# Supplementary material
Source: MDPI journal article supplement (https://www.mdpi.com/2227-9717/9/3/425)
Supplement: s1 [file s1]

## Article

# Using Peptidomics and Machine Learning to Assess Effects of Drying Processes on the Peptide Profile within a Functional Ingredient

Sweeny Chauhan, Sean O'Callaghan, Audrey Wall \*, Tomasz Pawlak, Ben Doyle, Alessandro Adelfio, Sanja Trajkovic, Mark Gaffney and Nora Khaldi

Nuritas Ltd., Joshua Dawson House, Dawson St, D02 RY95 Dublin , Ireland.; chauhan.sweeny@nuritas.com (S.C.); info@nuritas.com (S.O.); pawlak.tomasz@nuritas.com (T.P.); doyle.ben@nuritas.com (B.D.); adelfio.alessandro@nuritas.com (A.A.); trajkovic.sanja@nuritas.com (S.T.); gaffney.mark@nuritas.com (M.G.); n.khaldi@Nuritas.com (N.K.)

\* Correspondence: wall.audrey@nuritas.com; Tel.: +353-1-430-1290

**Table S1.** List of unique peptides and their physicochemical characteristics, identified in Freeze-dried samples.

| prools_id     | Charge | Length | % Hydrophobicity |
|---------------|--------|--------|------------------|
| prl_SENOGUNYJ | −0.24  | 10     | 40.00            |
| prl_LOWASYLYF | −2.6   | 17     | 17.65            |
| prl_NYDUKIWEG | 0.76   | 8      | 50.00            |
| prl_ZONIGYNUS | −0.24  | 9      | 33.33            |
| prl_BOWAWOPEH | −1.26  | 14     | 42.86            |
| prl_WELUBEBEZ | −0.27  | 13     | 38.46            |
| prl_FATUVEDIV | 1.8    | 18     | 38.89            |
| prl_TEPADOWET | −4.23  | 30     | 26.67            |
| prl_PIGAGUBAZ | −1.24  | 7      | 42.86            |
| prl_GYNOFEJAT | −1.04  | 12     | 25.00            |
| prl_SOWUGALOV | −1.24  | 7      | 42.86            |
| prl_HOPUNUPEK | 0.76   | 13     | 38.46            |
| prl_DYFEGOGYP | −2.45  | 13     | 46.15            |
| prl_NUFYNAZOK | −3.23  | 25     | 24.00            |
| prl_ZOZALUGYM | −1.24  | 18     | 55.56            |
| prl_VAVYWYDIL | −1.11  | 14     | 28.57            |
| prl_BIKUVEBIM | −0.54  | 8      | 25.00            |
| prl_TANOMYDYZ | −0.15  | 8      | 37.50            |
| prl_JUPIFOZYG | 0.75   | 15     | 33.33            |
| prl_NYWYBEVAP | −1.23  | 11     | 36.36            |
| prl_HOJYGADAS | −3.03  | 14     | 50.00            |
| prl_TAMAPADIB | 0.5    | 9      | 55.56            |
| prl_WUVIBOZAT | 1.76   | 15     | 33.33            |
| prl_FOWEVIKYG | 0.76   | 9      | 22.22            |
| prl_BIGILIHEN | −0.24  | 17     | 23.53            |
| prl_MEKYLEPEN | −3.11  | 14     | 42.86            |
| prl_MAGYBUPYH | 0.73   | 9      | 55.56            |
| prl_SOLETYTAG | −2.24  | 9      | 33.33            |
| prl_TUWESOFUF | −1.26  | 22     | 59.09            |
| prl_MUBYDOKAF | 0.8    | 7      | 71.43            |
| prl_PYBASYBOG | −0.15  | 9      | 44.44            |
| prl_PYPUKOVIN | 2.79   | 11     | 27.27            |

---

|               |       |    |       |
|---------------|-------|----|-------|
| prl_FUFUZUKYS | 0.79  | 7  | 42.86 |
| prl_TOLYSONEH | −0.15 | 18 | 50.00 |
| prl_VEKUHYJAV | 0.76  | 8  | 62.50 |
| prl_DIPAPEFYN | −1.24 | 11 | 27.27 |
| prl_BOHUPEZAM | −0.26 | 11 | 27.27 |
| prl_PIGOTOHIF | −1.15 | 9  | 55.56 |
| prl_GYWIFYKUG | −0.15 | 18 | 27.78 |
| prl_DOTOZOMUS | −2.24 | 19 | 36.84 |
| prl_SUHEPEFUF | −0.24 | 10 | 60.00 |
| prl_GIFEHONYL | −0.24 | 20 | 30.00 |
| prl_TOJEGEGUP | −0.24 | 9  | 77.78 |
| prl_PISAWENID | −1.15 | 19 | 15.79 |
| prl_WOFYZENEZ | 0.8   | 9  | 88.89 |
| prl_ZESIHIWOS | −1.24 | 9  | 55.56 |
| prl_LONOLAJYG | −0.15 | 12 | 50.00 |
| prl_DEPABEDOH | 0.76  | 9  | 44.44 |
| prl_BOGYNEHUL | −1.26 | 7  | 71.43 |
| prl_ZUHIFENUP | −2.17 | 25 | 40.00 |
| prl_NYFAWIBOT | −1.24 | 8  | 37.50 |
| prl_BUBIDATOJ | −2.15 | 16 | 12.50 |
| prl_ZETIFIKYS | −0.24 | 14 | 42.86 |
| prl_VAFEDUHYM | −1.26 | 18 | 27.78 |
| prl_FITEGASUL | −3.14 | 10 | 40.00 |
| prl_VELIWIVUV | −2.17 | 8  | 37.50 |
| prl_PYBISUHUM | −2.15 | 10 | 50.00 |
| prl_TYSIVYFIT | 0.05  | 7  | 14.29 |
| prl_BYBIFUSAZ | 0.76  | 18 | 27.78 |
| prl_SOPOVYLOH | −2.44 | 15 | 20.00 |
| prl_FYNYBIHUN | 0.8   | 9  | 33.33 |
| prl_MIGIHYSAM | −0.15 | 7  | 57.14 |
| prl_VYSOBYFUN | 1.05  | 10 | 40.00 |
| prl_VANAJYVIK | −0.24 | 11 | 81.82 |
| prl_LODUSUWUJ | −1.16 | 10 | 40.00 |
| prl_MYKYTAWAP | 1.76  | 21 | 47.62 |
| prl_ZUDYDEWAF | −0.21 | 7  | 14.29 |
| prl_NUPOJEGID | −1.24 | 9  | 44.44 |
| prl_MAVOTAHUM | −1.2  | 8  | 50.00 |
| prl_LEPIFAPUM | −0.54 | 14 | 50.00 |
| prl_WEKEZAVAZ | −0.24 | 9  | 55.56 |
| prl_BUMEHOVIN | 0.46  | 14 | 42.86 |
| prl_MASOMEKEJ | 0.73  | 7  | 57.14 |
| prl_FEFEHEGUB | −2.6  | 21 | 14.29 |
| prl_LINAVADUS | −0.2  | 15 | 46.67 |
| prl_TOWIKYZIF | −1.24 | 8  | 50.00 |
| prl_JINEZIZYH | −1.26 | 16 | 68.75 |
| prl_TAPOPOFYP | −0.24 | 7  | 57.14 |
| prl_SIMAZEGIT | −2.15 | 17 | 52.94 |
| prl_LYJYLUWIV | −1.54 | 7  | 57.14 |
| prl_BIZILATIN | −1.24 | 8  | 25.00 |
| prl_HUBYVOKAP | 0.76  | 7  | 57.14 |
| prl_GUGANINUZ | −1.23 | 8  | 37.50 |

---

---

|                |       |    |       |
|----------------|-------|----|-------|
| prl_DIJEZOSOP  | 0.73  | 20 | 50.00 |
| prl_SESINAJIM  | -2.14 | 17 | 52.94 |
| prl_VEGUPOTED  | -0.2  | 8  | 50.00 |
| prl_BIWEPIKOS  | -0.15 | 11 | 63.64 |
| prl_TIHEMIPUH  | -0.54 | 13 | 53.85 |
| prl_JUPUPIMOW  | -1.51 | 9  | 22.22 |
| prl_BYVUJOGEF  | 0.76  | 7  | 42.86 |
| prl_TIVALYFED  | -0.15 | 11 | 36.36 |
| prl_GAMELEZEH  | 0.5   | 11 | 54.55 |
| prl_HOSYMUBEW  | -0.24 | 10 | 20.00 |
| prl_ZEGELOTIB  | -0.12 | 7  | 57.14 |
| prl_VUWAPASAZ  | -1.24 | 10 | 50.00 |
| prl_HOPEKONAF  | -2.24 | 13 | 30.77 |
| prl_LEDIFUHOJ  | 0.85  | 12 | 25.00 |
| prl_TEVANAGAM  | -0.15 | 11 | 45.45 |
| prl_TUJANEKIF  | -2.24 | 15 | 20.00 |
| prl_SOHUWUJYW  | 0.76  | 10 | 80.00 |
| prl_PILISOBAG  | -1.6  | 12 | 16.67 |
| prl_NIKYSUGOT  | 0.4   | 9  | 55.56 |
| prl_WUTAMEBEN  | -0.2  | 11 | 63.64 |
| prl_VAZEUVUFOS | -3.22 | 13 | 30.77 |
| prl_JIDIKADUP  | -0.54 | 11 | 9.09  |
| prl_ZEMUKYHUM  | -1.24 | 10 | 10.00 |
| prl_SUWEJEPOF  | -0.27 | 10 | 20.00 |
| prl_WILYLASIT  | 0.8   | 7  | 42.86 |
| prl_WONOLAWOJ  | -0.54 | 8  | 37.50 |
| prl_LETIWYKUP  | -0.54 | 12 | 50.00 |
| prl_JEPUHEWUH  | -2.18 | 15 | 60.00 |
| prl_HUZYZUJEK  | -3.15 | 8  | 12.50 |
| prl_SIWATEZEM  | -0.24 | 10 | 30.00 |
| prl_WATAGINOL  | -0.15 | 13 | 38.46 |
| prl_SAJUWODOJ  | 0.76  | 12 | 33.33 |
| prl_JOSOMYJAV  | 0.73  | 10 | 60.00 |
| prl_GYGUWALUW  | 0.85  | 18 | 27.78 |
| prl_HIZEPYTUS  | -1.15 | 18 | 33.33 |
| prl_HIMYFAFIM  | 1.76  | 14 | 21.43 |
| prl_TUWINAVYS  | -2.15 | 10 | 50.00 |
| prl_MYDEPUNAP  | 0.79  | 8  | 37.50 |
| prl_TOZEHOWOF  | -0.15 | 9  | 44.44 |
| prl_MOLYWAWYT  | -0.26 | 12 | 58.33 |
| prl_ZYPYTEKEK  | 0.76  | 12 | 50.00 |
| prl_VAGAWOTIH  | -0.24 | 18 | 22.22 |
| prl_JATUKUBEF  | -0.24 | 7  | 57.14 |
| prl_TOVONIMAK  | 0.76  | 17 | 23.53 |
| prl_GAMIKAWEH  | -2.44 | 12 | 58.33 |
| prl_MIFOHEKUM  | -1.23 | 11 | 9.09  |
| prl_DULEGODEL  | 1.76  | 14 | 57.14 |
| prl_DUMIWAPAF  | -0.15 | 9  | 44.44 |
| prl_DEZUSYFID  | -0.15 | 8  | 50.00 |
| prl_MOWUDUFYV  | -3.51 | 12 | 33.33 |
| prl_JEVODYKUG  | -1.08 | 11 | 45.45 |

---

---

|               |       |    |       |
|---------------|-------|----|-------|
| prl_PIKOFISES | −0.24 | 10 | 30.00 |
| prl_ZIGUWOSEV | −0.24 | 10 | 60.00 |
| prl_HYGYVATUW | −0.6  | 9  | 44.44 |
| prl_SADEWUVOW | −0.15 | 11 | 45.45 |
| prl_DIKAZUHYK | −0.15 | 16 | 62.50 |
| prl_NUVOBYDUH | −3.23 | 11 | 18.18 |
| prl_SAJIGADEG | −0.18 | 10 | 80.00 |
| prl_NABIFAKIZ | −0.26 | 11 | 54.55 |
| prl_KAKUPOGAD | −1.18 | 13 | 23.08 |
| prl_WUKUGITOT | −1.24 | 12 | 33.33 |
| prl_ZEGEBYHYT | 0.76  | 10 | 50.00 |
| prl_LIKIJUWOW | −2.16 | 7  | 57.14 |
| prl_NYWAGAHEW | −0.15 | 21 | 33.33 |
| prl_TENYMOKEV | −0.24 | 10 | 10.00 |
| prl_DYPEJUZOP | −0.54 | 14 | 57.14 |
| prl_MESOLODIZ | −1.24 | 7  | 71.43 |
| prl_WEZUHAVOW | −0.27 | 9  | 55.56 |
| prl_LOZOHAVUL | 0.76  | 11 | 36.36 |
| prl_NAGYTOGOT | −0.24 | 13 | 23.08 |
| prl_WYLYFUGYP | 0.73  | 10 | 30.00 |
| prl_MOFIKYLUL | −1.11 | 8  | 50.00 |
| prl_MYPYLITAZ | −1.24 | 7  | 71.43 |
| prl_NILANEKAL | −1.15 | 10 | 40.00 |
| prl_BEJINYPIG | −2.16 | 11 | 18.18 |
| prl_NIJUMAWIH | −1.26 | 11 | 45.45 |
| prl_ZYSIDYZUT | 1.79  | 13 | 23.08 |
| prl_MYJOKYPOT | 0.85  | 8  | 50.00 |
| prl_GALAWIWIH | −2.24 | 9  | 55.56 |
| prl_SITAFUMES | −1.24 | 12 | 50.00 |
| prl_BIGUKAKEW | −1.23 | 13 | 15.38 |
| prl_NAFEGEPAD | −0.25 | 16 | 43.75 |
| prl_KESIHETYZ | −2.24 | 9  | 55.56 |
| prl_SOSOSIZEK | −3.07 | 13 | 46.15 |
| prl_VOVEKOBYG | −1.26 | 9  | 44.44 |
| prl_JYWYKABET | −0.16 | 10 | 20.00 |
| prl_LEHEFOPUS | 0.76  | 10 | 60.00 |
| prl_BYPOFOVOK | −0.26 | 10 | 60.00 |
| prl_FETABINUL | −1.18 | 12 | 33.33 |
| prl_SOGABIGYH | 0.46  | 7  | 42.86 |
| prl_FAHOFYTYV | 1.76  | 15 | 60.00 |
| prl_WOHOLUVIM | −0.24 | 15 | 80.00 |
| prl_LOGEVEJID | −0.17 | 7  | 28.57 |
| prl_SIVOSOWUF | −1.24 | 12 | 33.33 |
| prl_TUGEBIKOZ | −2.23 | 15 | 53.33 |
| prl_SALOVYBYJ | 0.76  | 7  | 85.71 |
| prl_GUHITAVAF | −0.04 | 8  | 50.00 |
| prl_NIKAFOGYS | −1.45 | 14 | 21.43 |
| prl_NANOTEMUW | 0.76  | 11 | 18.18 |
| prl_DEDYGUKOL | −0.24 | 7  | 14.29 |
| prl_JOKOTOSYF | 0.76  | 8  | 62.50 |
| prl_JUNAWEKUD | −1.16 | 17 | 23.53 |

---

---

|               |       |    |       |
|---------------|-------|----|-------|
| prl_NYMYWADUS | −2.53 | 17 | 41.18 |
| prl_FAKULEMYZ | −1.16 | 13 | 30.77 |
| prl_KYDOHYSIH | −0.24 | 8  | 62.50 |
| prl_VAJAVIZUD | −2.06 | 9  | 22.22 |
| prl_PUGAWIDID | −1.6  | 15 | 73.33 |
| prl_ZESEGYDOP | −0.24 | 11 | 45.45 |
| prl_NASUFOTOT | −3.14 | 23 | 17.39 |
| prl_LUFALOMOT | −0.2  | 9  | 55.56 |
| prl_NESUNYDYW | −0.27 | 7  | 57.14 |
| prl_WYGIWISOD | 0.85  | 14 | 35.71 |
| prl_LINETUWOT | −0.27 | 8  | 62.50 |
| prl_VUJYDEVYP | −0.24 | 7  | 0.00  |
| prl_WOKIVESED | −0.12 | 7  | 71.43 |
| prl_VEMIJOGET | −0.24 | 7  | 57.14 |
| prl_FIDOZIJAF | 0.76  | 16 | 25.00 |
| prl_FYBUZIWOJ | −1.2  | 9  | 66.67 |
| prl_DOFYFUVIF | −0.15 | 15 | 46.67 |
| prl_PIMASOFON | −2.08 | 13 | 15.38 |
| prl_BIDADAWEN | 0.74  | 15 | 46.67 |
| prl_WAJYVEGAT | 1.76  | 19 | 42.11 |
| prl_VIWIBEGOZ | −0.24 | 14 | 28.57 |
| prl_VYGILUPYG | −0.15 | 21 | 23.81 |
| prl_FYFOZIDAJ | −0.25 | 14 | 35.71 |
| prl_BYBIGAVYF | −0.15 | 15 | 53.33 |
| prl_VEDAZAVIM | −1.26 | 10 | 40.00 |
| prl_HITUBIKYT | −0.24 | 9  | 22.22 |
| prl_WILABAWEH | −1.21 | 10 | 20.00 |
| prl_LAJATYJAN | −0.06 | 11 | 27.27 |
| prl_MEWULOFYP | −1.26 | 15 | 33.33 |
| prl_MAVEGYKYZ | 1.73  | 20 | 60.00 |
| prl_NONUMAWEV | −2.26 | 12 | 41.67 |
| prl_PADOBABAW | −1.24 | 11 | 27.27 |
| prl_LIVYTYLOL | −3.15 | 13 | 53.85 |
| prl_FIZASUVEH | −0.6  | 7  | 42.86 |
| prl_VUTEMYHUG | 0.82  | 11 | 36.36 |
| prl_MYZAJEKIS | −0.5  | 9  | 55.56 |
| prl_PUBUPYWOH | −0.16 | 7  | 14.29 |
| prl_LUMINEPUD | −0.07 | 8  | 50.00 |
| prl_GYBIKUJYW | −2.23 | 7  | 42.86 |
| prl_FONAFYMIF | −0.24 | 11 | 36.36 |
| prl_POFYHOSUZ | −2.26 | 14 | 35.71 |
| prl_MUZOHAHEF | −3.53 | 14 | 35.71 |
| prl_MYVIHUIH  | −0.24 | 8  | 37.50 |
| prl_FOVIVYLYB | −0.27 | 10 | 70.00 |
| prl_GEBYFIKIJ | 0.76  | 8  | 50.00 |
| prl_DEFIWAKAH | −0.24 | 13 | 46.15 |
| prl_FYJEGYHOL | −1.24 | 16 | 31.25 |
| prl_SIHYMIGIJ | −0.24 | 9  | 33.33 |
| prl_NOTENAHUF | −1.03 | 18 | 22.22 |
| prl_NUJUSIPUS | −1.2  | 7  | 57.14 |
| prl_MEPIVIJUV | 0.76  | 8  | 50.00 |

---

---

|               |       |    |       |
|---------------|-------|----|-------|
| prl_JOMYJATYD | −0.24 | 10 | 60.00 |
| prl_WOMUTEKOG | 0.46  | 12 | 41.67 |
| prl_PABYJOKEZ | −1.24 | 7  | 28.57 |
| prl_JOSYHIDYK | −0.45 | 13 | 46.15 |
| prl_GETISYNAB | 0.8   | 15 | 53.33 |
| prl_DIWEZAJAK | −0.24 | 7  | 42.86 |
| prl_BYSYGUBOM | −0.24 | 7  | 14.29 |
| prl_JUTUJYPUS | 0.76  | 8  | 50.00 |
| prl_TOPAZYGIK | −1.26 | 16 | 62.50 |
| prl_BOJIDUHAL | 0.76  | 9  | 22.22 |
| prl_PEFIBAHUN | −3.23 | 13 | 15.38 |
| prl_VEHUZIJOK | −1.24 | 13 | 53.85 |
| prl_VAPYLOTAN | −1.06 | 14 | 64.29 |
| prl_BYTYBADED | −3.14 | 21 | 14.29 |
| prl_DEFOGOBEG | −2.17 | 10 | 40.00 |
| prl_GYBEBUHET | 0.76  | 9  | 44.44 |
| prl_PAFEKADED | 0.76  | 11 | 63.64 |
| prl_LIDAFONUB | 1.76  | 12 | 25.00 |
| prl_VEDOJYDYN | −0.24 | 11 | 45.45 |
| prl_MEMOFEMEG | 0.46  | 12 | 41.67 |
| prl_HILIDUPUD | −1.24 | 8  | 75.00 |
| prl_ZYDUJULIF | −1.24 | 8  | 37.50 |
| prl_ZONATEDAP | −1.24 | 10 | 40.00 |
| prl_VUJIZEGUH | −2.15 | 24 | 33.33 |
| prl_TANEVIGYK | 0.76  | 8  | 50.00 |
| prl_BONIGOVAS | −2.6  | 7  | 28.57 |
| prl_ZUJOKYLYD | 0.76  | 7  | 42.86 |
| prl_ZEJUKIFIZ | −0.24 | 10 | 50.00 |
| prl_JITUWEBEK | −0.54 | 8  | 50.00 |
| prl_NOPEBYDUS | −0.24 | 25 | 64.00 |
| prl_NYHIJUVIJ | −1.26 | 15 | 26.67 |
| prl_FEWUDYZOG | −2.15 | 14 | 28.57 |
| prl_ZIWOJUTOH | −0.24 | 16 | 37.50 |
| prl_ZOBEHIKUL | −1.24 | 7  | 28.57 |
| prl_ZEWOJUZOM | 0.76  | 8  | 25.00 |
| prl_BEFIBEFEH | −1.15 | 7  | 57.14 |
| prl_WENALYKAB | 0.76  | 14 | 42.86 |
| prl_DOVOZYTUB | 0.8   | 19 | 63.16 |
| prl_TEFEKITAL | −1.15 | 9  | 55.56 |
| prl_MALEPIDEL | 0.76  | 12 | 41.67 |
| prl_WUDUTYFAD | −1.5  | 7  | 42.86 |
| prl_LUJAHAFUP | −0.21 | 7  | 28.57 |
| prl_FAPEGUDOJ | −3.04 | 11 | 63.64 |
| prl_PANULUFIT | −1.18 | 7  | 42.86 |
| prl_NYBYGAVYF | −2.14 | 8  | 50.00 |
| prl_NYGUFANOZ | −0.24 | 13 | 38.46 |
| prl_NYJILEWUV | −6.53 | 39 | 25.64 |
| prl_BEWODODET | 0.76  | 12 | 83.33 |
| prl_SATUDAMET | −0.24 | 10 | 60.00 |
| prl_PAGILIWYL | −0.15 | 11 | 27.27 |
| prl_WAJIJUWYZ | −0.15 | 16 | 62.50 |

---

---

|               |       |    |       |
|---------------|-------|----|-------|
| prl_LULIMYBIF | −1.15 | 8  | 62.50 |
| prl_BALOVUHYT | 1.76  | 14 | 57.14 |
| prl_TOFYWAZYB | −1.26 | 11 | 45.45 |
| prl_GAJAMILEV | −0.24 | 12 | 33.33 |
| prl_ZOSAVOHUD | −0.24 | 10 | 40.00 |
| prl_HAGYFYBAM | −1.15 | 13 | 69.23 |
| prl_VIMEPUBON | −2.11 | 10 | 50.00 |
| prl_NODYPYGOW | −2.14 | 17 | 47.06 |
| prl_SAMYNKYV  | 0.79  | 16 | 25.00 |
| prl_PAGUSOBAM | −2.23 | 12 | 33.33 |
| prl_FEZEGAMOM | 0.79  | 7  | 28.57 |
| prl_DEZYIJAF  | 0.76  | 12 | 50.00 |
| prl_BASEWYLYG | 0.76  | 11 | 27.27 |
| prl_FOSIVEHEZ | −0.27 | 12 | 41.67 |
| prl_WYBITIDIZ | 0.76  | 13 | 46.15 |
| prl_BILEWAFEM | 1.04  | 15 | 46.67 |
| prl_LUGYWUDOD | −0.24 | 11 | 54.55 |
| prl_MIHUVEBAP | 0.76  | 11 | 63.64 |
| prl_MAMILOGUN | 0.76  | 8  | 50.00 |
| prl_LIHUGIBED | −0.24 | 7  | 14.29 |
| prl_SYDATELEF | −1.18 | 16 | 25.00 |
| prl_SUTEPEKIH | −3.53 | 16 | 31.25 |
| prl_WEWAMYSES | −1.2  | 15 | 20.00 |
| prl_FEKASOTOH | −0.15 | 12 | 50.00 |
| prl_TUNIHIZOB | −1.16 | 9  | 44.44 |
| prl_BUJITEZUZ | −0.24 | 11 | 54.55 |
| prl_DYLOKISUT | −1.15 | 9  | 55.56 |
| prl_GAKOKINUT | −1.24 | 14 | 35.71 |
| prl_ZUKIFOWOG | −0.15 | 12 | 33.33 |
| prl_LATASYFIT | −1.25 | 12 | 41.67 |
| prl_TANASIHIV | −0.26 | 13 | 46.15 |
| prl_FOBONIMAP | −0.24 | 7  | 42.86 |
| prl_VYTULAJIN | −2.24 | 17 | 35.29 |
| prl_NEMAFYWIM | −1.14 | 21 | 19.05 |
| prl_WANOBIBIH | 0.76  | 19 | 42.11 |
| prl_KELODAVAJ | 0.73  | 10 | 60.00 |
| prl_ZYLEPYPUB | −1.23 | 23 | 30.43 |
| prl_DUPUWUHUV | −0.24 | 16 | 43.75 |
| prl_HASYZENOH | −1.15 | 14 | 35.71 |
| prl_HENATIZEH | −1.24 | 13 | 30.77 |
| prl_WAVUJYDYZ | −1.16 | 13 | 23.08 |
| prl_SUJAZOZEB | −1.04 | 7  | 57.14 |
| prl_NODUPANIJ | −0.24 | 9  | 55.56 |
| prl_TAGYPEZIJ | −1.07 | 16 | 31.25 |
| prl_JODOTEBYG | 0.4   | 11 | 45.45 |
| prl_BUVOBYLUF | −1.24 | 7  | 85.71 |
| prl_WUFASYVED | −2.54 | 8  | 37.50 |
| prl_JIHEFABYD | −2.15 | 13 | 61.54 |
| prl_DUMOJADAP | 0.05  | 12 | 58.33 |
| prl_BUKYGOVIW | −3.23 | 13 | 46.15 |
| prl_NIBALIDIP | −1.15 | 11 | 72.73 |

---

---

|               |       |    |       |
|---------------|-------|----|-------|
| prl_BAWITYSIP | −2.23 | 13 | 46.15 |
| prl_LUDYJAVAS | 0.76  | 10 | 50.00 |
| prl_NAMUFIMIL | −0.15 | 13 | 23.08 |
| prl_PAHAMODOZ | 0.4   | 7  | 14.29 |
| prl_PUHILYDUB | 0.5   | 8  | 62.50 |
| prl_BOZEHAVOJ | −0.54 | 14 | 50.00 |
| prl_ZOPIDONUF | 1.76  | 10 | 60.00 |
| prl_JILIVYJYW | −0.24 | 8  | 62.50 |
| prl_HEGYZOSUN | −0.24 | 15 | 46.67 |
| prl_PYKANUHUZ | 0.76  | 12 | 50.00 |
| prl_NEGUVEZON | −0.21 | 11 | 27.27 |
| prl_JYMYPENOV | −1.26 | 10 | 40.00 |
| prl_ZYVALUJYP | −0.04 | 13 | 69.23 |
| prl_MAZANUTAS | −0.24 | 17 | 17.65 |
| prl_NUDODYPOW | −1.15 | 12 | 75.00 |
| prl_FISISOSOS | −1.26 | 8  | 37.50 |
| prl_FOTUDODUH | −4.53 | 27 | 25.93 |
| prl_MENOKIZIF | −3.23 | 14 | 35.71 |
| prl_JAKEHADUN | −0.2  | 9  | 33.33 |
| prl_JUPITEKIS | −0.15 | 8  | 37.50 |
| prl_BYJYGEMIB | −2.14 | 16 | 18.75 |
| prl_NOGETEGUZ | −1.24 | 9  | 44.44 |
| prl_MYJAZISOZ | −0.54 | 8  | 37.50 |
| prl_WIDSELUV  | −2.26 | 8  | 37.50 |
| prl_KAZIJOSUW | −2.24 | 10 | 30.00 |
| prl_GUZYMIJOW | −2.24 | 22 | 45.45 |
| prl_TUBOWYJEF | −1.24 | 19 | 31.58 |
| prl_WYGIHOHOM | 1.74  | 19 | 47.37 |
| prl_KISUNABYV | 0.76  | 8  | 50.00 |
| prl_TESYVUKEK | 0.76  | 8  | 25.00 |
| prl_VOSASIFIL | 0.4   | 14 | 28.57 |
| prl_NYBUNIFUP | 1.76  | 8  | 37.50 |
| prl_BYDYGIHUL | −0.15 | 16 | 50.00 |
| prl_HUKODEDUV | −2.24 | 11 | 45.45 |
| prl_SEKOMYWEV | −1.23 | 24 | 33.33 |
| prl_MOFEJILIW | −0.24 | 14 | 21.43 |
| prl_KAFUZIDIL | −0.24 | 7  | 28.57 |
| prl_TOWOKULOZ | −0.03 | 12 | 50.00 |
| prl_SYVIJYDIL | 0.76  | 11 | 63.64 |
| prl_DAHAGAPYV | −0.16 | 7  | 28.57 |
| prl_JUGEJELAZ | 1.8   | 18 | 38.89 |
| prl_VYTYVUTYN | −2.14 | 8  | 37.50 |
| prl_GEFYTUKAZ | −1.15 | 14 | 21.43 |
| prl_TUNEKOVAV | −2.15 | 13 | 46.15 |
| prl_PUTATAHEM | −0.15 | 7  | 57.14 |
| prl_VOGYTAGUV | −2.24 | 14 | 35.71 |
| prl_TAWIZIMOH | −0.27 | 12 | 41.67 |
| prl_WIVOVEJOS | 0.96  | 13 | 38.46 |
| prl_NISEZOKYZ | −0.15 | 16 | 43.75 |
| prl_FUBOKOBEM | 0.55  | 10 | 20.00 |
| prl_FAMUNETET | −0.6  | 8  | 50.00 |

---



---

|               |       |    |       |
|---------------|-------|----|-------|
| prl_HYFOSUPAB | -2.26 | 8  | 25.00 |
| prl_NABIMOJOJ | -2.19 | 15 | 60.00 |
| prl_BYVUPOPUL | -2.04 | 21 | 19.05 |
| prl_GUBESYLIZ | -1.26 | 13 | 46.15 |
| prl_SEGUFEDYZ | -2.08 | 10 | 20.00 |
| prl_LAPUSIGAF | 0.46  | 10 | 40.00 |
| prl_VEFALONIF | -0.24 | 9  | 44.44 |
| prl_SOVYBILEM | -2.24 | 13 | 46.15 |
| prl_NONALIZAN | -0.24 | 8  | 50.00 |
| prl_VYVUTITOW | -0.24 | 14 | 57.14 |
| prl_FENAVESAL | -2.53 | 9  | 55.56 |
| prl_TYVOSANOL | -1.08 | 7  | 28.57 |
| prl_SASYBAVOM | -0.15 | 9  | 33.33 |
| prl_SOWYNAHIP | -1.44 | 19 | 21.05 |
| prl_FADAPIJAP | 0.73  | 7  | 28.57 |
| prl_TISULEJYN | -0.23 | 10 | 40.00 |
| prl_PYWOSYPAK | 0.73  | 8  | 62.50 |
| prl_WEVETOPAT | -3.53 | 11 | 27.27 |
| prl_JYPYKOSUD | 1.76  | 16 | 25.00 |
| prl_KATANUFUB | 0.76  | 15 | 40.00 |
| prl_HAWEKASAT | -0.24 | 7  | 71.43 |
| prl_ZIKIMUBEL | -3.25 | 19 | 57.89 |
| prl_TYDUWYSYD | -0.15 | 14 | 21.43 |
| prl_FAFOVEJYG | -0.24 | 11 | 36.36 |
| prl_TUPOKYWYW | -2.26 | 15 | 46.67 |
| prl_SEKEVASIF | -0.26 | 7  | 57.14 |
| prl_FUTODOBIS | -0.24 | 11 | 36.36 |
| prl_HEFETYVIV | 0.76  | 13 | 38.46 |
| prl_PUFYZYLAK | 1.4   | 10 | 30.00 |
| prl_WUNYFEKOV | 1.76  | 9  | 44.44 |
| prl_SEJIHOTOK | -2.23 | 9  | 22.22 |
| prl_JITUVOLEJ | -0.24 | 15 | 26.67 |
| prl_BEDAGYJYH | -1.18 | 7  | 57.14 |
| prl_KYZAMAFUW | 0.02  | 8  | 25.00 |
| prl_BOBEJUNYW | 0.4   | 12 | 58.33 |
| prl_DIMOLIDAJ | -0.27 | 7  | 71.43 |
| prl_ZISOJOMYN | -1.15 | 20 | 20.00 |
| prl_BILAZUPIB | 0.46  | 11 | 45.45 |
| prl_HIHUNITIT | -2.16 | 8  | 75.00 |
| prl_KUSOMYHEG | 0.76  | 9  | 44.44 |
| prl_TIPIGIKEJ | -1.24 | 12 | 50.00 |
| prl_NIPUJYJUL | -0.15 | 9  | 55.56 |
| prl_ZODUJIDEF | -0.24 | 11 | 36.36 |
| prl_JODUNOLOT | -0.15 | 14 | 50.00 |
| prl_TYZUMUWUB | -0.27 | 7  | 57.14 |
| prl_HAVULYZAW | -0.54 | 10 | 40.00 |
| prl_FAJUWEDAJ | 0.73  | 10 | 50.00 |
| prl_POLIJUPID | -1.23 | 11 | 27.27 |
| prl_WABUNAHAL | 1.76  | 11 | 45.45 |
| prl_PYJUPULEP | 0.8   | 21 | 61.90 |
| prl_LIPAPAFEB | 0.73  | 20 | 45.00 |

---

---

|               |       |    |       |
|---------------|-------|----|-------|
| prl_ZYSIVELOS | 0.76  | 9  | 55.56 |
| prl_VADABOKIP | 0.82  | 9  | 22.22 |
| prl_SOJOKIWEW | -1.24 | 15 | 26.67 |
| prl_FITAZYHOT | 1.76  | 11 | 63.64 |
| prl_LAFILUPEG | -1.14 | 11 | 18.18 |
| prl_ZANEHYWYD | -0.15 | 27 | 37.04 |
| prl_BILETUMUM | -0.24 | 8  | 37.50 |
| prl_LEPAKOMUD | -0.54 | 8  | 37.50 |
| prl_ZOHOJEBUZ | 0.76  | 15 | 33.33 |
| prl_KYGYMIVYB | 0.76  | 10 | 30.00 |
| prl_LYDIGUMUD | -2.24 | 8  | 37.50 |
| prl_SIBOSAKYN | 0.76  | 9  | 33.33 |
| prl_GEGUTYJUD | -0.23 | 12 | 25.00 |
| prl_JEJAVYBUZ | 2.76  | 13 | 53.85 |
| prl_DUPIGUGOF | -0.54 | 12 | 58.33 |
| prl_GIBINEGON | -1.24 | 10 | 10.00 |
| prl_NIWAVIDIZ | -0.24 | 13 | 61.54 |
| prl_WUWUDEVOD | -0.16 | 11 | 36.36 |
| prl_KENUBASOZ | -0.24 | 20 | 40.00 |
| prl_SYKUWULID | -0.21 | 7  | 57.14 |
| prl_FABAMIMYZ | -0.15 | 14 | 50.00 |
| prl_VATEWYHUW | -0.6  | 8  | 75.00 |
| prl_FEGIKIBAS | -0.24 | 13 | 30.77 |
| prl_LYVEDAJEK | 0.76  | 11 | 36.36 |
| prl_GEFIHAGYM | -2.14 | 7  | 28.57 |
| prl_HIDELYSUM | 0.76  | 15 | 33.33 |
| prl_LAHOGOZUM | -1.26 | 10 | 20.00 |
| prl_GYZOLUTEH | -1.23 | 8  | 75.00 |
| prl_NUGAPUSUJ | -0.24 | 13 | 61.54 |
| prl_MEBYGEMUZ | 1.73  | 10 | 50.00 |
| prl_WIKOHIZAZ | -0.15 | 7  | 14.29 |
| prl_KOFAGOMIK | -0.23 | 13 | 46.15 |
| prl_ZATOMAKEN | -1.24 | 10 | 50.00 |
| prl_ZEFYLEHAK | -0.54 | 8  | 37.50 |
| prl_DOKYHASYW | -0.26 | 11 | 54.55 |
| prl_TINUSEVEB | -4.23 | 18 | 11.11 |
| prl_LIKYBYVYF | 0.76  | 15 | 40.00 |
| prl_GONIVYLES | -0.04 | 10 | 50.00 |
| prl_JEWIVYNOK | -1.24 | 17 | 52.94 |
| prl_LUKYTYLUP | -2.23 | 12 | 50.00 |
| prl_VOBYTEMUW | 0.76  | 14 | 42.86 |
| prl_ZUTUFAVUD | -0.15 | 13 | 46.15 |
| prl_BILILOKYT | -1.16 | 9  | 44.44 |
| prl_PIGEBIHIB | -2.15 | 12 | 58.33 |
| prl_HEZIMULIH | -2.24 | 24 | 29.17 |
| prl_VONozILAK | 0.76  | 7  | 71.43 |
| prl_TEMUTIPIG | -2.24 | 9  | 55.56 |
| prl_POBAFIPAW | 0.76  | 17 | 17.65 |
| prl_VEDIDUBUF | -1.24 | 8  | 62.50 |
| prl_JAGIVIJES | -2.15 | 11 | 45.45 |
| prl_WASAWUSIF | -2.53 | 14 | 35.71 |

---

---

|               |       |    |       |
|---------------|-------|----|-------|
| prl_TOJEHAHUF | -1.15 | 11 | 63.64 |
| prl_ZYMYHYJUW | -1.14 | 15 | 20.00 |
| prl_ZUMAJUZIG | 0.76  | 12 | 50.00 |
| prl_KIHOJEJEH | 0.8   | 12 | 33.33 |
| prl_PILYMAZAG | 1.46  | 8  | 25.00 |
| prl_FIGENASIJ | -1.24 | 12 | 50.00 |
| prl_ZOKAMATOD | -1.15 | 9  | 55.56 |
| prl_SESIVULEZ | -1.24 | 10 | 50.00 |
| prl_DEGUKIDIN | -0.15 | 7  | 28.57 |
| prl_BEZIJASIN | -1.26 | 9  | 66.67 |
| prl_PULOHAVAB | -0.16 | 8  | 50.00 |
| prl_HYWEMYMIH | -1.08 | 7  | 42.86 |
| prl_MYFYSEFAL | -0.15 | 9  | 44.44 |
| prl_SUBOPUVYM | 0.73  | 8  | 62.50 |
| prl_WIDEJEMEP | -3.07 | 15 | 60.00 |
| prl_HIDULATOG | -0.24 | 9  | 22.22 |
| prl_JEFUMYHIN | 0.74  | 12 | 41.67 |
| prl_BUJUPYTIJ | -0.2  | 7  | 71.43 |
| prl_MAVYKUFAD | 0.76  | 9  | 44.44 |
| prl_ZEKUGYFIP | 0.76  | 10 | 20.00 |
| prl_LAMILYBAW | -0.15 | 16 | 50.00 |
| prl_LUZOBIBEJ | -2.26 | 11 | 63.64 |
| prl_HYTUMOFIK | 0.76  | 14 | 57.14 |
| prl_ZUVIKUNAP | 0.76  | 10 | 50.00 |
| prl_DUVIHITOJ | -0.04 | 7  | 28.57 |
| prl_MUVIKOSUD | 0.76  | 14 | 28.57 |
| prl_GEPIJATOF | -2.17 | 14 | 64.29 |
| prl_TOJIZYLET | 1.73  | 9  | 44.44 |
| prl_MYKUVYKUT | -1.24 | 10 | 60.00 |
| prl_NOMYFYPYF | -1.04 | 13 | 23.08 |
| prl_DUGEPIVAF | 0.73  | 11 | 54.55 |
| prl_FOKOJIHOJ | -0.24 | 10 | 50.00 |
| prl_BAZOPOMAN | -2.15 | 13 | 61.54 |
| prl_HYVETYHYV | -0.16 | 9  | 55.56 |
| prl_HYWALAPYP | 0.76  | 15 | 26.67 |
| prl_FALOFUMYB | -0.24 | 15 | 40.00 |
| prl_DAZUTEMAP | -2.23 | 10 | 40.00 |
| prl_WYMUGUTAS | -2.49 | 12 | 25.00 |
| prl_FOVADEZUH | 0.79  | 15 | 33.33 |
| prl_JEVIDEVYF | -2.07 | 11 | 54.55 |
| prl_TUDIPETAN | -1.15 | 15 | 26.67 |
| prl_VIBYLUHEN | 0.76  | 16 | 43.75 |
| prl_JUHYHOWIF | -0.24 | 7  | 28.57 |
| prl_ZULUVOTUS | -2.26 | 16 | 37.50 |
| prl_GOLESINEF | -0.15 | 15 | 66.67 |
| prl_DYFISEVAV | -1.24 | 10 | 60.00 |
| prl_FUFOZINOZ | 0.73  | 11 | 45.45 |
| prl_SUHOWELEB | -1.06 | 16 | 62.50 |
| prl_PAJYLEFIW | -1.16 | 8  | 50.00 |
| prl_SOHASUTEW | -1.03 | 11 | 45.45 |
| prl_FAVEBIPYB | -0.12 | 13 | 53.85 |

---

---

|               |       |    |       |
|---------------|-------|----|-------|
| prl_JEGUDEWAV | -0.15 | 11 | 9.09  |
| prl_LUHAFEWIZ | -1.12 | 14 | 28.57 |
| prl_DUZUSAGUV | -1.6  | 7  | 28.57 |
| prl_NOHYMYLYK | 0.76  | 14 | 42.86 |
| prl_DOLIGIZEM | -1.53 | 12 | 58.33 |
| prl_TEKIDUJEH | 0.76  | 12 | 58.33 |
| prl_GETANIJIK | -0.15 | 15 | 46.67 |
| prl_HEZYJOJOV | -2.16 | 10 | 20.00 |
| prl_BOBONAKEK | -2.24 | 8  | 62.50 |
| prl_POLAMIZEH | -0.15 | 12 | 58.33 |
| prl_FADYLOFUZ | -1.23 | 12 | 25.00 |
| prl_KYBAJEVIM | 0.76  | 12 | 50.00 |
| prl_LEHOHOSOV | -2.26 | 8  | 62.50 |
| prl_LETELEDIF | 0.05  | 7  | 71.43 |
| prl_BUBYFIMYF | -0.54 | 15 | 46.67 |
| prl_LEMOVIWUV | -1.16 | 9  | 55.56 |
| prl_FISIBEHIB | -0.26 | 13 | 61.54 |
| prl_LUFAFYLAJ | -1.23 | 13 | 30.77 |
| prl_MYDYWYSYS | -0.15 | 10 | 20.00 |
| prl_HYPOTIKEM | -1.15 | 12 | 75.00 |
| prl_BUNEVIZYJ | 0.96  | 14 | 35.71 |
| prl_KIDINIDUM | -1.6  | 14 | 71.43 |
| prl_VOSYSAJIB | -1.2  | 13 | 53.85 |
| prl_HOKULESUZ | 1.76  | 15 | 40.00 |
| prl_SYNANODAV | -1.15 | 11 | 18.18 |
| prl_VILUHEMAB | -0.24 | 7  | 28.57 |
| prl_SOLAGITEL | -0.5  | 15 | 53.33 |
| prl_JUWASADIP | -0.18 | 9  | 55.56 |
| prl_WITAJOZUT | -0.15 | 8  | 50.00 |
| prl_GULUBIDIF | -0.27 | 24 | 62.50 |
| prl_KAHIPYWYJ | -1.24 | 26 | 19.23 |
| prl_WIKYPAJOH | 0.76  | 13 | 38.46 |
| prl_VYBAZELAW | -0.15 | 8  | 50.00 |
| prl_LELOPAHIG | -0.24 | 8  | 50.00 |
| prl_NENYMYHAW | 0.74  | 10 | 20.00 |
| prl_FAWYDOFUM | -0.23 | 11 | 45.45 |
| prl_BAJYPULYG | 0.4   | 12 | 66.67 |
| prl_TIWEFOPIL | -2.04 | 24 | 16.67 |
| prl_LITUWASYD | -1.54 | 8  | 37.50 |
| prl_ZIHEWATIZ | 0.76  | 10 | 30.00 |
| prl_KOGEZUSUS | -1.15 | 12 | 58.33 |
| prl_VOGUKIHUK | -0.24 | 9  | 33.33 |
| prl_TOJAVOJYT | -2.15 | 10 | 50.00 |
| prl_TELOLUWOG | -3.16 | 14 | 35.71 |
| prl_LAGETOZOH | 1.04  | 8  | 37.50 |
| prl_LENELOMYH | -0.24 | 8  | 50.00 |
| prl_HYNOTOFIW | -0.15 | 9  | 44.44 |
| prl_HUNYPYPAL | 0.76  | 7  | 71.43 |
| prl_WAKITYPAJ | 0.76  | 11 | 36.36 |
| prl_GYPYWUBOM | -0.24 | 8  | 75.00 |
| prl_MYNAWYMAS | -2.24 | 11 | 45.45 |

---

|               |       |    |       |
|---------------|-------|----|-------|
| prl_ZOSYDOGIT | 0.76  | 8  | 37.50 |
| prl_BYGABOKED | -1.04 | 7  | 57.14 |
| prl_BIWAMAZYT | -0.24 | 14 | 78.57 |
| prl_FAPIJENYZ | -2.16 | 9  | 55.56 |
| prl_HELONUHEM | -0.24 | 8  | 50.00 |
| prl_WAMUGYLEV | -0.24 | 10 | 50.00 |
| prl_TAMIGYNYT | -3.07 | 15 | 53.33 |
| prl_MOPABAMAB | 0.76  | 12 | 58.33 |
| prl_TEMIKEKIN | -1.16 | 9  | 44.44 |
| prl_MIGUDUTEB | -0.27 | 18 | 27.78 |
| prl_GIMOPATUJ | -1.24 | 10 | 20.00 |
| prl_DOVULELIT | -2.24 | 11 | 45.45 |
| prl_SEJASUHEF | -0.15 | 15 | 66.67 |
| prl_MOTAFOMUJ | -0.24 | 11 | 36.36 |
| prl_MYJAHOFAH | -1.14 | 18 | 22.22 |
| prl_DEZEWANAG | 0.85  | 10 | 20.00 |
| prl_VUVOHUKUJ | 0.76  | 14 | 50.00 |
| prl_TAKYBINUS | -1.15 | 10 | 60.00 |
| prl_SONIHIHYK | -1.15 | 9  | 55.56 |
| prl_TUGALIDOL | 1.79  | 9  | 22.22 |
| prl_JUHASOGAF | -0.54 | 9  | 11.11 |
| prl_TOMISIPOT | 0.46  | 7  | 28.57 |
| prl_GAKAZATIL | -0.24 | 9  | 44.44 |
| prl_TYPYHOTYG | -0.2  | 7  | 57.14 |
| prl_MABYWUMAG | -2.45 | 22 | 27.27 |
| prl_GEGEBIVOW | -0.6  | 8  | 37.50 |
| prl_DEDUZAWIF | -1.16 | 9  | 44.44 |
| prl_GYKINAKIS | 0.76  | 11 | 45.45 |
| prl_TYTUTUSET | -1.12 | 8  | 62.50 |
| prl_DUWUTEFAW | -3.2  | 9  | 33.33 |
| prl_WAKUDOPUF | -2.11 | 16 | 25.00 |
| prl_PAHOSOBYD | -1.26 | 15 | 73.33 |
| prl_LYFIWEVYM | -1.24 | 9  | 88.89 |
| prl_BUHENOPOL | -1.54 | 8  | 50.00 |
| prl_BEPEJELON | -0.15 | 23 | 21.74 |
| prl_JOSEWIFOK | 0.85  | 16 | 31.25 |
| prl_WYJIMAMUB | 0.76  | 10 | 50.00 |
| prl_KYKOZUMIF | -0.27 | 8  | 62.50 |
| prl_PULYFITAF | 0.73  | 7  | 57.14 |
| prl_BYTYMEMUV | -0.24 | 10 | 60.00 |
| prl_VELOPEJEZ | -1.24 | 11 | 72.73 |
| prl_MIDAKEMIW | 0.46  | 16 | 37.50 |
| prl_GINYPETYL | 0.76  | 7  | 28.57 |
| prl_WEKYPEBUN | -0.24 | 12 | 25.00 |
| prl_HONUMUVYN | -1.24 | 9  | 66.67 |
| prl_KAFIWOZID | -1.24 | 11 | 45.45 |
| prl_BIHOSOSAJ | 0.76  | 16 | 31.25 |
| prl_KUHIVOVIG | -0.17 | 11 | 45.45 |
| prl_HEBYVUSIT | 0.76  | 13 | 23.08 |
| prl_KUWIMEHAW | -0.26 | 10 | 60.00 |
| prl_JIPYKAPAN | -2.17 | 8  | 37.50 |

---

|                 |       |    |       |
|-----------------|-------|----|-------|
| prl_GYJUKUTOV   | −0.2  | 8  | 25.00 |
| prl_KEHEZOZAT   | 0.46  | 8  | 37.50 |
| prl_NIHIKAVOT   | 0.76  | 14 | 50.00 |
| prl_JAFETYZYN   | −2.24 | 16 | 18.75 |
| prl_BOGUHEDAP   | −0.15 | 7  | 28.57 |
| prl_ZOWOPOKIS   | −0.54 | 13 | 46.15 |
| prl_BEKADUMUV   | −2.26 | 17 | 41.18 |
| prl_KYPULOKYP   | −1.24 | 10 | 70.00 |
| prl_NOZOBAPAF   | −0.24 | 11 | 45.45 |
| prl_FIZUZISAG   | −1.45 | 11 | 36.36 |
| prl_GYVAPIWYS   | −4.06 | 18 | 33.33 |
| prl_DUTOBIVOH   | 0.4   | 8  | 12.50 |
| prl_NYMUDOZOS   | −3.23 | 13 | 38.46 |
| prl_VUFYTEHUH   | −0.21 | 8  | 62.50 |
| prl_MUTOVOMEH   | −0.54 | 9  | 44.44 |
| prl_KINASEBIG   | 0.46  | 9  | 44.44 |
| prl_KAKABIWEH   | −1.24 | 12 | 25.00 |
| prl_SIJIPYMIS   | 0.76  | 14 | 42.86 |
| prl_FESUKULEW   | −1.26 | 8  | 62.50 |
| prl_JAVOPOFAS   | 0.79  | 13 | 30.77 |
| prl_TUTIZYHES   | 0.76  | 9  | 66.67 |
| prl_PIDAGODAW   | −1.15 | 8  | 50.00 |
| prl_GUNULIBES   | −0.12 | 10 | 50.00 |
| prl_NAMIWEJIM   | −1.24 | 14 | 28.57 |
| prl_SILAZEDIV   | −1.24 | 11 | 54.55 |
| prl_SUBOHOWIL   | 0.73  | 16 | 37.50 |
| prl_TABYVUBAF   | −1.24 | 9  | 55.56 |
| prl_DAZEHAHAKUL | −0.27 | 12 | 50.00 |
| prl_BUWEPODEG   | −1.95 | 20 | 10.00 |
| prl_VISUDYSYH   | 1.04  | 9  | 44.44 |
| prl_VODUSUFUB   | −0.26 | 13 | 46.15 |
| prl_SEZAGYFYJ   | 0.76  | 10 | 50.00 |
| prl_KEKIJUKYF   | −0.24 | 8  | 75.00 |
| prl_BAWEVYNAG   | −0.24 | 8  | 25.00 |
| prl_NIPYPEKIJ   | 0.85  | 13 | 38.46 |
| prl_PETYNINIL   | −1.24 | 13 | 30.77 |
| prl_VEWIDUBYD   | −0.2  | 8  | 25.00 |
| prl_VUGEZYJEG   | 0.79  | 10 | 30.00 |
| prl_POPOVYSUL   | −2.26 | 10 | 50.00 |
| prl_VUGYJIKOB   | −0.45 | 11 | 45.45 |
| prl_LYPAFAMYJ   | −2.08 | 12 | 16.67 |
| prl_DOTAGAJAV   | −1.04 | 7  | 42.86 |
| prl_SOMUFEBUS   | 0.76  | 9  | 11.11 |
| prl_VIVAVEPAP   | −0.15 | 12 | 50.00 |
| prl_HITABYJON   | −0.24 | 8  | 50.00 |
| prl_ZIHIDAVES   | −0.15 | 19 | 21.05 |
| prl_NIDAGOKUZ   | −4.53 | 15 | 33.33 |
| prl_JAFYSYKAT   | −0.12 | 14 | 57.14 |
| prl_BIZIHYZEZ   | 1.76  | 14 | 57.14 |
| prl_KAJELEWOF   | −0.26 | 8  | 62.50 |
| prl_WYDAVAWOB   | 1.76  | 14 | 21.43 |

---

---

|                |       |    |       |
|----------------|-------|----|-------|
| prl_KUHADABEV  | -1.24 | 14 | 57.14 |
| prl_MEVUPAWUM  | 1.76  | 7  | 42.86 |
| prl_FATASYLIH  | -1.26 | 8  | 25.00 |
| prl_JUSALUZYK  | 0.79  | 9  | 55.56 |
| prl_ZEDYMITEK  | -1.26 | 8  | 37.50 |
| prl_FUSEGILYK  | -1.24 | 14 | 28.57 |
| prl_GAFUBETEH  | 0.76  | 11 | 63.64 |
| prl_FUHNAMIT   | -0.24 | 7  | 14.29 |
| prl_GUNEKOSSEG | -2.24 | 13 | 23.08 |
| prl_DIDYDADEB  | -0.15 | 14 | 42.86 |
| prl_JINIBENUG  | -1.24 | 13 | 69.23 |
| prl_FULATOTOZ  | -0.24 | 12 | 33.33 |
| prl_NONEFIWYK  | -0.26 | 13 | 30.77 |
| prl_VUNAJIBIW  | -0.24 | 11 | 63.64 |
| prl_FUSOGEMES  | 0.85  | 10 | 50.00 |
| prl_HIGUKAPUP  | -3.23 | 21 | 57.14 |
| prl_LUPINALUT  | -0.12 | 10 | 70.00 |
| prl_BYDYLUZSUZ | -0.24 | 9  | 33.33 |
| prl_BUDOBELJEL | 0.76  | 10 | 50.00 |
| prl_KOJATUDOM  | -0.24 | 8  | 25.00 |
| prl_JYPIWODIP  | -1.24 | 7  | 42.86 |
| prl_FUZUZODAK  | -0.24 | 9  | 44.44 |
| prl_KOMUVEKUN  | 0.76  | 13 | 46.15 |
| prl_HYKYNUMEW  | 0.85  | 18 | 44.44 |
| prl_VUDEFELHEL | -1.12 | 7  | 42.86 |
| prl_WATUWOJEL  | -0.15 | 12 | 33.33 |
| prl_BUKIJUMUD  | -0.24 | 10 | 60.00 |
| prl_DIDODAHYN  | -3.15 | 16 | 31.25 |
| prl_VADELYSYF  | -0.06 | 9  | 22.22 |
| prl_DELYHEHUF  | 0.76  | 13 | 53.85 |
| prl_DOKEBUHEZ  | -0.15 | 8  | 12.50 |
| prl_TEZEWYVIP  | 0.76  | 11 | 36.36 |
| prl_MAVOLIPOT  | -1.14 | 9  | 22.22 |
| prl_TOLOZYPOV  | -0.27 | 13 | 53.85 |
| prl_LEMYZYTIN  | -0.15 | 14 | 50.00 |
| prl_ZEFUNIWYM  | -1.23 | 8  | 25.00 |
| prl_NAVASUWYH  | -1.15 | 8  | 37.50 |
| prl_WELADYGAG  | -1.26 | 8  | 75.00 |
| prl_BOGIFOMYT  | 0.76  | 8  | 50.00 |
| prl_NUTIJOLAB  | -1.18 | 13 | 30.77 |
| prl_PUKEMUHYS  | -0.15 | 12 | 50.00 |
| prl_PEDAZYSYF  | 0.73  | 15 | 60.00 |
| prl_DIMITYLAG  | -2.17 | 16 | 43.75 |
| prl_WEHYNAPOV  | -0.24 | 10 | 50.00 |
| prl_KAHOLEHIS  | -0.15 | 18 | 38.89 |
| prl_HUBAPIFUM  | 0.76  | 17 | 35.29 |
| prl_LUSIKIZEN  | 0.8   | 10 | 30.00 |
| prl_KAHOGEHIV  | -1.23 | 12 | 50.00 |
| prl_DODEBIPUM  | -1.15 | 10 | 40.00 |
| prl_BUGYDOMOJ  | -0.51 | 23 | 69.57 |
| prl_JIGEDOPED  | -1.15 | 8  | 62.50 |

---

---

|               |       |    |       |
|---------------|-------|----|-------|
| prl_TYHALESIN | -4.52 | 14 | 28.57 |
| prl_LOSUDYBIK | -1.24 | 10 | 50.00 |
| prl_HUKOVUSIH | -0.95 | 21 | 9.52  |
| prl_VAHEVOTEV | -0.15 | 18 | 22.22 |
| prl_MEGEPILEG | -0.23 | 12 | 41.67 |
| prl_KYWOWUDAT | -2.15 | 11 | 54.55 |
| prl_TAKUNODOF | 0.76  | 9  | 66.67 |
| prl_JAFOBITAT | -1.18 | 12 | 66.67 |
| prl_TOFOKINIL | -2.45 | 18 | 38.89 |
| prl_VANULOGUB | 0.8   | 12 | 41.67 |
| prl_MUBOWAVEZ | 0.76  | 11 | 54.55 |
| prl_LOFEVAPYW | -4.07 | 14 | 42.86 |
| prl_PYFYFYPAV | -0.15 | 7  | 42.86 |
| prl_KIHEMEJAL | -3.45 | 14 | 14.29 |
| prl_PYFANOTYS | 0.73  | 18 | 55.56 |
| prl_FAVOHIDUP | -0.04 | 8  | 50.00 |
| prl_SAZEZAZYG | -1.14 | 26 | 19.23 |
| prl_PYKAVYMY  | 0.73  | 8  | 50.00 |
| prl_SANADEBIB | 0.84  | 16 | 37.50 |
| prl_FADAVEPIH | -1.24 | 10 | 50.00 |
| prl_GALUGUKUS | 0.76  | 9  | 22.22 |
| prl_VASOMAVYT | -0.54 | 12 | 58.33 |
| prl_VUWYDODIG | -0.15 | 7  | 42.86 |
| prl_MEVYDOFAM | -0.24 | 7  | 85.71 |
| prl_BAPEPUFID | -0.07 | 9  | 55.56 |
| prl_KELUDUZEW | -0.24 | 10 | 20.00 |
| prl_MAGIVOJOH | 1.76  | 17 | 35.29 |
| prl_HYWYLUWAH | -2.26 | 11 | 45.45 |
| prl_HIMOKEKEB | -1.16 | 14 | 50.00 |
| prl_JASOBADEB | -2.23 | 12 | 8.33  |
| prl_NOJUHULUG | 1.75  | 20 | 55.00 |
| prl_SEJOBVUT  | -1.6  | 7  | 57.14 |
| prl_PEDUSUMEB | -0.26 | 12 | 33.33 |
| prl_MOGUGIGEL | -0.15 | 14 | 50.00 |
| prl_DETUSILYP | -1.24 | 7  | 42.86 |
| prl_LAZOVEPYT | 1.76  | 12 | 50.00 |
| prl_JABYLEDEB | 0.76  | 10 | 60.00 |
| prl_ZODOZADAS | 0.76  | 12 | 50.00 |
| prl_LEJEDOWAH | -1.24 | 13 | 46.15 |
| prl_ZENOSUJAH | 0.79  | 20 | 20.00 |
| prl_ZASEMAMYK | -1.45 | 14 | 42.86 |
| prl_KESEDOZEL | -1.24 | 9  | 77.78 |
| prl_TYBUVYSYV | -0.24 | 10 | 40.00 |
| prl_KUFYGIMEN | -3.26 | 13 | 38.46 |
| prl_NOZYBIMUF | -1.18 | 9  | 33.33 |
| prl_HUPYTUGEZ | 0.85  | 8  | 50.00 |
| prl_WOJISODEV | -2.26 | 14 | 50.00 |
| prl_TIVUSOVUS | -2.16 | 7  | 28.57 |
| prl_KAPUVANUM | -0.15 | 14 | 64.29 |
| prl_SOFEGAKEJ | -2.24 | 11 | 54.55 |
| prl_ZUZYGUMAT | 0.76  | 9  | 33.33 |

---



---

|               |       |    |       |
|---------------|-------|----|-------|
| prl_DAGUFABOD | 0.76  | 8  | 50.00 |
| prl_SAMIZABON | 0.76  | 17 | 35.29 |
| prl_WIPUFIGOM | 0.46  | 13 | 61.54 |
| prl_SOGAZYBUP | -3.03 | 16 | 25.00 |
| prl_DYFEKEFOT | 0.73  | 12 | 66.67 |
| prl_VUDYJEHIN | -1.24 | 8  | 50.00 |
| prl_DYMUPYPIF | -2.23 | 11 | 54.55 |
| prl_MIBAKELUN | -0.24 | 7  | 57.14 |
| prl_VUBOKYWIJ | 0.73  | 18 | 61.11 |
| prl_ZOPAKYTOB | 0.73  | 12 | 58.33 |
| prl_LUJOVINEM | -0.2  | 14 | 50.00 |
| prl_FIDALODEN | -0.15 | 22 | 31.82 |
| prl_JYKODYJYD | 0.76  | 7  | 42.86 |
| prl_GAPYVUFIL | 0.8   | 7  | 57.14 |
| prl_LAMANADIZ | 0.4   | 12 | 16.67 |
| prl_VYSILUPYH | -1.15 | 12 | 25.00 |
| prl_LIHOKOVUF | -0.24 | 10 | 40.00 |
| prl_SEKAJOMOK | -2.23 | 9  | 22.22 |
| prl_HOPABYJAT | 0.73  | 10 | 30.00 |
| prl_PATUKOZOS | -0.26 | 12 | 58.33 |
| prl_TATYKOSOH | -1.5  | 7  | 57.14 |
| prl_WYPAHYJUS | 0.76  | 11 | 45.45 |
| prl_KUNYPOJOS | 0.55  | 12 | 33.33 |
| prl_KETOVUFAK | -0.18 | 9  | 77.78 |
| prl_KIGIFOTIW | -0.24 | 13 | 61.54 |
| prl_HELYBAZEG | -1.15 | 10 | 60.00 |
| prl_LOGEGYKOS | -0.24 | 7  | 28.57 |
| prl_LAFOZUZUP | -0.26 | 9  | 44.44 |
| prl_BYZAWOHIJ | 0.76  | 14 | 57.14 |
| prl_GOZUBULYS | -1.15 | 12 | 75.00 |
| prl_MUWUPAVYH | -0.15 | 8  | 50.00 |
| prl_JYJENIBIH | -1.23 | 10 | 40.00 |
| prl_BOLUWUGYW | -1.2  | 12 | 50.00 |
| prl_PADAFIMUB | -3.16 | 12 | 41.67 |
| prl_HITAHOKEJ | -3.53 | 9  | 22.22 |
| prl_SOVAKEMAL | -0.15 | 14 | 57.14 |
| prl_DOFOKIBIK | -0.15 | 9  | 66.67 |
| prl_NIKYDOKOP | -0.24 | 7  | 57.14 |
| prl_WAFIPYHUS | -0.04 | 12 | 41.67 |
| prl_WIMITOGIS | -1.2  | 9  | 33.33 |
| prl_HIZEVOLIT | 0.4   | 13 | 61.54 |
| prl_ZENAGUJOS | -0.24 | 11 | 36.36 |
| prl_VYZOWIPUS | -0.26 | 16 | 25.00 |
| prl_MIHABIDUB | -3.53 | 10 | 20.00 |
| prl_WUDYBAWAN | 0.79  | 7  | 42.86 |
| prl_LOPUZYBUK | -0.24 | 10 | 60.00 |
| prl_ZABEMUJAK | 0.4   | 9  | 0.00  |
| prl_FUWYHYMOL | -0.15 | 9  | 44.44 |
| prl_VYJYKAKAL | -0.54 | 8  | 12.50 |
| prl_HYVYVOKEH | -0.15 | 11 | 9.09  |
| prl_GUZANIFIH | -0.26 | 11 | 36.36 |

---

---

|               |       |    |       |
|---------------|-------|----|-------|
| prl_SELIDOGEL | -0.24 | 7  | 28.57 |
| prl_FEWIZUZAG | -2.24 | 13 | 53.85 |
| prl_WIBUMUHYS | 0.74  | 18 | 44.44 |
| prl_FEPEFENEH | -1.26 | 7  | 85.71 |
| prl_ZEPAJUVAM | -1.26 | 10 | 40.00 |
| prl_TOMOFOGOH | -2.15 | 16 | 31.25 |
| prl_GUDYKEVUM | -0.15 | 14 | 57.14 |
| prl_LIDYBAPOL | 0.04  | 8  | 25.00 |
| prl_GAFAWULUH | -3.19 | 12 | 41.67 |
| prl_VIGYVUBON | 0.73  | 9  | 55.56 |
| prl_WYDYHOBYN | -2.15 | 17 | 17.65 |
| prl_BIGEWUPOW | -1.44 | 17 | 41.18 |
| prl_PUHUWUGIK | 0.76  | 7  | 85.71 |
| prl_VUSIGULOG | -0.25 | 9  | 55.56 |
| prl_WUGETIHAV | -1.24 | 7  | 57.14 |
| prl_TEZESOBII | -0.26 | 16 | 37.50 |
| prl_SUTYNIJYK | -4.07 | 16 | 37.50 |
| prl_DOHIWEWYD | -1.24 | 7  | 71.43 |
| prl_MIJYZYNEZ | -1.23 | 8  | 37.50 |
| prl_NEJONAHET | -1.24 | 16 | 31.25 |
| prl_SISEZEZAV | -1.23 | 11 | 45.45 |
| prl_ZUTYFADEG | -0.17 | 12 | 41.67 |
| prl_KAGAVUWOF | -2.14 | 16 | 37.50 |
| prl_VESEJAMUP | 0.82  | 11 | 54.55 |
| prl_KEPUBYMIB | -1.15 | 14 | 21.43 |
| prl_PEGOWAVOJ | 0.8   | 10 | 60.00 |
| prl_ZITUZUFAN | -1.24 | 8  | 50.00 |
| prl_MUZYDEBUD | 0.82  | 12 | 58.33 |
| prl_DIZOGOMIK | -0.26 | 14 | 42.86 |
| prl_MUPIVAVUJ | -0.15 | 13 | 23.08 |
| prl_VEWYDYBIG | -1.24 | 13 | 46.15 |
| prl_PYBOHULAF | -0.12 | 12 | 58.33 |
| prl_BUKIDANYM | 0.73  | 14 | 42.86 |
| prl_BIPUWELUP | -0.54 | 9  | 44.44 |
| prl_KIKUJEHYV | -1.6  | 10 | 80.00 |
| prl_KUDUHEMUH | -0.23 | 14 | 28.57 |
| prl_ZALEDIPEZ | 0.76  | 16 | 18.75 |
| prl_HOVIBUSUB | -1.24 | 12 | 50.00 |
| prl_NIDATYZEZ | -0.54 | 7  | 42.86 |
| prl_JYBOMEMUN | -1.24 | 12 | 25.00 |
| prl_TAZESEFEF | -0.24 | 7  | 14.29 |
| prl_SUNITOVYS | -1.5  | 7  | 85.71 |
| prl_LUJABIDUD | -0.16 | 12 | 33.33 |
| prl_DIMOVILUV | -0.54 | 12 | 33.33 |
| prl_LIPYBYWYB | -0.24 | 10 | 50.00 |
| prl_GEFOWUMIZ | 0.76  | 8  | 50.00 |
| prl_DIWYGELUP | 0.85  | 13 | 46.15 |
| prl_FAGIPAWEM | -2.6  | 23 | 17.39 |
| prl_VOSAJYFIT | -1.27 | 8  | 50.00 |
| prl_LEPEMYMUD | -0.6  | 8  | 37.50 |
| prl_DOMAKUNAV | -0.24 | 7  | 57.14 |

---

---

|               |       |    |       |
|---------------|-------|----|-------|
| prl_NYZEKITYD | -3.17 | 11 | 45.45 |
| prl_MATIZEHEH | -1.24 | 12 | 16.67 |
| prl_LEHAMELAZ | -0.24 | 10 | 50.00 |
| prl_ZUDAJEGIK | -2.23 | 10 | 30.00 |
| prl_BYJAPOWOH | -0.24 | 11 | 54.55 |
| prl_NYTYHODUZ | -1.15 | 11 | 72.73 |
| prl_FYGYPIYIW | 0.4   | 7  | 14.29 |
| prl_TONAJEDEC | -2.16 | 7  | 57.14 |
| prl_ZANOSAPED | -0.24 | 12 | 83.33 |
| prl_BEFIMOLOP | 0.76  | 7  | 42.86 |
| prl_NOZISYPOK | 0.46  | 7  | 28.57 |
| prl_WASUSOLUF | 0.76  | 8  | 25.00 |
| prl_BEGUDYKAT | -1.16 | 16 | 43.75 |
| prl_JUZUFECEK | -1.24 | 19 | 21.05 |
| prl_DABOMIZYJ | -2.16 | 7  | 28.57 |
| prl_SYJUKUDYN | -2.24 | 8  | 25.00 |
| prl_ZETOMUMYD | -1.26 | 17 | 29.41 |
| prl_PYSOTIGET | -0.24 | 7  | 42.86 |
| prl_BEMOZALUH | -1.16 | 15 | 26.67 |
| prl_FIGUVUPYH | -1.24 | 8  | 75.00 |
| prl_DYBEJANAG | 0.76  | 8  | 62.50 |
| prl_JASUJIMUF | -0.24 | 7  | 42.86 |
| prl_HULEDEZYG | -2.23 | 13 | 38.46 |
| prl_BYPEWOLIL | -2.23 | 13 | 38.46 |
| prl_NITEPAWON | -0.15 | 13 | 46.15 |
| prl_MYVEVOBAS | 0.76  | 10 | 50.00 |
| prl_DEKEPUKYB | 1.79  | 8  | 50.00 |
| prl_DUTEJYHYP | -0.24 | 9  | 66.67 |
| prl_HEKULEGIG | -0.54 | 12 | 41.67 |
| prl_VUFYNAFIV | -0.23 | 11 | 45.45 |
| prl_KIBEGABYB | 0.8   | 9  | 44.44 |
| prl_DAFIKOTEG | 0.76  | 7  | 42.86 |
| prl_KYPAFOJAG | -0.24 | 9  | 55.56 |
| prl_METAFEVIF | -0.12 | 20 | 30.00 |
| prl_PEZUMEVYS | 0.85  | 21 | 57.14 |
| prl_GAHIKANUK | -1.26 | 21 | 57.14 |
| prl_NINEGODOF | -0.24 | 12 | 33.33 |
| prl_VUFIMOZYK | -0.24 | 11 | 45.45 |
| prl_WYSUZAHOH | -0.24 | 8  | 50.00 |
| prl_VUTAFYKUV | 0.76  | 11 | 9.09  |
| prl_FIFUJATED | -1.26 | 8  | 37.50 |
| prl_ZAPOWOJIN | -1.26 | 17 | 29.41 |
| prl_LIMOSIWAD | -0.24 | 7  | 28.57 |
| prl_SEHIGISUM | -0.54 | 8  | 12.50 |
| prl_DYMAHALAN | -1.06 | 23 | 21.74 |
| prl_HYZYBODAG | 0.46  | 10 | 40.00 |
| prl_MEGIHIIH  | -1.16 | 7  | 57.14 |
| prl_TUKUWOLEF | 0.85  | 7  | 14.29 |
| prl_JUKYJAGUB | -0.24 | 9  | 22.22 |
| prl_LUBUFUBYG | 0.76  | 11 | 18.18 |
| prl_FUFOJEHEB | 0.76  | 13 | 46.15 |

---

---

|               |       |    |       |
|---------------|-------|----|-------|
| prl_HYGEHOGAS | 0.76  | 14 | 21.43 |
| prl_DUPIHOHAP | -6.53 | 37 | 27.03 |
| prl_HYBIKEZYV | -0.6  | 12 | 58.33 |
| prl_KUJUVONOP | -0.6  | 9  | 44.44 |
| prl_VYBOTEHUT | 0.79  | 11 | 27.27 |
| prl_SUWYMETAW | -0.15 | 11 | 18.18 |
| prl_SEKEWYTIG | 0.82  | 11 | 54.55 |
| prl_KIMAFEBIS | -1.23 | 10 | 20.00 |
| prl_DOBAWOWAN | -1.24 | 13 | 23.08 |
| prl_DOBOZUGUP | -1.26 | 14 | 35.71 |
| prl_MIJYKYSOH | -1.24 | 10 | 50.00 |
| prl_GIJYBETEM | -1.24 | 9  | 44.44 |
| prl_LYNOBIZEW | -2.23 | 22 | 68.18 |
| prl_ZYMOFEDED | -1.15 | 9  | 66.67 |
| prl_LUWOWUTEZ | 0.46  | 7  | 14.29 |
| prl_VYLEWANIT | -0.24 | 8  | 62.50 |
| prl_HABUMENUN | -0.15 | 7  | 28.57 |
| prl_BOLOTYSOH | -0.15 | 15 | 53.33 |
| prl_JOFUSUWUB | 0.76  | 9  | 44.44 |
| prl_JETUVYHUH | -3.23 | 13 | 61.54 |
| prl_NIMAJIWIK | -0.24 | 10 | 30.00 |
| prl_FIJYNASUP | -0.24 | 17 | 35.29 |
| prl_MYFOMOBYL | 0.8   | 13 | 30.77 |
| prl_FYFOLIDAD | -0.18 | 18 | 50.00 |
| prl_SOJODIWOP | -0.15 | 13 | 30.77 |
| prl_ZIKAWABYS | -0.15 | 10 | 40.00 |
| prl_WUTUGIBOD | -1.23 | 9  | 44.44 |
| prl_MYNIWITUG | -1.08 | 8  | 37.50 |
| prl_FUZAFAJOZ | -1.24 | 8  | 50.00 |
| prl_JEMYFIFIV | 0.76  | 13 | 46.15 |
| prl_BEZAZALEZ | -0.54 | 11 | 45.45 |
| prl_FYSOGOPIT | -2.23 | 15 | 40.00 |
| prl_MAZEHAWIB | -0.24 | 8  | 50.00 |
| prl_ZEFYTYMOP | -0.15 | 12 | 41.67 |
| prl_KYVYZYMIB | -1.26 | 11 | 18.18 |
| prl_NOPOFYBIW | -1.23 | 10 | 20.00 |
| prl_SYFAZEDEW | -0.24 | 7  | 42.86 |
| prl_TABOTOPOT | 0.76  | 16 | 31.25 |
| prl_HIPIPAMOH | -0.54 | 7  | 42.86 |
| prl_NYWYNITIJ | 0.76  | 11 | 45.45 |
| prl_FEMYTIMOZ | -0.24 | 9  | 33.33 |
| prl_GONUJEBAZ | -1.23 | 11 | 54.55 |
| prl_ZUJOGULOJ | -0.51 | 9  | 44.44 |
| prl_DYTENEJYZ | -2.53 | 18 | 22.22 |
| prl_ZOGEFOPYT | -1.26 | 15 | 60.00 |
| prl_KAFUTALYZ | -2.24 | 11 | 36.36 |
| prl_VYDAJIJUT | 0.74  | 13 | 23.08 |
| prl_GATUDOGOJ | 0.76  | 7  | 28.57 |
| prl_ZUWASELEN | -1.6  | 9  | 77.78 |
| prl_LILIBEFYG | -1.24 | 12 | 75.00 |
| prl_JEJIMUKAZ | -0.24 | 10 | 40.00 |

---

---

|               |       |    |       |
|---------------|-------|----|-------|
| prl_NEZYKUFYT | 0.76  | 9  | 44.44 |
| prl_SISYMASYD | −0.15 | 8  | 50.00 |
| prl_LIWOGADON | 0.76  | 9  | 44.44 |
| prl_PIWYBYKEZ | −1.26 | 15 | 53.33 |
| prl_GYKOZYPYF | −0.6  | 8  | 62.50 |
| prl_JAHYHYTIZ | −3.51 | 14 | 42.86 |
| prl_SYBAWATYP | −0.06 | 16 | 37.50 |
| prl_FINOGENEZ | −3.14 | 20 | 15.00 |
| prl_BOKEKYGAB | 0.73  | 7  | 57.14 |
| prl_TAMIKOLIN | 0.76  | 18 | 27.78 |
| prl_JIZUZEHUD | −1.07 | 16 | 56.25 |
| prl_DEMYVUNAB | 0.76  | 14 | 21.43 |
| prl_DEPIWYVUB | 1.76  | 8  | 37.50 |
| prl_JIFAWELOM | 0.76  | 15 | 33.33 |
| prl_FOLOGODUJ | 1.76  | 12 | 66.67 |
| prl_MAWYBIZIP | −2.26 | 11 | 54.55 |
| prl_PIDIDOJOS | −0.24 | 7  | 28.57 |
| prl_KAPIGOTOM | −0.2  | 8  | 25.00 |
| prl_WIHOGESUV | −0.24 | 10 | 70.00 |
| prl_JOWOFEJUM | −1.15 | 13 | 30.77 |
| prl_FIZUNUKIF | 0.4   | 8  | 12.50 |
| prl_DEKAHUFIP | −0.15 | 10 | 50.00 |
| prl_POGAPYSIW | −0.12 | 12 | 58.33 |
| prl_TAZOFUTEV | −0.24 | 23 | 47.83 |
| prl_FOBYLUZUD | 0.73  | 12 | 41.67 |
| prl_TANETUNUL | −1.04 | 9  | 44.44 |
| prl_VUDESUWUP | 0.8   | 11 | 63.64 |
| prl_DYKIZEDUW | 0.76  | 7  | 57.14 |
| prl_KYGIWIZUZ | 0.76  | 16 | 43.75 |
| prl_DYDAKASYB | 1.76  | 11 | 45.45 |
| prl_MYBOTOBAB | 0.73  | 8  | 50.00 |
| prl_FOKIPYVIM | −2.24 | 9  | 55.56 |
| prl_NYSYWIMIJ | −1.15 | 13 | 46.15 |
| prl_ZYWEKONES | −0.07 | 7  | 42.86 |
| prl_PATENUHEK | 0.8   | 11 | 45.45 |
| prl_PYFYBAJIT | −0.24 | 10 | 40.00 |
| prl_FAJEPUSUK | −0.24 | 11 | 27.27 |
| prl_TUHEGEJED | −0.07 | 8  | 50.00 |
| prl_SEFAHUWUJ | −1.23 | 9  | 44.44 |
| prl_HYTYPABEF | −0.26 | 11 | 45.45 |
| prl_BUFEWUFUD | −0.23 | 13 | 30.77 |
| prl_MEMOVOVYL | −2.4  | 20 | 55.00 |
| prl_POJETYKYT | −0.15 | 12 | 50.00 |
| prl_DEGIDEBOL | −1.23 | 17 | 41.18 |
| prl_POMUDEWAT | −0.15 | 15 | 46.67 |
| prl_JODIGEFUG | 0.79  | 10 | 30.00 |
| prl_KOGEWYDIH | −2.24 | 7  | 57.14 |
| prl_JYSOZEHAH | −1.24 | 12 | 50.00 |
| prl_NETUFYLOM | 0.76  | 7  | 28.57 |
| prl_FOKUMETKY | 0.76  | 18 | 27.78 |
| prl_TISUNIWET | −2.26 | 11 | 54.55 |

---

---

|                 |       |    |       |
|-----------------|-------|----|-------|
| prl_TYLYDUDEG   | −1.15 | 7  | 14.29 |
| prl_DEVYJYVEH   | 1.76  | 11 | 63.64 |
| prl_NIDIZEVOK   | 0.76  | 14 | 50.00 |
| prl_VINOZUJUZ   | 0.76  | 15 | 26.67 |
| prl_BUFENAHYS   | −0.17 | 14 | 28.57 |
| prl_GEDIDEFYP   | −0.2  | 13 | 53.85 |
| prl_GATIWENON   | −0.12 | 7  | 57.14 |
| prl_GONUDYPAT   | −3.2  | 13 | 38.46 |
| prl_KUHYJYPAH   | −0.24 | 10 | 20.00 |
| prl_SYNAHIMOG   | 0.76  | 15 | 40.00 |
| prl_GOWIMAGIK   | 0.76  | 17 | 52.94 |
| prl_LEJYNYHOM   | −1.15 | 13 | 69.23 |
| prl_JEDYTYWOP   | 1.79  | 10 | 20.00 |
| prl_TEBOPYHUD   | −1.15 | 8  | 37.50 |
| prl_NEDIKYFEL   | 0.85  | 17 | 35.29 |
| prl_JYWYLAKEL   | −1.12 | 23 | 39.13 |
| prl_VILYJYJUB   | −1.24 | 10 | 0.00  |
| prl_VYKABYWEF   | −0.24 | 8  | 50.00 |
| prl_BEMASUNAP   | −0.6  | 11 | 45.45 |
| prl_KEZUDELUK   | 0.46  | 11 | 36.36 |
| prl_KEDAVITIL   | −0.24 | 8  | 50.00 |
| prl_DYKYMAVYM   | 0.04  | 11 | 36.36 |
| prl_FONUGAKAJ   | −2.18 | 10 | 60.00 |
| prl_GAJEZEFAFAM | −1.18 | 15 | 46.67 |
| prl_GODAKULOW   | −0.6  | 10 | 30.00 |
| prl_WOHASYVIG   | −1.15 | 8  | 75.00 |
| prl_LASUTUJUN   | 0.76  | 15 | 53.33 |
| prl_POMUZAHYW   | 0.76  | 16 | 43.75 |
| prl_BUTASAKYG   | −0.26 | 16 | 25.00 |
| prl_ZIMODISUZ   | 0.76  | 7  | 57.14 |
| prl_WITOWYPIH   | −1.15 | 7  | 0.00  |
| prl_VUNUFEKUV   | −1.14 | 15 | 20.00 |
| prl_WUVOMYHYG   | −0.24 | 9  | 55.56 |
| prl_ZIZIFISIK   | 0.76  | 9  | 22.22 |
| prl_SIBIHIKYD   | −0.15 | 13 | 38.46 |
| prl_HESOBAGIF   | −0.24 | 10 | 40.00 |
| prl_WUZUPEVEK   | 0.73  | 11 | 72.73 |
| prl_JYDOGUHOV   | 0.76  | 11 | 36.36 |
| prl_NOTEZEZIK   | −1.26 | 7  | 28.57 |
| prl_DAVUMAFUS   | −1.15 | 9  | 55.56 |
| prl_VEFIWINIW   | −0.15 | 7  | 42.86 |
| prl_GIFIVOKAP   | −1.24 | 15 | 33.33 |
| prl_KIDENYZOZ   | −0.51 | 10 | 50.00 |
| prl_FEWIMEBEG   | −1.15 | 16 | 18.75 |
| prl_WIKIBYJIW   | 0.5   | 7  | 71.43 |
| prl_JUMUZOMOL   | −1.2  | 9  | 55.56 |
| prl_DAKOWUDAF   | 0.76  | 17 | 35.29 |
| prl_WOTULYWIV   | 0.76  | 10 | 20.00 |
| prl_TYTEPUFAG   | −0.24 | 15 | 33.33 |
| prl_JOGEPUWAS   | −0.26 | 33 | 27.27 |
| prl_NIHINULIJ   | −0.24 | 8  | 50.00 |

---

---

|               |       |    |       |
|---------------|-------|----|-------|
| prl_GIDODIFEG | 0.85  | 14 | 35.71 |
| prl_MEJAFOVYL | -0.24 | 10 | 30.00 |
| prl_FUJETJYP  | -1.15 | 19 | 21.05 |
| prl_GAJAZUMYD | -2.15 | 20 | 15.00 |
| prl_MINYKAMYJ | -2.24 | 11 | 54.55 |
| prl_MEJOWUDOH | 0.76  | 15 | 40.00 |
| prl_BOWEPIKEB | -0.15 | 7  | 57.14 |
| prl_BOKOLAZOZ | -0.24 | 7  | 71.43 |
| prl_BOLAJEKAH | -2.23 | 17 | 29.41 |
| prl_DAHAPOWES | -3.23 | 8  | 37.50 |
| prl_BYWASIKAD | -0.15 | 19 | 26.32 |
| prl_JAHADOTAJ | 0.48  | 13 | 53.85 |
| prl_MAGYBOHAN | -0.24 | 7  | 57.14 |
| prl_KUFIBIZUZ | -1.15 | 18 | 33.33 |
| prl_KIKEZEVYM | -0.24 | 14 | 28.57 |
| prl_NOWYPAFEM | 0.76  | 14 | 35.71 |
| prl_NASYFAZEW | -0.54 | 7  | 42.86 |
| prl_PEWUKAGAT | -2.16 | 8  | 50.00 |
| prl_TAZYJAWOB | 0.76  | 9  | 55.56 |
| prl_HUZYMIJAN | -0.24 | 10 | 20.00 |
| prl_HIHITUZID | -0.15 | 12 | 33.33 |
| prl_NUKAWUSUL | 0.96  | 11 | 36.36 |
| prl_VEBOMUZOD | -0.15 | 13 | 53.85 |
| prl_GUHUSAVYV | 0.73  | 12 | 33.33 |
| prl_MULESUTEJ | 0.76  | 8  | 50.00 |
| prl_NYMUKEWIL | -0.15 | 13 | 38.46 |
| prl_KELEVUJYP | -1.11 | 33 | 42.42 |
| prl_FITAKAJET | -0.24 | 11 | 36.36 |
| prl_FOJYFOMOD | -0.15 | 8  | 37.50 |
| prl_GYFYNEZAD | -0.15 | 21 | 19.05 |
| prl_JEGIVAMAJ | -1.24 | 10 | 50.00 |
| prl_HEHAVUDAS | -2.04 | 20 | 20.00 |
| prl_KEMYZIJUF | -0.24 | 7  | 42.86 |
| prl_HYHYJOKEW | 0.76  | 9  | 55.56 |
| prl_BIZUBOVAT | 0.82  | 10 | 50.00 |
| prl_FOPEDIMYS | -5.23 | 34 | 29.41 |
| prl_PODELYPUV | -2.23 | 19 | 26.32 |
| prl_VYLOMUHYT | -2.11 | 11 | 45.45 |
| prl_JAVEJIWUG | -0.24 | 12 | 66.67 |
| prl_ZUGELANOS | 0.76  | 14 | 42.86 |
| prl_DAZIGOVAM | 0.4   | 9  | 22.22 |
| prl_LELEPYTUD | -0.24 | 9  | 44.44 |
| prl_HOPIHEKEF | 0.73  | 17 | 41.18 |
| prl_TUDYJYDON | 0.85  | 10 | 50.00 |
| prl_TALYGUFUF | -1.24 | 13 | 46.15 |
| prl_HUNALIVYP | -4.53 | 29 | 24.14 |
| prl_BIPAVETOD | -1.54 | 7  | 14.29 |
| prl_HEBEKEWYN | -0.26 | 13 | 46.15 |
| prl_KYJEPJYN  | 0.85  | 18 | 27.78 |
| prl_JEWUDONUB | -0.24 | 12 | 25.00 |
| prl_MAHULAJIZ | -0.54 | 10 | 60.00 |

---

---

|                 |       |    |       |
|-----------------|-------|----|-------|
| prl_FILUPIKAV   | −2.45 | 18 | 50.00 |
| prl_ZEDUPILUT   | −2.24 | 12 | 58.33 |
| prl_KAGUTIGEF   | −0.15 | 11 | 36.36 |
| prl_MYJEPOWYH   | 0.49  | 8  | 12.50 |
| prl_TUNYJYZOD   | 0.76  | 8  | 50.00 |
| prl_NENALYBOW   | −2.2  | 7  | 57.14 |
| prl_VYFOHYMIP   | −1.17 | 10 | 40.00 |
| prl_DIKINAMIF   | −0.15 | 7  | 28.57 |
| prl_VONYFYFYPAL | −0.24 | 11 | 63.64 |
| prl_PAHEVYTOB   | 1.76  | 21 | 42.86 |
| prl_PANEPEDUT   | −0.16 | 10 | 40.00 |
| prl_GUFIVYBOD   | −2.16 | 8  | 62.50 |
| prl_NUVAWYVYM   | −0.24 | 11 | 45.45 |
| prl_KIBYKIZEH   | 0.76  | 10 | 50.00 |
| prl_MIZUNAFIZ   | −3.23 | 10 | 40.00 |
| prl_ZOFUSAZAV   | −0.24 | 9  | 22.22 |
| prl_ZIFOVUJUP   | −1.24 | 9  | 33.33 |
| prl_WIFYVEVEN   | 0.46  | 9  | 44.44 |
| prl_FUNUPUBAZ   | 0.73  | 7  | 57.14 |
| prl_VIHIDOFEL   | −1.24 | 10 | 50.00 |
| prl_TOKEBONOD   | −0.15 | 7  | 57.14 |
| prl_NYGYGUVIP   | 0.73  | 8  | 62.50 |
| prl_BUJIVETON   | 0.8   | 10 | 30.00 |
| prl_HIJEVEJAJ   | 0.76  | 13 | 30.77 |
| prl_LYHALYWYF   | −0.6  | 11 | 36.36 |
| prl_FOBAWEVIZ   | 0.74  | 22 | 31.82 |
| prl_GYFATULOT   | 0.76  | 14 | 35.71 |
| prl_LIMEJANIL   | 0.76  | 8  | 12.50 |
| prl_NYMULEWUN   | −1.23 | 12 | 33.33 |
| prl_NULOGUZYL   | 0.76  | 10 | 40.00 |
| prl_DUSYPOPAZ   | −0.6  | 7  | 71.43 |
| prl_FIHULAFOV   | −1.17 | 7  | 71.43 |
| prl_JYNATEZUK   | 0.46  | 7  | 28.57 |
| prl_HUFOTAHIN   | 0.76  | 13 | 46.15 |
| prl_FOWYHOLOS   | 0.76  | 8  | 37.50 |
| prl_NIPEKOZYK   | −1.24 | 15 | 33.33 |
| prl_NYJUWUNIG   | −1.15 | 12 | 75.00 |
| prl_ZASENIVIT   | −0.24 | 13 | 30.77 |
| prl_SAZAPYGEH   | 0.76  | 10 | 10.00 |
| prl_KEGEDENYN   | −0.24 | 12 | 41.67 |
| prl_PAGAZESUZ   | −2.51 | 12 | 16.67 |
| prl_VIWUBEMAK   | −0.12 | 7  | 57.14 |
| prl_LIBEPIPYN   | −0.24 | 10 | 20.00 |
| prl_LEMEJALYT   | −0.15 | 10 | 30.00 |
| prl_VYGAWUHAP   | 0.76  | 8  | 25.00 |
| prl_ZAFUKUFOF   | −0.2  | 8  | 62.50 |
| prl_WYSEWYFUK   | −1.24 | 8  | 50.00 |
| prl_GIHOGINEK   | 0.8   | 9  | 33.33 |
| prl_NOMADEWUF   | 0.76  | 10 | 30.00 |
| prl_JIPYKIHAN   | −0.15 | 7  | 42.86 |
| prl_MAJYTUMIJ   | −1.24 | 11 | 27.27 |

---



---

|               |       |    |       |
|---------------|-------|----|-------|
| prl_POBEZAZYP | -2.14 | 11 | 54.55 |
| prl_BESOWEFOD | 0.76  | 12 | 66.67 |
| prl_LIVOBEBAJ | 0.79  | 10 | 20.00 |
| prl_NAZYNEKAD | -1.26 | 17 | 23.53 |
| prl_WOBOZODEK | -1.24 | 10 | 70.00 |
| prl_VENYKUFUW | -1.04 | 12 | 41.67 |
| prl_LULAZASUW | -0.24 | 9  | 66.67 |
| prl_PEFEMUSAT | -1.54 | 8  | 50.00 |
| prl_JYLEGIFEG | 0.73  | 9  | 66.67 |
| prl_SIFIFIMEJ | -1.54 | 8  | 62.50 |
| prl_MULUWYFEK | 0.76  | 9  | 22.22 |
| prl_GEGEFEKUD | -2.54 | 10 | 30.00 |
| prl_JOVEHYSIG | -0.54 | 11 | 9.09  |
| prl_TADAGEBOW | -2.14 | 11 | 63.64 |
| prl_JEVUGOBAT | -0.24 | 8  | 25.00 |
| prl_TYZYNETAF | -2.15 | 10 | 40.00 |
| prl_PABAWELOB | 0.76  | 7  | 57.14 |
| prl_WUGOJABYK | -0.24 | 13 | 30.77 |
| prl_FEDADOPIV | 0.76  | 17 | 41.18 |
| prl_KEHEGEVOT | -0.24 | 9  | 22.22 |
| prl_WUJELEKEJ | -1.24 | 8  | 75.00 |
| prl_PIJEJIZAF | -0.24 | 11 | 36.36 |
| prl_TAJAWAFAN | 0.76  | 12 | 50.00 |
| prl_VAHOZIGAM | 1.76  | 13 | 53.85 |
| prl_MEDAZUHEZ | -1.15 | 17 | 29.41 |
| prl_FUNUGYFOW | -0.54 | 13 | 53.85 |
| prl_VIDAWOHIP | 0.76  | 8  | 75.00 |
| prl_BOVOVIZYV | -1.15 | 16 | 31.25 |
| prl_SOZIZOHOP | -0.24 | 9  | 22.22 |
| prl_BISOLAVOF | -2.24 | 8  | 50.00 |
| prl_HANYPIPYB | -1.16 | 10 | 50.00 |
| prl_WYKUFEPET | -1.23 | 10 | 30.00 |
| prl_WEMUTAPOD | -3.23 | 14 | 21.43 |
| prl_ZUDONYWEM | 3.76  | 13 | 30.77 |
| prl_GISAMADUH | -0.24 | 9  | 33.33 |
| prl_VOJAHUMYP | 0.4   | 15 | 20.00 |
| prl_GIMOLOSJ  | -2.24 | 14 | 28.57 |
| prl_LYVEDAKEM | -2.53 | 8  | 25.00 |
| prl_NOVOBANET | -1.16 | 8  | 62.50 |
| prl_FENIJEMOD | -1.24 | 11 | 18.18 |
| prl_MYPIFYVEV | -1.24 | 15 | 66.67 |
| prl_WUSESOKAF | -0.17 | 10 | 20.00 |
| prl_WUVAHEHET | -0.24 | 7  | 28.57 |
| prl_NIWALYJYV | -2.15 | 10 | 60.00 |
| prl_TANIWAPIK | 1.73  | 10 | 50.00 |
| prl_PEVINOMOK | 0.76  | 11 | 45.45 |
| prl_VUMUKYGEK | -2.14 | 11 | 54.55 |
| prl_GELUVESAL | -0.2  | 7  | 71.43 |
| prl_HEHOHISUV | 0.76  | 10 | 40.00 |
| prl_DIZOLASAH | 0.76  | 10 | 30.00 |
| prl_ZUKUPOPUG | -0.15 | 8  | 37.50 |

---

---

|               |       |    |       |
|---------------|-------|----|-------|
| prl_DIMYWULYH | −0.24 | 10 | 20.00 |
| prl_KUSYLOLYF | −0.24 | 14 | 64.29 |
| prl_JILISEWEP | −2.15 | 10 | 30.00 |
| prl_GAFAFUVAH | 0.76  | 7  | 28.57 |
| prl_KYWOKYJIV | −2.53 | 17 | 23.53 |
| prl_JUWEGUMIM | −2.14 | 13 | 15.38 |
| prl_FUNIWAMYL | −3.07 | 13 | 53.85 |
| prl_SAFOWUPEK | −0.24 | 7  | 57.14 |
| prl_SEMEMIFOB | 0.73  | 12 | 50.00 |
| prl_FYNIPABUS | −1.03 | 7  | 28.57 |
| prl_TULYGYZUN | −0.24 | 8  | 62.50 |
| prl_JIKOZYFUG | −0.15 | 19 | 31.58 |
| prl_KABUSEDED | −1.24 | 9  | 33.33 |
| prl_SUTETILYZ | −2.23 | 16 | 56.25 |
| prl_HAJYBILYM | −0.15 | 7  | 42.86 |
| prl_FYBAFOBET | −1.15 | 13 | 23.08 |
| prl_KAGYTAWEF | 0.76  | 9  | 44.44 |
| prl_KINYJYWOJ | −1.16 | 13 | 53.85 |
| prl_JELAWIFIV | −3.15 | 9  | 33.33 |
| prl_HIJAHOHOP | 0.85  | 11 | 54.55 |
| prl_KIMAVYGAG | 0.46  | 7  | 42.86 |
| prl_SYLEBAJEM | −2.23 | 14 | 21.43 |
| prl_JEHOPUJAV | −1.15 | 12 | 66.67 |
| prl_MONEJEMIW | 1.5   | 9  | 55.56 |
| prl_DYSUDEPUN | 0.73  | 10 | 50.00 |
| prl_GUVIVEWEM | −2.23 | 10 | 20.00 |
| prl_ZAHAWAFUT | 0.85  | 14 | 50.00 |
| prl_SYJUFOHIM | 0.76  | 10 | 40.00 |
| prl_DIZIGYWEP | −2.53 | 18 | 38.89 |
| prl_BUSOKYSUN | −0.24 | 12 | 50.00 |
| prl_NUHYVIFYS | −1.24 | 11 | 27.27 |
| prl_WOGOYUFAS | 0.73  | 13 | 53.85 |
| prl_KINIHYBIT | −1.16 | 10 | 20.00 |
| prl_VAPYFIHEF | −0.24 | 15 | 26.67 |
| prl_WOWESAJEP | −3.19 | 16 | 62.50 |
| prl_VYZELYPAL | −2.24 | 9  | 66.67 |
| prl_PEJYPYZEL | −0.15 | 17 | 47.06 |
| prl_HAWIHYTIT | −0.24 | 9  | 44.44 |
| prl_ZIMAKIHUG | −2.23 | 7  | 28.57 |
| prl_MIMAHESOD | 0.76  | 12 | 58.33 |
| prl_DONEMUNEW | 0.8   | 11 | 81.82 |
| prl_NAMYZYKEZ | −0.24 | 8  | 12.50 |
| prl_MUTESUFYL | −2.24 | 7  | 42.86 |
| prl_WUWUBIPEN | −1.54 | 9  | 44.44 |
| prl_PYNITYMUH | −2.24 | 23 | 43.48 |
| prl_ZUJISOZEL | −0.6  | 7  | 28.57 |
| prl_GENEBAHUJ | −1.24 | 14 | 42.86 |
| prl_FIFEZAVYF | −1.6  | 7  | 14.29 |
| prl_KOZITYBEP | −1.16 | 8  | 62.50 |
| prl_KYWASOSEW | −0.15 | 8  | 37.50 |
| prl_KOSYGYBIZ | −0.6  | 7  | 42.86 |

---

---

|               |       |    |       |
|---------------|-------|----|-------|
| prl_BUHEPUJYN | -0.24 | 11 | 27.27 |
| prl_HILUBEVIS | -0.15 | 12 | 50.00 |
| prl_SAWIDYDUN | -1.15 | 13 | 69.23 |
| prl_FAHOMALYV | -0.45 | 11 | 45.45 |
| prl_NALILUBIN | -1.16 | 9  | 11.11 |
| prl_SIGIBEKAN | -2.23 | 13 | 53.85 |
| prl_KYNOPESYF | -2.23 | 13 | 7.69  |
| prl_GIVASIZUZ | -3.15 | 15 | 13.33 |
| prl_FAJYNUPEN | -1.23 | 15 | 20.00 |
| prl_ZUJODUMEN | 0.96  | 10 | 40.00 |
| prl_WOMINEWEH | -1.24 | 9  | 44.44 |
| prl_PIFOPYPOF | -0.15 | 14 | 50.00 |
| prl_GATIJJYP  | -2.17 | 27 | 33.33 |
| prl_WYZILEMEJ | -1.24 | 9  | 33.33 |
| prl_KEDYTIGIT | -0.24 | 13 | 23.08 |
| prl_PYFIDOWUM | -0.24 | 13 | 15.38 |
| prl_PAJALEWUM | -0.24 | 14 | 35.71 |
| prl_PAWIHESIH | -1.5  | 12 | 25.00 |
| prl_TUFOSYKAW | -1.2  | 9  | 55.56 |
| prl_ZUPASEDOD | -0.07 | 22 | 50.00 |
| prl_KIKESUPEB | -0.54 | 10 | 30.00 |
| prl_FESOFATEW | 1.76  | 8  | 25.00 |
| prl_MAPUGISIM | -0.15 | 15 | 46.67 |
| prl_TEFOSYVUK | 0.73  | 10 | 20.00 |
| prl_JUKEJAVYH | -0.26 | 15 | 46.67 |
| prl_WAHISINYP | -0.24 | 9  | 11.11 |
| prl_JEHAWAGUJ | -0.24 | 14 | 28.57 |
| prl_DYDEVEZYM | -0.23 | 30 | 53.33 |
| prl_ZUHYLYVON | -0.24 | 8  | 50.00 |
| prl_BIKIVIHUM | -2.23 | 8  | 25.00 |
| prl_NOSEDOJOS | -0.24 | 18 | 44.44 |
| prl_TATIDEDID | -0.24 | 8  | 62.50 |
| prl_PAHYSILEK | 0.79  | 16 | 31.25 |
| prl_NYFITUBAH | 0.76  | 14 | 35.71 |
| prl_SYZOZIDIM | -0.15 | 14 | 35.71 |
| prl_PUWEPIMEH | -1.16 | 7  | 28.57 |
| prl_JYVEMEDYG | 0.76  | 9  | 44.44 |
| prl_SOSAWAWAM | -1.27 | 7  | 28.57 |
| prl_DIWUSAPUK | -0.12 | 7  | 57.14 |
| prl_ZOWALAZAH | -3.25 | 12 | 58.33 |
| prl_VEWIMOKYT | 0.76  | 14 | 28.57 |
| prl_GYKUNOTEP | -3.23 | 25 | 28.00 |
| prl_FEGYDYWIS | -7.5  | 22 | 54.55 |
| prl_FOLATEVIM | 0.76  | 8  | 37.50 |
| prl_DEMYHITOT | -0.54 | 8  | 37.50 |
| prl_HIVOFYMAZ | -1.15 | 14 | 64.29 |
| prl_TABUBOTEJ | -0.15 | 9  | 77.78 |
| prl_SAKOLIWYM | -0.45 | 8  | 12.50 |
| prl_WAPISIFAN | -0.27 | 7  | 57.14 |
| prl_PYHYPAPAF | 0.76  | 15 | 46.67 |
| prl_ZIHEGEVON | -1.5  | 12 | 50.00 |

---

---

|                |       |    |       |
|----------------|-------|----|-------|
| prl_KEWYLILIV  | −0.24 | 15 | 66.67 |
| prl_FYBIMOSUL  | −2.08 | 14 | 21.43 |
| prl_POGUZULIH  | −0.16 | 11 | 36.36 |
| prl_DIKAPOKYJ  | −0.15 | 10 | 40.00 |
| prl_MASOFABIP  | 0.76  | 7  | 42.86 |
| prl_PUVOTEZAT  | −2.16 | 7  | 42.86 |
| prl_TENAKAMUS  | −0.17 | 11 | 45.45 |
| prl_WUTASOLAB  | −2.23 | 9  | 33.33 |
| prl_WOKEBEHEB  | −1.24 | 10 | 30.00 |
| prl_ZIGIWABYH  | −2.24 | 12 | 41.67 |
| prl_WEJEGAHYD  | 0.76  | 7  | 42.86 |
| prl_FYJYKUZE   | 0.76  | 8  | 50.00 |
| prl_PODISEJAZ  | −3.06 | 10 | 20.00 |
| prl_VYJEWUKIB  | 0.85  | 7  | 42.86 |
| prl_ZYTOBIMIB  | −0.24 | 8  | 50.00 |
| prl_KYVUZOJYV  | −0.24 | 12 | 8.33  |
| prl_KYWUKEJEL  | 0.79  | 14 | 35.71 |
| prl_NUHUKYSEL  | −1.24 | 11 | 9.09  |
| prl_GUFYKIPAG  | −0.15 | 8  | 50.00 |
| prl_MEJITEZIV  | −1.16 | 7  | 57.14 |
| prl_HUZUHEGIZ  | 0.73  | 9  | 44.44 |
| prl_FODYGOTAN  | −0.24 | 8  | 37.50 |
| prl_FYHUVAMYS  | 0.85  | 15 | 33.33 |
| prl_GELUPUTAF  | −0.6  | 13 | 61.54 |
| prl_WIZYZYMIB  | 0.76  | 11 | 54.55 |
| prl_MYNEBOVOW  | −2.24 | 8  | 62.50 |
| prl_TEHIZILAN  | −0.24 | 12 | 33.33 |
| prl_MEBYNUWAN  | 1.76  | 16 | 62.50 |
| prl_PYVILILYD  | −1.15 | 19 | 31.58 |
| prl_JETUTANOB  | −1.24 | 14 | 50.00 |
| prl_NOBEGUDUK  | 0.73  | 13 | 69.23 |
| prl_ZOFETEGAN  | 0.76  | 9  | 44.44 |
| prl_POBUTEFOL  | −0.17 | 11 | 18.18 |
| prl_JUDINOHYV  | −0.07 | 7  | 28.57 |
| prl_MYWOGEJEL  | −0.24 | 7  | 28.57 |
| prl_GOHUWETAF  | −2.15 | 20 | 50.00 |
| prl_WUBOLUHHIS | −0.24 | 9  | 55.56 |
| prl_KUFOFIWYW  | −0.24 | 8  | 50.00 |
| prl_GEHYTULIS  | −1.16 | 9  | 55.56 |
| prl_HOPOMIHUF  | −0.07 | 18 | 50.00 |
| prl_WIJAPUSIT  | 0.76  | 12 | 50.00 |
| prl_GYGUVUVUN  | −0.04 | 8  | 37.50 |
| prl_GUJYZEHUP  | 0.76  | 9  | 33.33 |
| prl_NONOHITAV  | −0.6  | 7  | 42.86 |
| prl_WEKIMOJUV  | −1.15 | 9  | 55.56 |
| prl_FEHALEFUB  | −0.24 | 14 | 21.43 |
| prl_BIWASIVEB  | −0.24 | 15 | 33.33 |
| prl_NYBAKUNYL  | −0.45 | 9  | 44.44 |
| prl_MEBOMUBOS  | −1.15 | 10 | 60.00 |
| prl_BAWADEVUJ  | −1.5  | 8  | 50.00 |
| prl_GYBAVETYJ  | −2.14 | 16 | 50.00 |

---

---

|               |       |    |       |
|---------------|-------|----|-------|
| prl_KIJANIGAK | 0.76  | 15 | 60.00 |
| prl_MEZOFUKOT | 0.76  | 13 | 15.38 |
| prl_NETUFUPEM | -3.26 | 20 | 55.00 |
| prl_TUNUDUVOH | -0.6  | 7  | 71.43 |
| prl_FYWEWOLET | -0.27 | 14 | 35.71 |
| prl_WIBYHYFYZ | -1.26 | 18 | 33.33 |
| prl_KOZIDAWOP | -0.2  | 12 | 41.67 |
| prl_WUBUFONIL | 0.76  | 19 | 52.63 |
| prl_ZEGEMUNEB | -1.15 | 9  | 55.56 |
| prl_ZUBYVIJYK | -1.54 | 11 | 54.55 |
| prl_PYLYBOWYL | 0.04  | 13 | 46.15 |
| prl_BEMEHUVIN | -2.14 | 14 | 50.00 |
| prl_FYTOTOJEG | -0.24 | 10 | 50.00 |
| prl_BYTAMYBYK | -0.04 | 7  | 57.14 |
| prl_ZEBUBEZAP | 0.85  | 16 | 37.50 |
| prl_KYLYHYVES | -0.15 | 14 | 50.00 |
| prl_GESYFYWAL | -0.24 | 8  | 25.00 |
| prl_JUPALIVYH | -1.16 | 11 | 54.55 |
| prl_JEFIDOTYH | -0.2  | 10 | 50.00 |
| prl_DITOHAGUP | -0.24 | 10 | 60.00 |
| prl_FANAPOVEJ | -3.16 | 10 | 30.00 |
| prl_DYSUKEGEB | -0.24 | 9  | 66.67 |
| prl_WAPUNIWYB | -0.16 | 10 | 40.00 |
| prl_MYDOBONEP | -2.09 | 8  | 50.00 |
| prl_ZIFAVEGUM | 0.76  | 7  | 42.86 |
| prl_SAKULAJED | -2.45 | 10 | 40.00 |
| prl_WIZEMAKAL | 0.76  | 11 | 54.55 |
| prl_SOSIGYNUM | -0.24 | 10 | 40.00 |
| prl_GAKUWYSAV | 0.85  | 14 | 21.43 |
| prl_MAJIBEPEB | -0.24 | 10 | 30.00 |
| prl_DYTESEKEH | -1.24 | 7  | 71.43 |
| prl_WAWATOZUB | -1.24 | 7  | 42.86 |
| prl_HIBISYMAS | 0.8   | 9  | 22.22 |
| prl_SIMOTOJUS | -0.24 | 18 | 22.22 |
| prl_VYMEGAMED | -1.27 | 8  | 50.00 |
| prl_PADUTUKYZ | -0.24 | 16 | 31.25 |
| prl_VYKYNETUG | 0.76  | 11 | 45.45 |
| prl_KIWOGYBAH | 0.76  | 10 | 50.00 |
| prl_DUZUNABIZ | -0.54 | 15 | 20.00 |
| prl_WYTUZESUL | -0.24 | 9  | 44.44 |
| prl_MEWYBUFYV | -2.24 | 8  | 37.50 |
| prl_NIDAZAZAH | -1.23 | 17 | 29.41 |
| prl_NYGYPEVAB | -1.04 | 16 | 68.75 |
| prl_SENEKANOL | -0.24 | 11 | 36.36 |
| prl_VYKYSUTUJ | 0.76  | 8  | 50.00 |
| prl_TEBIDUPES | -0.24 | 10 | 50.00 |
| prl_FEBENYSYM | -0.24 | 8  | 62.50 |
| prl_BYMYGYSAL | -1.21 | 10 | 70.00 |
| prl_NAMOBIGET | -3.23 | 24 | 29.17 |
| prl_HUZIPOVEH | 0.73  | 7  | 57.14 |
| prl_MEZYKIZYW | -2.54 | 18 | 33.33 |

---

---

|                |       |    |       |
|----------------|-------|----|-------|
| prl_MABOBIKUS  | -0.15 | 12 | 50.00 |
| prl_KATUFADAN  | -0.15 | 16 | 50.00 |
| prl_SEHOPEPIH  | -1.18 | 10 | 30.00 |
| prl_KEMYDUWAN  | -0.24 | 13 | 30.77 |
| prl_JIKOKYLOW  | 0.79  | 8  | 25.00 |
| prl_NALUMALUT  | 0.76  | 9  | 22.22 |
| prl_HYVOBYVIF  | -1.15 | 9  | 55.56 |
| prl_PIIHIHUDED | 0.76  | 14 | 50.00 |
| prl_ZIDAKATAF  | -0.24 | 8  | 50.00 |
| prl_JINYKIDAJ  | -1.25 | 10 | 50.00 |
| prl_BAMUZYFAD  | 0.73  | 13 | 46.15 |
| prl_LEVOLAHEL  | -0.15 | 10 | 40.00 |
| prl_NASIPOJOH  | 0.73  | 20 | 60.00 |
| prl_TEMAJAFYG  | -1.16 | 11 | 9.09  |
| prl_FOTIJIKEJ  | -1.26 | 7  | 28.57 |
| prl_PAWOTEJIZ  | -2.15 | 21 | 28.57 |
| prl_LASINUMAH  | 0.82  | 7  | 71.43 |
| prl_PIMITOHUW  | -0.24 | 7  | 42.86 |
| prl_TOZADIWES  | 0.76  | 10 | 50.00 |
| prl_PEBOSYZYM  | -1.24 | 7  | 42.86 |
| prl_VUMETEDOF  | 1.76  | 7  | 14.29 |
| prl_HUZYJUSEN  | -2.15 | 10 | 40.00 |
| prl_PEWYFOJUB  | -3.53 | 14 | 21.43 |
| prl_FAPOSYLEZ  | -3.16 | 10 | 40.00 |
| prl_TIVASASAV  | 0.8   | 12 | 33.33 |
| prl_SUBONENAK  | -0.9  | 9  | 22.22 |
| prl_LOWUDINAL  | -2.15 | 17 | 11.76 |
| prl_PIKUZONOW  | 0.76  | 7  | 14.29 |
| prl_BYDUHENAT  | 0.76  | 14 | 42.86 |
| prl_ZOBISEHEH  | 0.46  | 13 | 53.85 |
| prl_ZAPIDOMUL  | 1.73  | 9  | 44.44 |
| prl_VAKIKOGED  | -0.24 | 11 | 54.55 |
| prl_JYWIWYSOL  | -1.16 | 14 | 21.43 |
| prl_ZEPUBEGOZ  | 1.96  | 15 | 26.67 |
| prl_NUJESAWIN  | -0.08 | 8  | 37.50 |
| prl_DUPUFETOJ  | -1.99 | 10 | 20.00 |
| prl_SOJYMADIM  | -1.23 | 9  | 22.22 |
| prl_LYZODOFYG  | -1.18 | 18 | 27.78 |
| prl_HOVATYBEV  | 1.8   | 19 | 36.84 |
| prl_DYNOHIGYB  | -0.27 | 9  | 55.56 |
| prl_DAHESIJUS  | -0.54 | 13 | 38.46 |
| prl_TOHAZUFOT  | 0.73  | 19 | 57.89 |
| prl_BUZAMUSAM  | 0.73  | 11 | 72.73 |
| prl_ZALUTEHAL  | -0.24 | 7  | 57.14 |
| prl_TOSILISIF  | -0.04 | 10 | 40.00 |
| prl_POKYNONUS  | -0.27 | 14 | 42.86 |
| prl_KUPITOTAS  | 0.76  | 14 | 35.71 |
| prl_BISYBYKUM  | -1.26 | 11 | 45.45 |
| prl_DYBEWOZYS  | 0.85  | 18 | 38.89 |
| prl_LUWEHYHAT  | 1.76  | 10 | 40.00 |
| prl_VOHEBOZEF  | -2.15 | 12 | 58.33 |

---

---

|               |       |    |       |
|---------------|-------|----|-------|
| prl_ZEJOFIJAN | −1.16 | 15 | 40.00 |
| prl_WIBUKIPYS | −1.24 | 8  | 12.50 |
| prl_GYWYVOZUB | −0.2  | 8  | 25.00 |
| prl_KIVOVAFET | −0.24 | 7  | 42.86 |
| prl_VEBUNUTOM | −0.24 | 9  | 44.44 |
| prl_MAGENOSYZ | −0.24 | 9  | 44.44 |
| prl_JIZOSYZUT | −1.24 | 8  | 62.50 |
| prl_SUTEJOBAB | −0.04 | 10 | 50.00 |
| prl_WYGUZUMAS | 0.76  | 11 | 45.45 |
| prl_GUZUWOGEV | −1.15 | 13 | 38.46 |
| prl_FOFAGOZUZ | −1.97 | 11 | 18.18 |
| prl_ZOMYSOMON | −1.26 | 8  | 37.50 |
| prl_HITEGAMIN | −1.23 | 10 | 20.00 |
| prl_KAFOBUKOV | 0.76  | 9  | 44.44 |
| prl_NUHALABID | −1.24 | 14 | 35.71 |
| prl_BENUGENAD | −1.54 | 9  | 44.44 |
| prl_HITESOVYH | 0.76  | 10 | 40.00 |
| prl_ZEWIVYKOJ | 0.85  | 8  | 37.50 |
| prl_HATODOPIT | 0.8   | 20 | 20.00 |
| prl_NYGEVEGOL | 0.76  | 9  | 44.44 |
| prl_JEHUBIBAV | −1.15 | 9  | 33.33 |
| prl_LABEVABEB | −0.24 | 16 | 37.50 |
| prl_PISENETOV | −0.18 | 10 | 80.00 |
| prl_BOFUBEFYK | 0.76  | 11 | 18.18 |
| prl_JAPUVISUJ | −3.51 | 13 | 38.46 |
| prl_FUSABYNUP | −0.24 | 9  | 55.56 |
| prl_NABYDYHYN | −1.18 | 9  | 66.67 |
| prl_TUGIPYFIL | −1.24 | 15 | 26.67 |
| prl_WUHUPIJOS | −2.4  | 9  | 44.44 |
| prl_DESEHIJOG | −2.54 | 12 | 25.00 |
| prl_KYLYJAFOP | −0.24 | 11 | 45.45 |
| prl_PUSEGAZEF | −2.6  | 13 | 15.38 |
| prl_SYZAFYZUJ | 0.76  | 13 | 38.46 |
| prl_TAKUGODYJ | 0.85  | 15 | 33.33 |
| prl_LOGIZITOG | −0.24 | 11 | 27.27 |
| prl_HYVONIMUB | −1.16 | 8  | 62.50 |
| prl_LEPYFAPUP | −0.24 | 12 | 50.00 |
| prl_MAWUBATAW | −0.24 | 9  | 44.44 |
| prl_VINULUJII | −2.24 | 11 | 36.36 |
| prl_PYMEBUPEV | −2.23 | 7  | 28.57 |
| prl_PEMEWAGOG | −1.23 | 9  | 22.22 |
| prl_JOBHAJOG  | −0.24 | 13 | 38.46 |
| prl_HADADOFET | 0.74  | 9  | 44.44 |
| prl_MANINODYL | −1.24 | 13 | 46.15 |
| prl_NOKUVODOF | 0.96  | 15 | 40.00 |
| prl_JOKYBIFED | −3.03 | 12 | 25.00 |
| prl_NEKEHAVYW | 0.73  | 18 | 44.44 |
| prl_FOPEBANAD | 0.8   | 12 | 83.33 |
| prl_KUNAFYKEJ | −0.15 | 8  | 37.50 |
| prl_WEHUMYZIB | −0.15 | 9  | 55.56 |
| prl_NYJUTOLUK | 0.76  | 9  | 55.56 |

---

---

|               |       |    |       |
|---------------|-------|----|-------|
| prl_NOBETULIV | 1.76  | 11 | 63.64 |
| prl_WAPYNEWYW | 0.88  | 10 | 70.00 |
| prl_WOGOVDAN  | -2.14 | 18 | 50.00 |
| prl_HIZILOGOM | 0.05  | 7  | 42.86 |
| prl_JUZUHITOP | -0.27 | 13 | 76.92 |
| prl_GAGUMALAG | -1.15 | 11 | 72.73 |
| prl_DONIJEDEV | -0.24 | 14 | 28.57 |
| prl_TONELATUH | -0.24 | 8  | 62.50 |
| prl_PAVOSYNOS | 0.76  | 12 | 41.67 |
| prl_DYVIKUPOJ | -0.27 | 14 | 42.86 |
| prl_DUVYGIKIW | -2.16 | 8  | 50.00 |
| prl_HOJIDILYD | 0.76  | 10 | 40.00 |
| prl_HYHYBEGAL | -3.26 | 9  | 66.67 |
| prl_NAMUHAPYG | -0.24 | 7  | 57.14 |
| prl_MIBUZUTAB | -0.21 | 11 | 27.27 |
| prl_VYGAVUGAW | -1.17 | 7  | 57.14 |
| prl_GAVULODOS | -1.24 | 12 | 66.67 |
| prl_NYVOVALYL | 0.96  | 10 | 10.00 |
| prl_TITOLETIG | -0.17 | 12 | 41.67 |
| prl_ZIJEMIHOT | -1.24 | 22 | 36.36 |
| prl_JOBITYMYS | -0.24 | 9  | 33.33 |
| prl_DIMYVIPAM | -1.23 | 9  | 33.33 |
| prl_BYJANUDON | -2.23 | 7  | 14.29 |
| prl_TAWIFAHAF | -2.16 | 10 | 30.00 |
| prl_KIKEVYJOL | -1.24 | 17 | 70.59 |
| prl_POLISIKOH | -0.24 | 22 | 31.82 |
| prl_GABUMITAT | -2.23 | 14 | 21.43 |
| prl_MOWIPUVUZ | -0.24 | 13 | 69.23 |
| prl_WOBYTOHYB | -0.2  | 7  | 14.29 |
| prl_VYLUHAHAV | 0.76  | 16 | 50.00 |
| prl_FIKUGAWYK | -0.24 | 11 | 36.36 |
| prl_TALENUDOG | 0.76  | 7  | 14.29 |
| prl_NYGIHIWAS | -1.24 | 14 | 42.86 |
| prl_NATYNIPYH | -2.15 | 19 | 15.79 |
| prl_WEKAPEZED | -0.54 | 7  | 42.86 |
| prl_FEWYJIWYJ | 0.76  | 12 | 41.67 |
| prl_LEKOWAFIV | 0.46  | 11 | 9.09  |
| prl_VIKYZOGIJ | 0.76  | 7  | 57.14 |
| prl_DAHYTUPAP | 1.46  | 10 | 30.00 |
| prl_NYJAKYHIS | -1.45 | 15 | 40.00 |
| prl_BAGIBISUS | 0.76  | 12 | 33.33 |
| prl_PYLUPYLEL | 0.76  | 10 | 50.00 |
| prl_HYHOFAFIK | -2.14 | 14 | 21.43 |
| prl_BOTAWULAV | 1.4   | 8  | 25.00 |
| prl_VUHISEPYM | -2.23 | 10 | 60.00 |
| prl_HYPYTAGAG | 0.46  | 9  | 44.44 |
| prl_PYMYWOGOM | -1.54 | 20 | 30.00 |
| prl_LUTUHEPAD | 0.8   | 10 | 70.00 |
| prl_TAHIKYTUL | -0.24 | 10 | 30.00 |
| prl_DAPYFIJOJ | -1.27 | 10 | 50.00 |
| prl_WIJULOWEN | -0.24 | 7  | 28.57 |

---



---

|               |       |    |       |
|---------------|-------|----|-------|
| prl_WEHYTEVIG | −1.26 | 8  | 50.00 |
| prl_JUPESABAF | −2.26 | 12 | 41.67 |
| prl_MAVELOBOD | −0.24 | 8  | 62.50 |
| prl_GOJIGIFEK | −0.18 | 10 | 80.00 |
| prl_TIMIBOBIT | 1.76  | 11 | 27.27 |
| prl_ZIKONUNEB | −1.26 | 20 | 30.00 |
| prl_GEHAPUGAF | 0.4   | 14 | 21.43 |
| prl_HALETADYN | 1.89  | 18 | 33.33 |
| prl_WITYFAHYS | −0.2  | 11 | 54.55 |
| prl_JOGEDINAB | −0.24 | 9  | 33.33 |
| prl_WIJIDYZEH | 0.73  | 7  | 42.86 |
| prl_VYSAPAWAM | −3.23 | 14 | 50.00 |
| prl_DYWAJOFYV | −0.51 | 10 | 10.00 |
| prl_ZAFOPYHUN | −0.26 | 14 | 50.00 |
| prl_ZANAZIJIZ | 0.76  | 11 | 72.73 |
| prl_NUWOGUVIG | −0.15 | 11 | 45.45 |
| prl_GYPOPAPEL | −1.15 | 10 | 60.00 |
| prl_WAVOMEHIF | 0.85  | 24 | 58.33 |
| prl_LINYZIWED | −2.15 | 10 | 20.00 |
| prl_JAFANONAB | 0.49  | 13 | 53.85 |
| prl_KEJYGIFEP | −1.2  | 14 | 28.57 |
| prl_MOVYSALUL | −0.24 | 11 | 27.27 |
| prl_FEHONELAG | −1.07 | 9  | 22.22 |
| prl_SYLYFEDEB | 0.76  | 7  | 42.86 |
| prl_GUJOBOKYH | −1.23 | 13 | 46.15 |
| prl_TENYGUNAL | −1.41 | 8  | 50.00 |
| prl_ZESOKYVUM | −0.27 | 22 | 59.09 |
| prl_MOTUGYJUK | −0.24 | 8  | 62.50 |
| prl_BAFILASYT | −1.23 | 17 | 23.53 |
| prl_FONIBUGIB | −1.6  | 11 | 36.36 |
| prl_VEBOLAGEP | −2.17 | 27 | 33.33 |
| prl_DYPOMADUM | −0.6  | 11 | 54.55 |
| prl_SYDAWOBAL | 0.76  | 14 | 42.86 |
| prl_HUKIHOGUJ | 0.46  | 11 | 36.36 |
| prl_HESENUBAT | −1.24 | 7  | 14.29 |
| prl_LYBYBALUV | 0.76  | 10 | 60.00 |
| prl_JATOVYPUW | 0.76  | 8  | 37.50 |
| prl_MAWOMABAB | −1.45 | 13 | 15.38 |
| prl_WELOGYBOZ | 0.73  | 11 | 45.45 |
| prl_PEBAMEFUM | −1.24 | 10 | 40.00 |
| prl_VYDOSAHYG | 0.76  | 7  | 28.57 |
| prl_KEBALIBYN | −0.24 | 8  | 37.50 |
| prl_NIWYPUZAT | −0.54 | 9  | 55.56 |
| prl_TOVOSYVEN | −2.6  | 14 | 14.29 |
| prl_SEKESOJEK | −0.24 | 10 | 50.00 |
| prl_SISEPEBEL | 0.76  | 9  | 66.67 |
| prl_FIWYFYMUB | 1.95  | 16 | 43.75 |
| prl_VUSAZUZES | 0.76  | 8  | 50.00 |
| prl_MEKOLEZYK | −0.15 | 11 | 45.45 |
| prl_VATAJISUP | −1.24 | 13 | 53.85 |
| prl_LAFATYTOM | 0.76  | 11 | 36.36 |

---

---

|               |       |    |        |
|---------------|-------|----|--------|
| prl_BALEBUKEW | −1.18 | 9  | 22.22  |
| prl_LAGIFIFYT | −2.41 | 10 | 50.00  |
| prl_JEMONIGUF | −0.24 | 7  | 57.14  |
| prl_VAHIJIBUH | −1.24 | 8  | 37.50  |
| prl_WUJYLOGEF | −0.06 | 15 | 33.33  |
| prl_HUMUJISYV | 0.73  | 11 | 54.55  |
| prl_DIGAMYKUP | −1.15 | 12 | 75.00  |
| prl_ZABYDUJOF | −0.24 | 17 | 29.41  |
| prl_LEKAHUGIB | −0.54 | 14 | 50.00  |
| prl_MOSONENUT | −0.6  | 10 | 50.00  |
| prl_FIBANEJIT | −0.16 | 8  | 37.50  |
| prl_SEJODOMAG | −2.15 | 8  | 25.00  |
| prl_KIZYMIKUZ | −0.24 | 7  | 100.00 |
| prl_VUKUFOBIB | 0.04  | 9  | 33.33  |
| prl_NEFOFYKAF | −2.15 | 13 | 23.08  |
| prl_KYHILULAB | −0.23 | 11 | 18.18  |
| prl_DOLYTOVUM | 0.73  | 8  | 62.50  |
| prl_LAHOGIMIP | −0.24 | 16 | 50.00  |
| prl_POMISADYJ | −1.26 | 15 | 33.33  |
| prl_TOWOHATIP | 0.74  | 20 | 30.00  |
| prl_LIPUJYVYP | −2.23 | 9  | 44.44  |
| prl_LESOFUSAJ | 0.85  | 14 | 28.57  |
| prl_SUPAJOGAS | 0.76  | 11 | 27.27  |
| prl_NUDEGAFYZ | −2.17 | 25 | 36.00  |
| prl_NYHYKIFIB | −1.23 | 19 | 31.58  |
| prl_PIJAWUWEL | 0.76  | 10 | 30.00  |
| prl_VOWEPUJYJ | 0.76  | 7  | 57.14  |
| prl_SOZASOZYV | −2.24 | 9  | 55.56  |
| prl_HYDEKONYK | 0.76  | 9  | 55.56  |
| prl_KESUGAGAZ | −0.15 | 16 | 25.00  |
| prl_BYTUPIVYN | 0.55  | 16 | 31.25  |
| prl_TUKAVAVUB | 0.76  | 8  | 62.50  |
| prl_GASOWITYN | −2.6  | 10 | 30.00  |
| prl_WYWIFIHOL | −0.26 | 14 | 42.86  |
| prl_GAJAMOMIG | −0.51 | 11 | 54.55  |
| prl_VAJALUKUG | −0.2  | 9  | 66.67  |
| prl_ZEDAKAVOS | −0.24 | 12 | 33.33  |
| prl_SUMUHEDEJ | −1.23 | 12 | 25.00  |
| prl_FODALYJAF | 0.76  | 14 | 57.14  |
| prl_SOMOFYPYG | 0.82  | 12 | 41.67  |
| prl_GOWIKAJOT | 0.79  | 7  | 57.14  |
| prl_DENYNEVYN | −1.15 | 9  | 66.67  |
| prl_GINOZEFYZ | 0.96  | 13 | 30.77  |
| prl_PANIKUPOG | −1.26 | 8  | 25.00  |
| prl_NYDUVEZAM | −0.24 | 13 | 53.85  |
| prl_DEZYDYWIS | −1.23 | 13 | 46.15  |
| prl_MEDUKOLYH | −2.19 | 10 | 50.00  |
| prl_JUJOMUWIK | −1.16 | 8  | 50.00  |
| prl_HISOJELUW | −1.15 | 10 | 30.00  |
| prl_GOGOSYNES | 0.76  | 19 | 26.32  |
| prl_VOSUMIDAG | −2.15 | 11 | 45.45  |

---

---

|                |       |    |       |
|----------------|-------|----|-------|
| prl_ZIHYTUBAP  | 0.73  | 13 | 46.15 |
| prl_PUSIMEWAG  | 0.76  | 13 | 30.77 |
| prl_TALIFEMED  | 0.76  | 9  | 66.67 |
| prl_BANUDAMIW  | -0.24 | 12 | 91.67 |
| prl_BOJEDALYD  | -4.17 | 12 | 16.67 |
| prl_LALAFUJIN  | -1.15 | 12 | 50.00 |
| prl_KOVIHUHYF  | -0.24 | 11 | 18.18 |
| prl_HEDOLOZYG  | -1.24 | 7  | 42.86 |
| prl_FITIVYDAB  | 0.49  | 29 | 34.48 |
| prl_TEGIBUWED  | -1.24 | 8  | 87.50 |
| prl_ZUJEVUZOM  | -1.24 | 12 | 50.00 |
| prl_SUFUWAMAM  | -0.2  | 11 | 27.27 |
| prl_WIVUBYJUV  | -1.24 | 10 | 50.00 |
| prl_GYVOJYMUW  | 0.76  | 12 | 25.00 |
| prl_BADIDUSYF  | -0.27 | 7  | 42.86 |
| prl_GEFUGOSOJ  | 0.76  | 7  | 42.86 |
| prl_FYJYDEFOL  | -1.27 | 8  | 50.00 |
| prl_JYBUVESIJ  | -2.15 | 10 | 50.00 |
| prl_TYSUGANIF  | 1.73  | 14 | 42.86 |
| prl_VUVILYPYN  | -0.11 | 13 | 38.46 |
| prl_DUNITASUM  | -0.27 | 20 | 45.00 |
| prl_VOHYMUPUJ  | -0.18 | 7  | 28.57 |
| prl_JEPYZYTAP  | -0.24 | 15 | 33.33 |
| prl_DOTEKUZOT  | 0.73  | 17 | 58.82 |
| prl_TULOVONYL  | -3.23 | 13 | 23.08 |
| prl_DYTOSATOL  | -0.08 | 10 | 40.00 |
| prl_KYHIJYSAF  | -0.24 | 15 | 26.67 |
| prl_FYNOJOTIP  | -2.24 | 17 | 35.29 |
| prl_NYDADALOM  | 0.76  | 7  | 57.14 |
| prl_BUFEMOGEN  | -0.27 | 8  | 37.50 |
| prl_VUJUZYEDYL | -0.26 | 9  | 44.44 |
| prl_TEGEZAZET  | -0.15 | 7  | 42.86 |
| prl_LONAGAGYM  | -1.16 | 11 | 18.18 |
| prl_ZUTETADUD  | -0.24 | 9  | 44.44 |
| prl_VYVANESYM  | -0.15 | 12 | 16.67 |
| prl_BIBYJEGOT  | -1.24 | 14 | 42.86 |
| prl_TYSONEMAV  | -1.24 | 12 | 41.67 |
| prl_WYFOGUFYS  | -5.23 | 35 | 28.57 |
| prl_JOVEFAVOG  | 0.89  | 12 | 33.33 |
| prl_VUWOKILEB  | -0.15 | 7  | 42.86 |
| prl_FOSEGESUG  | 0.73  | 12 | 50.00 |
| prl_VIWABILOW  | 0.76  | 9  | 66.67 |
| prl_VUGYFOVUS  | 0.76  | 16 | 62.50 |
| prl_BUTABYKEF  | -0.04 | 9  | 33.33 |
| prl_MUZYZYPOG  | -0.08 | 19 | 31.58 |
| prl_GYHAHIDEM  | -2.16 | 13 | 53.85 |
| prl_TYJYZILEM  | -1.24 | 15 | 40.00 |
| prl_WYHYBIFOW  | -0.15 | 10 | 40.00 |
| prl_LUZAHOTOS  | -2.07 | 12 | 16.67 |
| prl_WABILUBEK  | 0.85  | 11 | 45.45 |
| prl_DIPYGOZAP  | 0.76  | 11 | 45.45 |

---

---

|               |       |    |       |
|---------------|-------|----|-------|
| prl_JYKOFEHUB | 0.85  | 14 | 21.43 |
| prl_TIMIFUJUH | -0.24 | 7  | 42.86 |
| prl_FOZUVOZYZ | -1.45 | 11 | 27.27 |
| prl_KOJUWIBOP | 0.76  | 11 | 45.45 |
| prl_ZISYPAFAM | -2.15 | 11 | 45.45 |
| prl_BOTYLIJOB | 0.76  | 8  | 37.50 |
| prl_GUDAPOWAW | 1.76  | 7  | 14.29 |
| prl_VILUZIBOK | -0.26 | 16 | 31.25 |
| prl_PIZYLAMAJ | -0.15 | 16 | 43.75 |
| prl_GODOSODIK | -2.23 | 7  | 28.57 |
| prl_VEVYNEZYW | -2.24 | 13 | 61.54 |
| prl_WIZOWELYM | -1.23 | 7  | 71.43 |
| prl_GEKOPUTUV | 0.96  | 7  | 28.57 |
| prl_FYWYLASAD | -1.53 | 11 | 36.36 |
| prl_PINUVUKEM | -0.2  | 7  | 57.14 |
| prl_DOHENUPAF | -1.04 | 12 | 50.00 |
| prl_TOTIHYBYS | -3.26 | 11 | 27.27 |
| prl_TOGUWAGYS | -1.26 | 11 | 45.45 |
| prl_GESAFETON | -0.15 | 28 | 39.29 |
| prl_DAFENEVYW | -2.45 | 13 | 30.77 |
| prl_ZYSOFOMAZ | -1.24 | 21 | 47.62 |
| prl_LELUNONYV | 0.76  | 9  | 44.44 |
| prl_VUNEFUMAG | 1.76  | 9  | 44.44 |
| prl_KITIGOHYF | -3.06 | 25 | 16.00 |
| prl_TUVUWAFEJ | -3.53 | 13 | 23.08 |
| prl_GIJULIKEF | 0.73  | 12 | 33.33 |
| prl_NYLUHINAT | 0.8   | 13 | 30.77 |
| prl_GIBOGELIN | -2.45 | 8  | 50.00 |
| prl_KYDINEFOV | -0.24 | 12 | 41.67 |
| prl_ZYBAPIPOS | -0.24 | 17 | 35.29 |
| prl_VUBYDASOJ | -0.24 | 14 | 50.00 |
| prl_SADYBELAB | -0.15 | 11 | 45.45 |
| prl_BUNYKYLOP | 0.46  | 9  | 55.56 |
| prl_JEWYLIJOT | -0.2  | 12 | 50.00 |
| prl_KANILASOG | -0.24 | 8  | 37.50 |
| prl_NUJEBULYH | 1.76  | 13 | 30.77 |
| prl_BAWULYDOB | -0.24 | 10 | 40.00 |
| prl_BYMYJEBOV | -2.24 | 10 | 30.00 |
| prl_TOMYDALIK | -1.24 | 8  | 50.00 |
| prl_LYFEFUPOS | -2.23 | 12 | 16.67 |
| prl_JEDUGELAS | -3.23 | 22 | 59.09 |
| prl_ZUWIKAJEN | -0.2  | 20 | 25.00 |
| prl_BEZYKAWYM | 0.76  | 7  | 42.86 |
| prl_GYMOKYFIB | -0.15 | 7  | 42.86 |
| prl_ZUFEKYDIS | -0.24 | 7  | 71.43 |
| prl_GEHIWUNAH | -1.26 | 10 | 30.00 |
| prl_HIZAFOTEB | -0.15 | 11 | 18.18 |
| prl_FEJEZOPIM | -1.16 | 8  | 12.50 |
| prl_TEHEZIMEW | 1.76  | 8  | 25.00 |
| prl_NEVOGUSOB | -0.24 | 7  | 42.86 |
| prl_HIZUDYNAB | -0.15 | 10 | 10.00 |

---

---

|               |       |    |       |
|---------------|-------|----|-------|
| prl_BAHEGYPEW | 1.76  | 10 | 60.00 |
| prl_BOMONYMOP | -1.23 | 20 | 25.00 |
| prl_SOTIZALEW | -0.23 | 11 | 18.18 |
| prl_ZOSYJYJIP | -0.24 | 12 | 33.33 |
| prl_WIHYJEMUL | -0.26 | 12 | 50.00 |
| prl_VEDYGEZOP | -0.2  | 12 | 33.33 |
| prl_SUKAGINAG | -1.24 | 8  | 75.00 |
| prl_BEPONYGOK | -0.12 | 12 | 58.33 |
| prl_MOLYZUHUK | -1.2  | 12 | 50.00 |
| prl_WUGANYVAT | -0.08 | 9  | 44.44 |
| prl_SAMOHYBUN | -1.54 | 8  | 75.00 |
| prl_ZYJALOLAG | 0.76  | 8  | 25.00 |
| prl_VUVEDODET | -1.12 | 9  | 55.56 |
| prl_BITAHAVYM | -0.24 | 14 | 28.57 |
| prl_SAKAJISOJ | -1.15 | 13 | 69.23 |
| prl_DAWELYTIT | -1.24 | 11 | 36.36 |
| prl_GYHAGYJAK | -1.26 | 14 | 35.71 |
| prl_KYHEVUGYH | -1.24 | 9  | 44.44 |
| prl_VONUTAHOB | 0.76  | 11 | 54.55 |
| prl_FOLUBISUN | 0.93  | 10 | 50.00 |
| prl_ZULELAJID | -3.16 | 16 | 31.25 |
| prl_WUPIVAVIG | 1.89  | 18 | 33.33 |
| prl_NOFASOLAH | -0.23 | 14 | 28.57 |
| prl_ZEJYJOVIK | 0.76  | 12 | 41.67 |
| prl_LUGIKYFUJ | 0.85  | 18 | 38.89 |
| prl_KYMIFUVAG | -1.11 | 32 | 40.63 |
| prl_TAVYBUHYJ | 0.76  | 13 | 61.54 |
| prl_NEKUPOLOH | -1.14 | 24 | 20.83 |
| prl_WABILOFUN | -0.27 | 9  | 22.22 |
| prl_LYNIHIKOF | -2.15 | 20 | 25.00 |
| prl_WYVOFIWEH | 1.76  | 11 | 27.27 |
| prl_TYTAMOJEL | -0.15 | 7  | 57.14 |
| prl_WAZOBYJYB | -1.24 | 13 | 30.77 |
| prl_FUVOMOFAG | -0.04 | 10 | 50.00 |
| prl_HAWIFIVIN | -1.15 | 11 | 54.55 |
| prl_MYZESIMIK | 0.76  | 11 | 36.36 |
| prl_FUHEJOSIF | -2.14 | 20 | 15.00 |
| prl_MEPIMOLOM | -0.24 | 15 | 40.00 |
| prl_KILYLYBYJ | -4.15 | 18 | 27.78 |
| prl_NIWISOWEK | -2.23 | 12 | 50.00 |
| prl_TUMIDAKOM | 0.4   | 8  | 12.50 |
| prl_MOKUVUBUW | -3.19 | 14 | 57.14 |
| prl_BEWOHOMYS | 0.96  | 13 | 38.46 |
| prl_JATUSANUS | -3.15 | 18 | 38.89 |
| prl_PEZAGEDIP | -1.26 | 18 | 33.33 |
| prl_LIHYZUPAT | 0.76  | 12 | 41.67 |
| prl_MUZAMOMAB | -1.24 | 7  | 57.14 |
| prl_DUGYBYFEV | -0.24 | 11 | 54.55 |
| prl_VIKAGAPYL | 0.96  | 7  | 71.43 |
| prl_MISUPYNYD | -1.24 | 7  | 57.14 |
| prl_JOZUPYMIP | 0.76  | 18 | 38.89 |

---

---

|               |       |    |       |
|---------------|-------|----|-------|
| prl_BITUMIBAS | 1.79  | 15 | 20.00 |
| prl_BOGINENIL | −0.54 | 13 | 53.85 |
| prl_NETEJASUT | 0.46  | 16 | 37.50 |
| prl_PAZAFYFOG | −2.53 | 9  | 22.22 |
| prl_FUNYZUBET | 1.79  | 8  | 50.00 |
| prl_NEKYKYPOF | −2.16 | 14 | 35.71 |
| prl_TYSAHAHEL | −0.27 | 10 | 60.00 |
| prl_NUKULIVAZ | −0.15 | 15 | 53.33 |
| prl_NYMEBONOF | −1.24 | 7  | 42.86 |
| prl_NYSYVELYZ | −0.15 | 13 | 30.77 |
| prl_KOTOZEKIT | −1.24 | 9  | 66.67 |
| prl_BIDILUVYH | −0.06 | 10 | 20.00 |
| prl_JYVYPIPN  | −0.24 | 11 | 27.27 |
| prl_LULOWOFYN | −2.15 | 12 | 58.33 |
| prl_SIVAGYGIZ | −0.15 | 14 | 64.29 |
| prl_TILUFYDEM | −0.15 | 23 | 21.74 |
| prl_GEFIJIPYB | −1.24 | 7  | 42.86 |
| prl_ZIPINIDOL | −0.15 | 8  | 50.00 |
| prl_HUTOJOWUV | −1.23 | 12 | 41.67 |
| prl_DUBATUWIT | −2.15 | 13 | 69.23 |
| prl_KAZEDUKUF | −1.14 | 25 | 20.00 |
| prl_DOVOPIZYD | −3.15 | 19 | 15.79 |
| prl_HUBIDEPEZ | −1.15 | 18 | 22.22 |
| prl_SYFUVVOVB | 0.4   | 14 | 14.29 |
| prl_ZYFEGOHYJ | −1.16 | 8  | 50.00 |
| prl_KADUGUFYB | 1.76  | 12 | 50.00 |
| prl_NOMOSIBOW | 0.96  | 15 | 40.00 |
| prl_TYLYHESIF | 0.76  | 15 | 20.00 |
| prl_PISOZEPYW | −0.2  | 12 | 58.33 |
| prl_LAVALILYD | −3.15 | 14 | 35.71 |
| prl_DOGIHADUT | −1.04 | 7  | 57.14 |
| prl_GALENEMOG | 0.96  | 15 | 40.00 |
| prl_JYBAKUPOZ | −0.54 | 10 | 40.00 |
| prl_PAWIJIZIN | 1.79  | 16 | 18.75 |
| prl_TIVUNYSIF | 0.79  | 8  | 62.50 |
| prl_GEBOSAGAS | −3.53 | 15 | 20.00 |
| prl_BUJAKONYZ | −2.06 | 9  | 11.11 |
| prl_PEPAFAMUK | −3.15 | 15 | 26.67 |
| prl_TYGOHOPIJ | −1.23 | 10 | 50.00 |
| prl_DIHIGUVAV | −1.24 | 8  | 50.00 |
| prl_LEBITAVUW | −1.24 | 9  | 22.22 |
| prl_DEWUHYPEF | −4.23 | 19 | 21.05 |
| prl_DATEDYJIK | −2.24 | 8  | 37.50 |
| prl_PIWESAGUD | −0.24 | 9  | 33.33 |
| prl_GINASAMUP | −1.24 | 12 | 25.00 |
| prl_WAHADUJYV | −1.2  | 8  | 50.00 |
| prl_JUFINOSUZ | −0.15 | 9  | 22.22 |
| prl_SENOVUVEW | 0.76  | 7  | 57.14 |
| prl_FODAPEPEB | −1.24 | 9  | 77.78 |
| prl_MITAWAGAL | −0.12 | 7  | 42.86 |
| prl_HYKAVUPUP | −1.24 | 11 | 45.45 |

---

---

|                |       |    |       |
|----------------|-------|----|-------|
| prl_SIFYMOBAT  | -1.2  | 9  | 55.56 |
| prl_MESIBONYS  | 0.85  | 16 | 37.50 |
| prl_BULUZYGYV  | 0.96  | 11 | 27.27 |
| prl_TASAPEVYK  | -1.2  | 9  | 22.22 |
| prl_HAZUZUHUN  | -0.24 | 11 | 36.36 |
| prl_PUSOZAPEB  | 0.76  | 10 | 30.00 |
| prl_TIKOTAWEV  | -0.6  | 13 | 15.38 |
| prl_PEGADEMUEH | 0.82  | 10 | 30.00 |
| prl_KISYSINUL  | -0.15 | 11 | 54.55 |
| prl_FEVALUFYS  | -2.26 | 15 | 53.33 |
| prl_WATYNIGEZ  | 0.76  | 10 | 40.00 |
| prl_SUFUVANAT  | -1.24 | 17 | 52.94 |
| prl_LUZIVUVEL  | -1.16 | 7  | 42.86 |
| prl_BENUHESAN  | -1.15 | 18 | 16.67 |
| prl_PUSAGEPEP  | -0.26 | 12 | 25.00 |
| prl_DENIKYDEZ  | -2.23 | 19 | 63.16 |
| prl_NEKIVAVEK  | 2.76  | 13 | 38.46 |
| prl_HYLEFONAD  | -0.24 | 10 | 20.00 |
| prl_DUBONEWUG  | -2.24 | 20 | 40.00 |
| prl_NUBIDEGEL  | -1.6  | 7  | 42.86 |
| prl_BINUTENUG  | -2.24 | 7  | 28.57 |
| prl_SEJIBAKYN  | -0.16 | 9  | 44.44 |
| prl_PITEBOHAN  | 0.76  | 11 | 54.55 |
| prl_VODYFEBAS  | -0.26 | 18 | 44.44 |
| prl_VYSYDUFES  | 0.8   | 14 | 50.00 |
| prl_GIMULIVAG  | -2.24 | 13 | 30.77 |
| prl_LAJOTIJUN  | -0.45 | 14 | 85.71 |
| prl_NUGOMOZUF  | 0.85  | 11 | 27.27 |
| prl_PEPUZUJOV  | -1.23 | 12 | 16.67 |
| prl_JOGYPOVEB  | -3.26 | 15 | 60.00 |
| prl_WUPEMYJYW  | -2.2  | 16 | 25.00 |
| prl_HELATEDIK  | -0.2  | 9  | 44.44 |
| prl_GEZIZULUN  | -1.15 | 10 | 40.00 |
| prl_BONIJYJOZ  | -0.15 | 11 | 45.45 |
| prl_TONULIGYT  | -3.23 | 24 | 62.50 |
| prl_KADODYPUS  | 0.76  | 7  | 57.14 |
| prl_MOLALAPYZ  | -0.24 | 13 | 38.46 |
| prl_PILIMADIK  | 0.76  | 18 | 22.22 |
| prl_BASUKYHIW  | -1.54 | 9  | 66.67 |
| prl_PETAMOHYF  | -0.16 | 10 | 40.00 |
| prl_VESAJAMOT  | -1.15 | 12 | 50.00 |
| prl_KAHEGUNEH  | 0.76  | 7  | 57.14 |
| prl_TEWEDAJOS  | 0.76  | 13 | 46.15 |
| prl_FYZOFUBOM  | -1.15 | 12 | 41.67 |
| prl_VOBUVYDAB  | -2.24 | 7  | 42.86 |
| prl_VUDIHUTIZ  | 0.79  | 11 | 18.18 |
| prl_KYNEPILYF  | -0.54 | 13 | 46.15 |
| prl_JYVUGIBUM  | -0.15 | 16 | 31.25 |
| prl_MIPIJIDYL  | -0.52 | 9  | 44.44 |
| prl_DAKYFAVUF  | -2.23 | 10 | 30.00 |
| prl_DYSOHUBAF  | 1.76  | 18 | 38.89 |

---

---

|                |       |    |       |
|----------------|-------|----|-------|
| prl_JIDOLUHOB  | −1.26 | 9  | 55.56 |
| prl_FIWINIFED  | −0.2  | 7  | 71.43 |
| prl_JUZIWIGOP  | −0.24 | 10 | 50.00 |
| prl_SAZUTEPOJ  | −1.24 | 11 | 45.45 |
| prl_NILED AJEP | 0.73  | 18 | 50.00 |
| prl_VASYN YWAZ | 1.73  | 9  | 55.56 |
| prl_VUGEGAD YZ | 0.79  | 12 | 91.67 |
| prl_BIFONYHEZ  | −2.23 | 15 | 73.33 |
| prl_HOSIKYLON  | 2.76  | 13 | 46.15 |
| prl_TIMENATAL  | −0.2  | 7  | 14.29 |
| prl_GUNOBEPAN  | 0.93  | 7  | 28.57 |
| prl_TEKIMILIP  | −0.15 | 16 | 50.00 |
| prl_BYKEWEPYF  | −2.23 | 13 | 23.08 |
| prl_KUPUJOHUM  | 0.76  | 9  | 44.44 |
| prl_BEPISIGOV  | 0.76  | 12 | 25.00 |
| prl_PAKAKIHEF  | −2.15 | 11 | 54.55 |
| prl_WYZUMATUD  | 0.76  | 12 | 25.00 |
| prl_WOLOKOTET  | −1.24 | 10 | 50.00 |
| prl_ZUSUKYBUH  | −1.26 | 8  | 62.50 |
| prl_HYZYHADAD  | 0.76  | 12 | 33.33 |
| prl_ZONYBENYD  | 0.76  | 11 | 81.82 |
| prl_BESYLUZIV  | −2.23 | 8  | 12.50 |
| prl_SEKYKEVYL  | −1.5  | 11 | 45.45 |
| prl_MEJIFUBAG  | −1.24 | 8  | 50.00 |
| prl_LYDYKEVEG  | −1.24 | 10 | 50.00 |
| prl_FOKEPULUD  | 0.76  | 14 | 35.71 |
| prl_FUBETYHUT  | −0.15 | 11 | 27.27 |
| prl_PAWYNOSAZ  | −2.08 | 11 | 18.18 |
| prl_KAHYKESIF  | 0.96  | 12 | 50.00 |
| prl_VYGAHITYW  | −1.26 | 8  | 37.50 |
| prl_PAJYJYJUL  | −0.15 | 22 | 18.18 |
| prl_HADIZYWOH  | 0.76  | 16 | 25.00 |
| prl_KAGIPAGED  | −1.5  | 15 | 66.67 |
| prl_KUNUWUJEG  | −0.24 | 13 | 15.38 |
| prl_MOPETANAL  | 1.8   | 22 | 18.18 |
| prl_FYNATYZIS  | −3.23 | 16 | 43.75 |
| prl_FYPANOBIN  | −3.53 | 17 | 29.41 |
| prl_WITYWEZOJ  | −0.15 | 17 | 17.65 |
| prl_FUPAPESYW  | −0.18 | 11 | 27.27 |
| prl_JABYTYVOF  | −0.24 | 7  | 14.29 |
| prl_NEZOZUBYS  | −0.24 | 11 | 36.36 |
| prl_DUHANETAH  | 0.76  | 7  | 28.57 |
| prl_PEVIBADYV  | −0.24 | 9  | 44.44 |
| prl_DAHUHI SOV | 0.45  | 30 | 33.33 |
| prl_SOKETAJAT  | 0.76  | 15 | 46.67 |
| prl_GUBEKEKUH  | −0.24 | 8  | 37.50 |
| prl_BOBUSYTUH  | −0.54 | 9  | 44.44 |
| prl_LUGOPIFYF  | −0.24 | 10 | 50.00 |
| prl_VYGIDOZUF  | −1.24 | 11 | 18.18 |
| prl_WISITEVYM  | 1.76  | 7  | 42.86 |
| prl_FEKUWYDEW  | 1.76  | 9  | 55.56 |

---



---

|               |       |    |       |
|---------------|-------|----|-------|
| prl_VESYDAKOL | −0.16 | 12 | 33.33 |
| prl_VABYJYTUH | −0.45 | 11 | 36.36 |
| prl_NEKIBOGAM | 0.73  | 11 | 63.64 |
| prl_KYDABUBUK | −0.23 | 14 | 21.43 |
| prl_ZYBEWYTOK | −0.6  | 8  | 50.00 |
| prl_PEGYHINEZ | 0.76  | 12 | 41.67 |
| prl_HEGYBOSEG | 0.76  | 7  | 57.14 |
| prl_MIMEBETAM | −0.24 | 9  | 55.56 |
| prl_DIPANEPUB | −0.5  | 10 | 20.00 |
| prl_NELUSOBH  | 0.46  | 14 | 57.14 |
| prl_PEJUVANAS | −0.24 | 11 | 72.73 |
| prl_LOWYHIHYZ | −0.24 | 9  | 55.56 |
| prl_WINAHANIF | −0.24 | 16 | 43.75 |
| prl_LABUSYSOM | 1.76  | 11 | 45.45 |
| prl_WIFIHEBOT | −0.15 | 7  | 42.86 |
| prl_JIKANUNYB | 0.76  | 8  | 37.50 |
| prl_NYLEWOZUN | 1.76  | 13 | 46.15 |
| prl_JESEPEASZ | −1.24 | 13 | 46.15 |
| prl_DUWASAVYN | −0.51 | 7  | 14.29 |
| prl_NYLYGELUT | −2.24 | 8  | 12.50 |
| prl_FUKUMUFYW | 0.76  | 9  | 55.56 |
| prl_FABIJYDUT | −2.23 | 15 | 60.00 |
| prl_FYLILINUP | −2.54 | 17 | 35.29 |
| prl_VUNYZOMYF | 0.46  | 11 | 27.27 |
| prl_HYDEWYPUW | −3.11 | 13 | 46.15 |
| prl_JALAGUKUL | −0.24 | 7  | 57.14 |
| prl_VOVUVELIF | −0.24 | 10 | 30.00 |
| prl_TUFANAKOD | −1.24 | 8  | 25.00 |
| prl_BUBIWUFAP | 0.76  | 12 | 58.33 |
| prl_PAHAHUSEK | 0.4   | 7  | 14.29 |
| prl_SEMYTEMAF | −0.18 | 9  | 55.56 |
| prl_JYFIBANES | −1.23 | 16 | 25.00 |
| prl_MONODESOK | 0.76  | 10 | 40.00 |
| prl_TOLADEFOK | −0.16 | 8  | 50.00 |
| prl_KINYKIWOJ | −0.26 | 16 | 31.25 |
| prl_TISYMIZOK | −0.21 | 8  | 25.00 |
| prl_FUFAFIDAP | −0.24 | 8  | 37.50 |
| prl_SIGEDOMAP | −2.45 | 12 | 33.33 |
| prl_BUGALYSUV | 1.4   | 11 | 27.27 |
| prl_BIHEHUDOH | 0.76  | 13 | 46.15 |
| prl_SIHKEVUM  | 0.76  | 9  | 66.67 |
| prl_LAKYZIFAV | −0.24 | 10 | 10.00 |
| prl_ZOGYKUZUJ | −0.24 | 12 | 50.00 |
| prl_HEZOMIKEL | −0.24 | 8  | 37.50 |
| prl_BINONENIW | 0.85  | 15 | 33.33 |
| prl_KYNYKYHES | 0.76  | 8  | 50.00 |
| prl_MYGASEJEJ | −1.5  | 9  | 55.56 |
| prl_DYPUSUZEL | −0.24 | 8  | 25.00 |
| prl_NELATEGOL | −3.53 | 15 | 40.00 |
| prl_JYJOGEMIT | 1.05  | 14 | 35.71 |
| prl_KYSEDOMAT | 0.85  | 14 | 57.14 |

---

---

|               |       |    |       |
|---------------|-------|----|-------|
| prl_WAHIMAFEH | -1.15 | 20 | 20.00 |
| prl_GIVYDUDUG | -1.53 | 9  | 44.44 |
| prl_GATITOMYL | -0.24 | 13 | 53.85 |
| prl_WAKEJOFEG | -1.17 | 11 | 72.73 |
| prl_BOMUSISED | -0.15 | 9  | 33.33 |
| prl_TOVOBYTUG | -1.15 | 10 | 50.00 |
| prl_FYVUHOBZ  | -0.18 | 18 | 50.00 |
| prl_VYNUWUZYM | 0.96  | 17 | 41.18 |
| prl_WODASIVOZ | -0.51 | 9  | 22.22 |
| prl_SEPEDEWEK | 0.76  | 7  | 28.57 |
| prl_DUSIBEBUH | 0.76  | 12 | 66.67 |
| prl_LYZOKIFEZ | -0.27 | 10 | 40.00 |
| prl_FAMOFENIV | -3.15 | 18 | 16.67 |
| prl_WONILOPEM | -0.24 | 8  | 50.00 |
| prl_LIMUNUZUM | -1.26 | 8  | 50.00 |
| prl_PUVAPELYG | -4.15 | 13 | 23.08 |
| prl_WYPEZAZYB | -1.24 | 14 | 35.71 |
| prl_LINEKOBOM | -0.27 | 8  | 75.00 |
| prl BUMUFYZOL | 0.96  | 17 | 41.18 |
| prl_TEHITUWEZ | -3.15 | 17 | 35.29 |
| prl_JYBYDUBUP | -0.24 | 11 | 18.18 |
| prl_GYMYDIKOZ | 0.76  | 7  | 85.71 |
| prl_FEJOVIHEF | -0.27 | 7  | 28.57 |
| prl_ZAJIGOWAG | -1.54 | 13 | 53.85 |
| prl_NOGABOVIZ | -0.24 | 7  | 28.57 |
| prl_MIJAGOKYF | -0.54 | 7  | 42.86 |
| prl_FOMUGOFIS | 0.85  | 11 | 63.64 |
| prl_LINODYWAL | 0.55  | 16 | 31.25 |
| prl_WUHEFIDIM | -0.24 | 11 | 54.55 |
| prl_FAJISYFAJ | -0.24 | 13 | 38.46 |
| prl_BILAJIHYP | -0.24 | 13 | 53.85 |
| prl_HYNADUMON | 0.96  | 17 | 47.06 |
| prl_MOKOWOTIF | -0.15 | 7  | 71.43 |
| prl_WAJIBYLIH | -1.04 | 9  | 11.11 |
| prl_LEJABUFYN | -0.54 | 10 | 60.00 |
| prl_SEBOWUKED | 1.76  | 9  | 33.33 |
| prl_VUDEHAGOS | -2.44 | 17 | 47.06 |
| prl_WYKUHAGIM | -1.54 | 8  | 62.50 |
| prl_BOKALIYH  | 0.79  | 16 | 31.25 |
| prl_VIBUMETOM | -0.24 | 8  | 50.00 |
| prl_KIFYMIHOH | -0.54 | 9  | 55.56 |
| prl_WOKISEBOM | -2.26 | 18 | 61.11 |
| prl_BOTAGIDUZ | -0.07 | 8  | 50.00 |
| prl_GOGEBUHIZ | 0.73  | 7  | 71.43 |
| prl_FAGOPYTEW | -1.45 | 16 | 37.50 |
| prl_DUFEJIDUB | 0.76  | 7  | 28.57 |
| prl_GAMAPYNIS | -0.15 | 9  | 44.44 |
| prl_DYPABYDIW | -0.2  | 7  | 14.29 |
| prl_TEMYHAMUF | -2.23 | 10 | 40.00 |
| prl_BAZOVEPIN | -1.5  | 9  | 44.44 |
| prl_LAWYHIVIJ | -0.5  | 7  | 57.14 |

---

---

|                |       |    |       |
|----------------|-------|----|-------|
| prl_FODIMAZAN  | −0.16 | 9  | 33.33 |
| prl_GEGENOHEH  | −1.6  | 13 | 69.23 |
| prl_SITIZUPIH  | 1.73  | 10 | 50.00 |
| prl_WAHEKYHUM  | −0.24 | 10 | 30.00 |
| prl_BEHUNESAZ  | −1.08 | 13 | 15.38 |
| prl_GIBYNADOM  | −3.23 | 23 | 65.22 |
| prl_WAHISAJIW  | −0.25 | 7  | 57.14 |
| prl_LEHUTOSAF  | 0.76  | 8  | 50.00 |
| prl_DINEPOZEN  | 0.76  | 14 | 35.71 |
| prl_SUDALAFOK  | −0.12 | 8  | 50.00 |
| prl_LUDABYMYL  | −1.2  | 9  | 55.56 |
| prl_GOWOWOFUL  | −4.53 | 15 | 26.67 |
| prl_HEGYVOKOZ  | −0.12 | 12 | 58.33 |
| prl_KIPOHOHIB  | −1.16 | 12 | 16.67 |
| prl_ZISOKIZOH  | −0.24 | 9  | 33.33 |
| prl_JIGIZUZIP  | 0.76  | 8  | 12.50 |
| prl_VAKIBAMYB  | 0.5   | 8  | 50.00 |
| prl_TYVIHOZOP  | −1.24 | 27 | 22.22 |
| prl_PAKEGUPEZ  | −0.6  | 8  | 62.50 |
| prl_NIKYJULUF  | −3.23 | 11 | 27.27 |
| prl_NEBOHYDEW  | −0.24 | 7  | 28.57 |
| prl_PELUKUNYM  | −3.14 | 24 | 16.67 |
| prl_MEMAVYBOP  | 0.49  | 7  | 57.14 |
| prl_ZUDIPELUB  | −0.15 | 7  | 42.86 |
| prl_VISEFYKUK  | −0.15 | 13 | 53.85 |
| prl_WEJUNEDIL  | −1.15 | 16 | 56.25 |
| prl_WAZAWOHIG  | 0.85  | 12 | 16.67 |
| prl_BUKUPOBUH  | −0.15 | 8  | 50.00 |
| prl_WAMUDUJAG  | −0.54 | 8  | 50.00 |
| prl_GAKYSASYL  | −0.15 | 16 | 50.00 |
| prl_DUTABOZEM  | −1.24 | 14 | 50.00 |
| prl_BASIGAGAW  | −0.24 | 13 | 61.54 |
| prl_ZIFOKUVYJ  | −1.24 | 12 | 16.67 |
| prl_LOKUBUNEH  | −0.26 | 7  | 71.43 |
| prl_PUHUPUZYIN | −0.2  | 13 | 46.15 |
| prl_VIZUFUGAZ  | −0.21 | 7  | 42.86 |
| prl_KESILYTEL  | −1.95 | 18 | 61.11 |
| prl_DUMYBAFOP  | −1.15 | 10 | 30.00 |
| prl_JYNYMOZYD  | −0.24 | 8  | 37.50 |
| prl_DETOMEZOZ  | 0.76  | 14 | 57.14 |
| prl_LOLIPUJUP  | 1.74  | 18 | 44.44 |
| prl_MUHINOVIIH | 0.76  | 7  | 28.57 |
| prl_SYSOGYDUS  | −0.21 | 9  | 22.22 |
| prl_PALETUSYD  | −0.54 | 9  | 44.44 |
| prl_BATEVAHIJ  | 1.76  | 8  | 25.00 |
| prl_HIPEGILUS  | 0.76  | 13 | 30.77 |
| prl_TISEPOBAS  | −1.24 | 12 | 16.67 |
| prl_LYZYJYPOM  | 0.73  | 14 | 42.86 |
| prl_BYFINAHUH  | −1.15 | 17 | 23.53 |
| prl_DOHENUMEH  | −0.24 | 8  | 62.50 |
| prl_HEDATAVOK  | −1.15 | 21 | 19.05 |

---

---

|                |       |    |       |
|----------------|-------|----|-------|
| prl_DIFIMYPYB  | −0.15 | 13 | 53.85 |
| prl_BUBYBUZYV  | −0.15 | 15 | 53.33 |
| prl_DOFYHYMAB  | −0.45 | 9  | 44.44 |
| prl_KIKYFATOB  | −1.24 | 13 | 38.46 |
| prl_HUBILYHIF  | 0.05  | 7  | 28.57 |
| prl_NOZEVESAD  | 0.76  | 14 | 57.14 |
| prl_WYTUHEHOB  | 0.8   | 12 | 58.33 |
| prl_DASOHIVOS  | −1.15 | 13 | 76.92 |
| prl_WUVOTAGYK  | −3.16 | 8  | 25.00 |
| prl_MASUPUHUG  | −3.16 | 20 | 25.00 |
| prl_KONEMUJYM  | −0.54 | 10 | 40.00 |
| prl_BAMEVESEP  | −0.24 | 8  | 87.50 |
| prl_KIBEWOB OG | −1.15 | 21 | 19.05 |
| prl_LITOWEDIM  | −2.24 | 9  | 33.33 |
| prl_JAZUHAKYW  | −1.24 | 12 | 33.33 |
| prl_BIBEDYGUZ  | −1.24 | 8  | 37.50 |
| prl_NEFOHETEH  | −2.26 | 12 | 50.00 |
| prl_MENEFYFON  | −3.53 | 12 | 33.33 |
| prl_DYMUGYFAW  | −1.12 | 20 | 35.00 |
| prl_KYZYBEZOK  | −2.04 | 7  | 42.86 |
| prl_ZITOTEGIS  | −0.15 | 8  | 75.00 |
| prl_GAJYDOSAB  | −0.18 | 20 | 50.00 |
| prl_DASUMYVEW  | −0.15 | 20 | 20.00 |
| prl_GEMAJYZAN  | 0.4   | 8  | 62.50 |
| prl_VONUFOZUH  | −1.15 | 12 | 75.00 |
| prl_MIPIMIMIV  | −1.24 | 13 | 76.92 |
| prl_WOLAMYLOL  | 0.76  | 9  | 22.22 |
| prl_SATEMIJEF  | −0.15 | 12 | 58.33 |
| prl_BEZINYLUH  | 0.85  | 8  | 50.00 |
| prl_MYKALOJEJ  | −0.15 | 17 | 41.18 |
| prl_VAVAZOFOW  | 0.96  | 9  | 22.22 |
| prl_TEMAVASEM  | −2.23 | 11 | 45.45 |
| prl_LUBYKAKIM  | −0.04 | 9  | 22.22 |
| prl_KAKATYVEW  | −2.23 | 8  | 37.50 |
| prl_HELUWUZUV  | −1.04 | 8  | 50.00 |
| prl_KULOHOPIN  | −1.54 | 9  | 33.33 |
| prl_PIBAPUJIV  | −0.15 | 11 | 45.45 |
| prl_ZATYMODYB  | −3.23 | 22 | 27.27 |
| prl_ZUBODOLED  | −2.94 | 10 | 20.00 |
| prl_FEGOMOTYS  | 0.76  | 19 | 42.11 |
| prl_GUBETOPEB  | −2.24 | 10 | 50.00 |
| prl_SIHUHOHEN  | 0.55  | 13 | 23.08 |
| prl_FUZYKUKKEF | −0.6  | 8  | 75.00 |
| prl_MEDYGUSUT  | −1.5  | 7  | 57.14 |
| prl_SALOTEZYD  | −2.44 | 17 | 35.29 |
| prl_WEZINUDIT  | −1.26 | 12 | 41.67 |
| prl_ZOBYGIMAJ  | −0.54 | 11 | 36.36 |
| prl_LUFIZOZAB  | 0.85  | 8  | 75.00 |
| prl_NEPOVIWUV  | −1.24 | 9  | 55.56 |
| prl_BYLULEVAW  | −0.08 | 12 | 33.33 |
| prl_ZINUZOKAJ  | 0.8   | 12 | 50.00 |

---

---

|                |       |    |       |
|----------------|-------|----|-------|
| prl_NENUJEDUJ  | −0.21 | 7  | 42.86 |
| prl_NYFEHUZOP  | 0.8   | 19 | 15.79 |
| prl_DYGOBOWOG  | −0.15 | 12 | 50.00 |
| prl_MEDIJOWAG  | −0.24 | 10 | 40.00 |
| prl_HEBYFETON  | −2.24 | 11 | 27.27 |
| prl_TAZYVYKUN  | 0.76  | 10 | 40.00 |
| prl_FYKEKAPOG  | −0.15 | 11 | 54.55 |
| prl_PEDIBONUZ  | −0.24 | 11 | 27.27 |
| prl_DYDAGAHOH  | −0.24 | 12 | 25.00 |
| prl_SIGIVUTON  | −0.24 | 8  | 75.00 |
| prl_TOKAKUKAT  | −1.16 | 14 | 35.71 |
| prl_SUFANUTUS  | 0.76  | 12 | 50.00 |
| prl_KIKIWONIG  | −0.24 | 19 | 31.58 |
| prl_ZYDUMINIF  | −0.04 | 9  | 33.33 |
| prl_PENOTAJAP  | 0.76  | 11 | 18.18 |
| prl_JEDISOHUG  | −1.24 | 15 | 53.33 |
| prl_JOFOVEBIV  | 0.76  | 21 | 42.86 |
| prl_DYTYBEGYM  | 0.88  | 12 | 33.33 |
| prl_JOFAPODED  | −1.24 | 11 | 45.45 |
| prl_KEZETEOB   | −0.24 | 15 | 53.33 |
| prl_ZALUHYLOF  | −0.24 | 12 | 25.00 |
| prl_LABUHEMOK  | 0.73  | 8  | 75.00 |
| prl_HYHIKEHON  | −0.24 | 7  | 14.29 |
| prl_KUGYLYFEW  | −0.45 | 11 | 45.45 |
| prl_HAHOHODAD  | 0.76  | 9  | 66.67 |
| prl_KALUPOWOV  | −2.16 | 13 | 38.46 |
| prl_DUPATUZES  | −1.23 | 10 | 50.00 |
| prl_FAMOKOGUD  | −0.24 | 11 | 36.36 |
| prl_KYMILATAZ  | −1.23 | 7  | 28.57 |
| prl_TYJAPELAS  | −1.15 | 13 | 30.77 |
| prl_DOSYVEPUM  | 0.76  | 14 | 50.00 |
| prl_FOHIVIVYW  | −0.24 | 7  | 14.29 |
| prl_HIWUMUSAK  | −0.24 | 15 | 46.67 |
| prl_HYNYSUMYS  | −0.24 | 8  | 37.50 |
| prl_ZOVEPOVAT  | −0.54 | 10 | 10.00 |
| prl_HUNINEZUK  | −0.15 | 12 | 41.67 |
| prl_MIWEKUVUS  | 0.76  | 12 | 16.67 |
| prl_BOSYVEWAN  | −0.16 | 11 | 36.36 |
| prl_VENUPYFUH  | −0.18 | 9  | 55.56 |
| prl_MUWEDOCHAN | −1.16 | 10 | 50.00 |
| prl_TUGUJOTAK  | −0.15 | 10 | 20.00 |
| prl_WAMIPUDYL  | −0.24 | 19 | 21.05 |
| prl_FYTOJEHAK  | −1.5  | 14 | 42.86 |
| prl_PUJYMAFOL  | −0.23 | 15 | 46.67 |
| prl_ZIHITWED   | −0.15 | 15 | 46.67 |
| prl_HISEPUSEF  | −2.23 | 13 | 61.54 |
| prl_GONEDOPOV  | −0.24 | 10 | 30.00 |
| prl_HISIJOJYW  | −1.23 | 10 | 20.00 |
| prl_PYWIBUJUZ  | 0.85  | 17 | 23.53 |
| prl_ZOWIZIZAP  | −2.15 | 8  | 37.50 |
| prl_KIKEDEBYV  | −0.26 | 12 | 66.67 |

---

---

|               |       |    |       |
|---------------|-------|----|-------|
| prl_SOTEPUTET | 0.79  | 16 | 31.25 |
| prl_BAVEDALUH | -0.24 | 12 | 41.67 |
| prl_PIDUFYMUH | -0.26 | 12 | 25.00 |
| prl_FULIBOTID | -1.24 | 9  | 66.67 |
| prl_FISUWYLYN | -2.45 | 19 | 47.37 |
| prl_BYWIHEJEP | -1.23 | 11 | 18.18 |
| prl_JUMIMEMEN | -1.15 | 13 | 15.38 |
| prl_PAMUHUGYL | -3.53 | 17 | 47.06 |
| prl_VOHILASOV | -1.15 | 14 | 28.57 |
| prl_KYFEPOVIL | -2.15 | 17 | 23.53 |
| prl_SANAVONID | -2.11 | 12 | 66.67 |
| prl_MYGOTAFIV | -0.24 | 10 | 30.00 |
| prl_KUGOHYWIF | -0.24 | 16 | 31.25 |
| prl_TYHAWAFAP | -1.15 | 12 | 25.00 |
| prl_NAJEHUZEK | -0.24 | 8  | 25.00 |
| prl_WYFOPIJAP | -3.26 | 11 | 18.18 |
| prl_DYVADYDYJ | -0.25 | 12 | 58.33 |
| prl_LOKEWEPIG | -2.14 | 8  | 37.50 |
| prl_SUBIKAPET | 0.76  | 14 | 50.00 |
| prl_FIWYSIWAS | -0.15 | 12 | 41.67 |
| prl_JYHITONUF | -2.15 | 8  | 37.50 |
| prl_MEZUHUDYD | -0.26 | 11 | 63.64 |
| prl_SIWEFUMID | -3.25 | 15 | 33.33 |
| prl_TAZEGABOG | -0.24 | 7  | 28.57 |
| prl_KADUFYKEF | -2.15 | 10 | 20.00 |
| prl_DILESOGIL | -1.26 | 18 | 44.44 |
| prl_GEJYNENYV | -1.15 | 9  | 44.44 |
| prl_JEZOMUFOV | -2.04 | 9  | 66.67 |
| prl_SEFOJYTAF | 0.4   | 10 | 30.00 |
| prl_PADELAMOB | 0.76  | 7  | 28.57 |
| prl_LUKOWYFON | -1.24 | 9  | 22.22 |
| prl_WYDAPIZYN | -0.24 | 7  | 42.86 |
| prl_JOGOVUTUH | -1.2  | 7  | 57.14 |
| prl_PEPUVAMUD | 0.04  | 9  | 33.33 |
| prl_KUHIKYFYB | -0.26 | 10 | 40.00 |
| prl_SUTOTIFAS | -2.24 | 18 | 16.67 |
| prl_JUFOTENIK | 0.4   | 7  | 28.57 |
| prl_FIKAMINUD | -2.16 | 16 | 25.00 |
| prl_ZIGUKEJYJ | 0.85  | 14 | 21.43 |
| prl_TEJEFEMUW | 0.5   | 7  | 42.86 |
| prl_TASANUTOL | -1.5  | 13 | 7.69  |
| prl_JIKELEWUP | -0.24 | 15 | 53.33 |
| prl_GENYGUJAG | 0.4   | 8  | 12.50 |
| prl_DEKYHUTYF | -0.24 | 12 | 41.67 |
| prl_DEWYHYTOK | 1.73  | 10 | 50.00 |
| prl_ZULUGAFYV | -1.6  | 10 | 50.00 |
| prl_WYDAJONEZ | -0.24 | 14 | 50.00 |
| prl_KALELEHAZ | -0.24 | 7  | 42.86 |
| prl_LEJODASIT | 0.76  | 8  | 87.50 |
| prl_NYKUZOBYW | -1.23 | 10 | 40.00 |
| prl_KEBUSYZEG | 0.85  | 15 | 40.00 |

---

---

|                |       |    |       |
|----------------|-------|----|-------|
| prl_SISAVYKYW  | −0.51 | 15 | 33.33 |
| prl_GOKYHYPAP  | −0.5  | 12 | 58.33 |
| prl_MOVONIJYS  | −1.54 | 12 | 41.67 |
| prl_WAHILYWOP  | 0.76  | 11 | 54.55 |
| prl_BUKYLOFYP  | −1.2  | 7  | 57.14 |
| prl_SYJODUVEG  | −0.24 | 10 | 40.00 |
| prl_ZOVAZADEJ  | −2.24 | 16 | 18.75 |
| prl_LIKALIKIL  | −0.24 | 8  | 50.00 |
| prl_TASITUZUN  | −1.18 | 15 | 40.00 |
| prl_ZYSYKYZYG  | −2.2  | 12 | 58.33 |
| prl_MENOGUNEJ  | −0.24 | 7  | 57.14 |
| prl_VEJOMIPAK  | 0.73  | 17 | 41.18 |
| prl_HIJAVITUM  | −0.15 | 11 | 18.18 |
| prl_HEWUVOVUZ  | −0.06 | 9  | 22.22 |
| prl_TETUVUNIT  | 0.76  | 8  | 50.00 |
| prl_LAVEFYNEF  | 1.74  | 20 | 25.00 |
| prl_ZOPYKAHIB  | −1.24 | 13 | 23.08 |
| prl_KUKUNOWOH  | −0.27 | 8  | 50.00 |
| prl_LUJIDOKUL  | −0.6  | 16 | 68.75 |
| prl_ZELILYPYK  | 0.85  | 11 | 36.36 |
| prl_FOLUDAPEL  | −0.24 | 16 | 25.00 |
| prl_MOJUNIFAM  | −1.08 | 9  | 44.44 |
| prl_HEDYLOSAK  | −0.24 | 13 | 38.46 |
| prl_WAGIPEBEK  | −1.24 | 12 | 41.67 |
| prl_KILISASOT  | −2.45 | 11 | 18.18 |
| prl_BYDEBYWAP  | −0.2  | 10 | 80.00 |
| prl_FEDOVADUL  | −0.24 | 14 | 21.43 |
| prl_FAVEDOGYF  | 0.76  | 9  | 22.22 |
| prl_WYJYZUGEB  | −1.12 | 8  | 50.00 |
| prl_POTIZOBIJ  | −2.15 | 8  | 25.00 |
| prl_TEDUMYMUT  | −2.2  | 20 | 25.00 |
| prl_SAKYZUFOW  | 0.8   | 7  | 42.86 |
| prl_LIWYGUZZAZ | −0.24 | 11 | 54.55 |
| prl_TINUKETAF  | −0.24 | 12 | 41.67 |
| prl_PUHYBOJOJ  | −0.24 | 8  | 37.50 |
| prl_LYVATYPAB  | −1.24 | 12 | 33.33 |
| prl_NITUTOKUT  | −0.15 | 20 | 30.00 |
| prl_TEBYHYJAW  | 0.76  | 11 | 45.45 |
| prl_SYBYKYZEG  | −1.23 | 21 | 33.33 |
| prl_MEBABONUN  | 0.76  | 7  | 14.29 |
| prl_KOBYZYGUV  | −3.15 | 12 | 33.33 |
| prl_WUWOVEPUM  | −0.15 | 16 | 62.50 |
| prl_DOLIFYGIG  | −1.24 | 26 | 30.77 |
| prl_MEJAZALAD  | −0.2  | 8  | 50.00 |
| prl_JEJYWAPOJ  | 0.76  | 13 | 38.46 |
| prl_DYLIZIJOL  | −1.23 | 8  | 25.00 |
| prl_VOGAHOSEB  | −2.24 | 10 | 50.00 |
| prl_FOFANISAW  | 0.76  | 15 | 60.00 |
| prl_PEZYWELUV  | −1.15 | 10 | 30.00 |
| prl_NUMIZOWOK  | −0.24 | 14 | 50.00 |
| prl_GYNOHUZUZ  | 0.73  | 12 | 50.00 |

---

---

|                |       |    |       |
|----------------|-------|----|-------|
| prl_VYMIGYTUN  | −0.24 | 7  | 42.86 |
| prl_NIGOMEJUZ  | −0.04 | 7  | 42.86 |
| prl_MYGATYFAH  | −0.15 | 18 | 22.22 |
| prl_MOMUFYFIH  | −0.45 | 10 | 40.00 |
| prl_ZYPIKOVUF  | −0.24 | 7  | 71.43 |
| prl_FYNUFYBYB  | 0.76  | 7  | 28.57 |
| prl_VUGATUZIT  | 0.05  | 9  | 11.11 |
| prl_BOJABYBUV  | −2.15 | 11 | 54.55 |
| prl_HOMATEVAZ  | −0.6  | 8  | 50.00 |
| prl_ZYJIKEBIP  | 0.76  | 8  | 50.00 |
| prl_SEHEFYFYM  | −0.23 | 14 | 28.57 |
| prl_LAFESOSUV  | −2.11 | 10 | 40.00 |
| prl_KEDYKATOZ  | 0.76  | 10 | 40.00 |
| prl_JIWYSIMUJ  | 1.73  | 15 | 40.00 |
| prl_ZUWYDATAJ  | −0.24 | 8  | 50.00 |
| prl_HEMANANAW  | 0.04  | 11 | 45.45 |
| prl_ZUWOHOZEM  | −3.23 | 16 | 50.00 |
| prl_DEWOVASYM  | −2.23 | 11 | 45.45 |
| prl_WYNYPUFIB  | −0.04 | 9  | 55.56 |
| prl_DITUTIFOV  | −0.24 | 9  | 55.56 |
| prl_LOMYNYPOK  | −0.6  | 10 | 40.00 |
| prl_WEGAWUPYL  | 0.73  | 7  | 57.14 |
| prl_PEHIIWIB   | −0.24 | 12 | 50.00 |
| prl_LITAZAZAD  | −1.24 | 7  | 14.29 |
| prl_BASYZOKAN  | −1.53 | 9  | 22.22 |
| prl_FAJISEWUD  | −0.15 | 11 | 54.55 |
| prl_ZAWYNONUK  | 0.76  | 7  | 42.86 |
| prl_VEVENYZYZ  | −2.24 | 15 | 40.00 |
| prl_ZIZAZEFAP  | −1.23 | 14 | 42.86 |
| prl_KYHYWIMED  | −0.15 | 11 | 81.82 |
| prl_JILALYTEP  | −0.24 | 8  | 62.50 |
| prl_SIVIMANYN  | −1.24 | 10 | 60.00 |
| prl_TEBIPOJUG  | 0.82  | 9  | 55.56 |
| prl_DAZOWUBOW  | 0.85  | 11 | 36.36 |
| prl_PETESOSEG  | −0.6  | 7  | 71.43 |
| prl_LOFYMONUV  | −0.2  | 9  | 66.67 |
| prl_BUSOTUHEK  | −1.24 | 12 | 41.67 |
| prl_MYKIVOWAD  | −1.24 | 12 | 41.67 |
| prl_MEHYFYNYW  | 1.76  | 11 | 36.36 |
| prl_PYHEGILYZ  | −0.15 | 13 | 53.85 |
| prl_GOGESIESIF | −0.24 | 17 | 29.41 |
| prl_VUSIPAKAH  | −1.54 | 7  | 71.43 |
| prl_MUWUHUWUB  | −1.24 | 7  | 71.43 |
| prl_KOWUBEJEF  | −0.15 | 22 | 36.36 |
| prl_PUTAKYMOJ  | 0.76  | 9  | 55.56 |
| prl_TABEFYNOB  | −0.24 | 12 | 25.00 |
| prl_LUZANAWEP  | 0.05  | 7  | 28.57 |
| prl_VOTAFYKYT  | 0.46  | 12 | 8.33  |
| prl_SIGUJANOL  | −1.45 | 10 | 10.00 |
| prl_VOSYFANAS  | −0.16 | 9  | 44.44 |
| prl_KAPOJYSAP  | −3.53 | 12 | 16.67 |

---



|               |       |    |       |
|---------------|-------|----|-------|
| prl_SYGAHESAZ | -1.24 | 8  | 50.00 |
| prl_LEVUZELUS | -0.45 | 14 | 50.00 |
| prl_ZASOBEWYP | -0.07 | 10 | 40.00 |
| prl_LETISIGUS | -1.15 | 13 | 38.46 |
| prl_ZABYNYTYT | -1.23 | 11 | 18.18 |
| prl_VUPAMIPEP | -0.27 | 7  | 42.86 |
| prl_SUGIGAKAV | -1.23 | 8  | 25.00 |
| prl_BOKOHUGUP | -0.15 | 8  | 62.50 |
| prl_ZIJKYLAZ  | 0.76  | 13 | 38.46 |
| prl_WUZAKYBOD | -0.51 | 12 | 8.33  |
| prl_BUWOBYJAH | -1.26 | 18 | 33.33 |
| prl_TEDUBUJYJ | 0.96  | 11 | 36.36 |
| prl_PYLIZUFIP | -0.15 | 11 | 45.45 |
| prl_ZYZENOTIV | -0.24 | 8  | 37.50 |
| prl_WEDUDEFEW | -3.23 | 9  | 44.44 |
| prl_MOGIPINOH | -0.23 | 7  | 42.86 |
| prl_GEHUBAWIB | -1.24 | 13 | 23.08 |
| prl_DILAJOGIT | -0.24 | 12 | 25.00 |
| prl_MIGABOHYH | 0.76  | 9  | 22.22 |
| prl_TYWAFOTEF | -1.16 | 15 | 60.00 |
| prl_KUMOFIVUP | -2.23 | 13 | 23.08 |
| prl_NIKOSAKEW | -1.15 | 9  | 44.44 |
| prl_VISUKOBEB | 1.79  | 10 | 30.00 |
| prl_BOKASEBIW | -2.53 | 8  | 25.00 |
| prl_LALEZENUB | -0.16 | 7  | 28.57 |
| prl_BOLYDUPAL | -0.15 | 15 | 33.33 |
| prl_MABYPUKOG | -2.14 | 19 | 15.79 |
| prl_GYMYPEWED | -1.15 | 13 | 61.54 |
| prl_HYFAGOMIT | -1.15 | 9  | 33.33 |
| prl_ZENOHIHEL | -0.6  | 8  | 50.00 |
| prl_JYPEJEKAK | 0.76  | 10 | 30.00 |
| prl_SUTEDOGIS | -0.24 | 7  | 57.14 |
| prl_ZUMUDYNUK | -1.24 | 9  | 44.44 |
| prl_JEFIWOBAG | 0.75  | 25 | 48.00 |
| prl_TYGAHONAS | -0.15 | 13 | 53.85 |
| prl_KOHYMUHOV | -0.24 | 10 | 30.00 |
| prl_KIGIMYLOD | -0.24 | 16 | 50.00 |
| prl_DYJUVETYT | -0.24 | 8  | 50.00 |
| prl_BEWETYDAP | -0.54 | 12 | 50.00 |
| prl_KEHIHODAW | 0.76  | 12 | 50.00 |
| prl_WIKUDUBON | -2.23 | 8  | 50.00 |
| prl_VYTYGOKUS | -0.54 | 9  | 44.44 |
| prl_HUGIGISEB | -1.2  | 16 | 50.00 |
| prl_MYWABITOP | 0.88  | 13 | 46.15 |
| prl_KEVASOWOK | 0.4   | 8  | 25.00 |
| prl_PIMENAPOP | 0.74  | 15 | 46.67 |
| prl_LANAHUWAS | -1.15 | 10 | 40.00 |
| prl_BUDABEDAZ | -0.24 | 15 | 53.33 |
| prl_LATEWOZUJ | -2.14 | 12 | 50.00 |
| prl_HADUHOPEH | 0.76  | 10 | 30.00 |
| prl_MUFOSYLAH | -0.04 | 10 | 40.00 |

---

|               |       |    |       |
|---------------|-------|----|-------|
| prl_NALIWEPYT | -0.24 | 18 | 27.78 |
| prl_HAMUSELOP | -0.12 | 26 | 34.62 |
| prl_BAVUKUSUL | -0.15 | 9  | 55.56 |
| prl_MOMUTAMEF | 0.76  | 12 | 33.33 |
| prl_ZIGESIZED | -2.23 | 12 | 25.00 |
| prl_BIVIKANY  | 0.46  | 11 | 9.09  |
| prl_SUVOLANAT | 0.76  | 11 | 54.55 |
| prl_PIMEZUFAS | -2.17 | 13 | 61.54 |
| prl_PUWIKUGAJ | 0.85  | 13 | 38.46 |
| prl_LEDYJYGUD | -0.6  | 13 | 15.38 |
| prl_ZAZIBYKEH | -0.51 | 10 | 40.00 |
| prl_JALAKIDAB | -3.23 | 19 | 68.42 |
| prl_TENIBIVAM | -0.24 | 7  | 28.57 |
| prl_NAFYNAHYT | -0.24 | 14 | 42.86 |
| prl_DUSAFIBYK | -1.24 | 8  | 12.50 |
| prl_POTAHEVUT | -1.45 | 12 | 16.67 |
| prl_GENIPANYP | -1.24 | 11 | 18.18 |
| prl_TUKEMIZYL | -1.24 | 12 | 41.67 |
| prl_MYBAPIZAD | -1.97 | 10 | 20.00 |
| prl_KUBYVYTOM | 0.76  | 9  | 44.44 |
| prl_SUSYBODOK | -0.15 | 8  | 50.00 |
| prl_NOWYPEMIB | -0.24 | 7  | 28.57 |
| prl_HEHEVUBAB | -0.24 | 10 | 50.00 |
| prl_LOJIDATIK | -2.16 | 7  | 57.14 |
| prl_HEPYLYWYM | -2.15 | 8  | 62.50 |
| prl_LANEVUJIN | 0.73  | 11 | 54.55 |
| prl_GOKIDEWUZ | -1.24 | 7  | 42.86 |
| prl_SYDAFIZUM | -0.24 | 11 | 45.45 |
| prl_GIPISABAV | 0.46  | 10 | 10.00 |
| prl_GOBUKAMIH | -1.16 | 7  | 57.14 |
| prl_FEZUJELYJ | -2.17 | 15 | 46.67 |
| prl_HUSEGEPUG | 0.73  | 8  | 50.00 |
| prl_POSOVESYS | 1.76  | 8  | 37.50 |
| prl_JAJILVIP  | -1.24 | 13 | 38.46 |
| prl_MOHAVYDIF | 0.76  | 7  | 28.57 |
| prl_TIBUDITYS | 0.76  | 10 | 50.00 |
| prl_DIGANIVOH | -0.54 | 8  | 37.50 |
| prl_PEDOWYBYH | -0.21 | 8  | 37.50 |
| prl_HUJOGIJIM | -0.24 | 7  | 42.86 |
| prl_PABUFYLEL | -0.24 | 17 | 29.41 |
| prl_MIFYBYMAS | -0.24 | 7  | 28.57 |
| prl_WOGIHUKYV | -0.24 | 14 | 21.43 |
| prl_LOMEVUJEG | -3.11 | 15 | 40.00 |
| prl_BUDUSIWUS | 0.79  | 14 | 35.71 |
| prl_GIMYLEGUS | 0.76  | 13 | 38.46 |
| prl_MYVEWEMUS | -1.15 | 8  | 37.50 |
| prl_LODATONIN | 0.76  | 11 | 54.55 |
| prl_GOBIGAHOZ | -0.15 | 17 | 41.18 |
| prl_LILILIPAN | -0.24 | 14 | 21.43 |
| prl_LUWIMYSUD | -0.24 | 7  | 14.29 |
| prl_NOFOHIKIN | -0.15 | 10 | 30.00 |

---

---

|                |       |    |       |
|----------------|-------|----|-------|
| prl_LEKAWOMUV  | −1.24 | 10 | 70.00 |
| prl_LALONOPYM  | −0.27 | 8  | 50.00 |
| prl_LIHATESUN  | −3.15 | 8  | 37.50 |
| prl_HAWEZUPOL  | −0.24 | 11 | 36.36 |
| prl_HILEGUDOG  | −2.14 | 14 | 42.86 |
| prl_HOWUPAFUD  | 0.96  | 9  | 44.44 |
| prl_VADADYMUUV | −2.26 | 8  | 75.00 |
| prl_FIZAZIVEL  | 0.76  | 15 | 40.00 |
| prl_BIZAMYDAT  | −2.54 | 16 | 37.50 |
| prl_KIBIMAJOP  | −0.27 | 8  | 50.00 |
| prl_BONYWELBY  | −1.23 | 19 | 57.89 |
| prl_PAGYBUGOT  | −0.24 | 8  | 25.00 |
| prl_BEWIKOSIG  | −1.2  | 13 | 15.38 |
| prl_KIMEGOSAW  | −2.24 | 8  | 37.50 |
| prl_DUDYGYMUP  | −0.24 | 19 | 57.89 |
| prl_MAWINYFYH  | −0.24 | 16 | 25.00 |
| prl_TOSYGIDIH  | −0.24 | 12 | 41.67 |
| prl_ZOFATOTIJ  | −2.07 | 12 | 50.00 |
| prl_TENEZOPUN  | −1.24 | 7  | 42.86 |
| prl_LUDYMYNIM  | −0.53 | 11 | 54.55 |
| prl_ZYJILOSUM  | 1.76  | 9  | 55.56 |
| prl_FIBOBAPIP  | −1.15 | 17 | 35.29 |
| prl_DIVIMOVOF  | −2.24 | 15 | 53.33 |
| prl_PYPIGIVOG  | −2.24 | 10 | 60.00 |
| prl_PUSUWYJIM  | −1.15 | 9  | 66.67 |
| prl_KOZIDUDOZ  | −0.24 | 8  | 87.50 |
| prl_GYTYWEMUH  | −0.26 | 7  | 57.14 |
| prl_GYVYBYDED  | −0.24 | 8  | 37.50 |
| prl_DENANYMUT  | −0.27 | 7  | 71.43 |
| prl_BIMOLUWEP  | −0.24 | 15 | 13.33 |
| prl_MUGABYLUL  | 0.76  | 8  | 37.50 |
| prl_FADONUFEF  | −1.15 | 10 | 20.00 |
| prl_SINIGUWIJ  | −0.25 | 13 | 38.46 |
| prl_DAVENEDAF  | −2.54 | 14 | 28.57 |
| prl_WYZELEBUL  | −0.26 | 7  | 28.57 |
| prl_LEBOGIPUP  | −2.24 | 11 | 27.27 |
| prl_DOSODYDYW  | −0.6  | 7  | 28.57 |
| prl_NIJODYHUF  | −1.24 | 8  | 62.50 |
| prl_GEZUGOWOD  | −2.17 | 12 | 66.67 |
| prl_GUMOPIKUP  | −0.04 | 8  | 50.00 |
| prl_KOLEFAWON  | 0.79  | 8  | 37.50 |
| prl_PISIPYHIZ  | −0.24 | 8  | 50.00 |
| prl_ZITALAHOP  | −0.15 | 16 | 50.00 |
| prl_TYVOPYJYH  | −0.95 | 7  | 28.57 |
| prl_VEFEZISAS  | −0.24 | 13 | 38.46 |
| prl_ZUPOKOTOH  | −1.23 | 12 | 25.00 |
| prl_KAGUHUTOM  | −1.23 | 10 | 40.00 |
| prl_LALOBYLOM  | −0.24 | 12 | 58.33 |
| prl_HAGOLYKIS  | −1.24 | 9  | 77.78 |
| prl_KEGIWOFUB  | 2.76  | 12 | 33.33 |
| prl_PUSIJIMOH  | 0.76  | 10 | 60.00 |

---

---

|               |       |    |       |
|---------------|-------|----|-------|
| prl_TONOLYDAB | −0.24 | 8  | 50.00 |
| prl_NAGUNAPIW | −0.45 | 8  | 50.00 |
| prl_GYNAKUSYG | 0.76  | 13 | 38.46 |
| prl_JUTYTODET | −0.08 | 11 | 36.36 |
| prl_DITITESUB | −3.16 | 11 | 36.36 |
| prl_MAZONEWEK | 0.76  | 11 | 36.36 |
| prl_PINUWEBUZ | −1.24 | 10 | 20.00 |
| prl_SIBEJUFEJ | −0.24 | 10 | 40.00 |
| prl_GYBIHEHUW | −2.26 | 12 | 58.33 |
| prl_WYTYLOFOB | −0.15 | 20 | 25.00 |
| prl_GIMIJDEN  | −1.51 | 13 | 23.08 |
| prl_FUHUBEPYH | −2.16 | 9  | 66.67 |
| prl_KIGODILAT | −0.04 | 17 | 11.76 |
| prl_TOHEDIMAK | −0.26 | 17 | 41.18 |
| prl_ZUHUNOBUJ | 1.76  | 13 | 53.85 |
| prl_VATAWIPUW | −0.24 | 11 | 36.36 |
| prl_SOTIBUDEW | −1.54 | 9  | 22.22 |
| prl_MIHONYMEP | −2.24 | 12 | 58.33 |
| prl_KYGYDYTOF | −0.19 | 10 | 30.00 |
| prl_LEDUTAGOV | −0.24 | 8  | 37.50 |
| prl_SASYTUZUW | 0.4   | 11 | 54.55 |
| prl_PEFUWEVES | −0.27 | 10 | 80.00 |
| prl_JATEWYMIJ | −2.24 | 8  | 37.50 |
| prl_TUPYVITUH | 0.8   | 10 | 50.00 |
| prl_WIVEGAJOZ | −2.23 | 14 | 14.29 |
| prl_LOLOVAHUN | 0.76  | 14 | 42.86 |
| prl_DAFYLIVOJ | 0.76  | 21 | 42.86 |
| prl_GINYWAJYP | −1.18 | 8  | 62.50 |
| prl_ZOGOZYMUK | −1.24 | 10 | 30.00 |
| prl_MIKASAJUD | 0.76  | 11 | 63.64 |
| prl_ZOLUFAZYB | −2.26 | 9  | 44.44 |
| prl_LAJOVEPUV | −0.54 | 12 | 58.33 |
| prl_NAMUKEFUM | −3.23 | 16 | 62.50 |
| prl_DYBEKELYP | −3.15 | 16 | 12.50 |
| prl_PYFAHOVIF | −0.15 | 13 | 53.85 |
| prl_WEJUMYMIV | −0.15 | 10 | 80.00 |
| prl_DIJAHABIB | −2.15 | 19 | 57.89 |
| prl_KAFUTOSUT | 0.76  | 13 | 38.46 |
| prl_ZODIHUFUV | 0.85  | 16 | 50.00 |
| prl_SYDYZYWEJ | −0.24 | 7  | 28.57 |
| prl_SUHONUTIL | −0.24 | 20 | 20.00 |
| prl_LYNUKEPEZ | −1.06 | 10 | 10.00 |
| prl_WEWODOLYT | −1.24 | 9  | 55.56 |
| prl_GYFASUJAW | −0.2  | 7  | 57.14 |
| prl_HOVIHYKUF | −2.24 | 13 | 53.85 |
| prl_HIJADEWEM | −0.21 | 7  | 28.57 |
| prl_WOTUNYKEM | −1.24 | 11 | 9.09  |
| prl_TEWOWOMUB | −0.04 | 9  | 44.44 |
| prl_BEVEBAJUV | −1.24 | 16 | 43.75 |
| prl_VUSEWAFOH | −0.24 | 11 | 63.64 |
| prl_BOJOZAPIN | 0.76  | 12 | 33.33 |

---

---

|                |       |    |       |
|----------------|-------|----|-------|
| prl_TIFOPIKAM  | 0.73  | 8  | 62.50 |
| prl_TUKEJOLOZ  | 0.96  | 15 | 40.00 |
| prl_FALUJYPYZ  | -0.23 | 9  | 44.44 |
| prl_MAVEMEMAF  | -3.23 | 12 | 25.00 |
| prl_NISEPYDOP  | -0.26 | 14 | 21.43 |
| prl_GETYPUWEH  | 0.73  | 13 | 38.46 |
| prl_WEHELASEB  | -2.59 | 9  | 22.22 |
| prl_SEMOWIHOH  | 0.76  | 15 | 46.67 |
| prl_TOWUZUSEZ  | -2.06 | 9  | 22.22 |
| prl_KUDILOBEN  | 0.93  | 11 | 54.55 |
| prl_GAZUFISYN  | -0.26 | 7  | 57.14 |
| prl_WUHOTYZIF  | -2.23 | 13 | 38.46 |
| prl_JIPAZUHOB  | -0.24 | 9  | 55.56 |
| prl_SEFUKEHOZ  | -1.18 | 14 | 50.00 |
| prl_WABUSOSOK  | -1.24 | 7  | 42.86 |
| prl_LITAPUPET  | -3.23 | 14 | 42.86 |
| prl_TYFASOSOD  | -1.24 | 9  | 33.33 |
| prl_GIKABYGYS  | -0.24 | 8  | 62.50 |
| prl_GOHANOPYV  | 1.05  | 10 | 10.00 |
| prl_NYDYGISAW  | -1.16 | 10 | 50.00 |
| prl_DILYTUWOS  | -1.04 | 10 | 40.00 |
| prl_LYHATIMOM  | -0.24 | 9  | 22.22 |
| prl_GABYGETOB  | 0.76  | 9  | 44.44 |
| prl_BYVYBIDIH  | 0.82  | 8  | 25.00 |
| prl_LIFYNOZIM  | -2.26 | 9  | 44.44 |
| prl_BYHAMUDIS  | -1.23 | 13 | 46.15 |
| prl_JUZOTISUH  | -1.45 | 15 | 40.00 |
| prl_HYBANAZEB  | 0.76  | 7  | 85.71 |
| prl_TYSITUGYJ  | -0.15 | 14 | 64.29 |
| prl_LIKOTALAG  | -0.24 | 8  | 25.00 |
| prl_GEJIVOVAT  | -1.15 | 13 | 46.15 |
| prl_SEGYNAWOW  | -2.15 | 10 | 60.00 |
| prl_ZOVIBASYJ  | -2.26 | 9  | 44.44 |
| prl_FYTUNAGEJ  | -0.24 | 15 | 26.67 |
| prl_BEHUDESIJ  | -1.24 | 8  | 37.50 |
| prl_SEVYPUGOG  | 1.74  | 17 | 41.18 |
| prl_VUSUFYPAT  | -0.15 | 13 | 53.85 |
| prl_FYGOWEKEYV | -0.24 | 9  | 11.11 |
| prl_VIVIFULOK  | -3.23 | 16 | 37.50 |
| prl_TOWIKETEG  | -2.53 | 9  | 44.44 |
| prl_DIFILETIS  | -2.24 | 11 | 54.55 |
| prl_TIWUNETYM  | -2.45 | 11 | 36.36 |
| prl_JABUWOBE   | -1.94 | 22 | 9.09  |
| prl_LUPUMEJIL  | 0.76  | 9  | 33.33 |
| prl_MEJUVEMIZ  | -0.15 | 11 | 27.27 |
| prl_SALOPINON  | -1.24 | 16 | 37.50 |
| prl_HILYMUFAW  | -0.04 | 10 | 30.00 |
| prl_DUBOSIHEJ  | -3.16 | 15 | 33.33 |
| prl_VALOTUTES  | -0.15 | 9  | 44.44 |
| prl_KUBEVUGUW  | -0.15 | 10 | 40.00 |
| prl_MEMUSOFIT  | -0.24 | 9  | 66.67 |

---

---

|                |       |    |       |
|----------------|-------|----|-------|
| prl_FATUMOHYW  | −0.04 | 8  | 25.00 |
| prl_VIGIHETEN  | −2.04 | 12 | 58.33 |
| prl_DIZEHIWYK  | −0.24 | 10 | 60.00 |
| prl_NUJUDYTUJ  | 0.76  | 11 | 63.64 |
| prl_HYTYHOFOH  | −1.23 | 15 | 20.00 |
| prl_MEFAGUVYG  | −1.15 | 11 | 63.64 |
| prl_NIKIFYPYM  | −1.24 | 10 | 50.00 |
| prl_NINAGULOL  | −1.24 | 8  | 50.00 |
| prl_KENINAHHEL | 0.76  | 11 | 36.36 |
| prl_VASYVALUV  | −1.16 | 7  | 57.14 |
| prl_PYVOVISUH  | −0.24 | 12 | 75.00 |
| prl_JUSEWIPUM  | 0.76  | 8  | 37.50 |
| prl_GETULADEJ  | −1.24 | 19 | 31.58 |
| prl_WANIBOBOB  | 1.76  | 15 | 40.00 |
| prl_LOTOPOTUJ  | −0.15 | 12 | 25.00 |
| prl_NOBYSENYG  | −3.19 | 24 | 20.83 |
| prl_WETALYBYW  | −1.24 | 7  | 57.14 |
| prl_ZUMYMYFAD  | −2.24 | 8  | 50.00 |
| prl_SAMEJAJEW  | 1.76  | 9  | 11.11 |
| prl_FIHEBUDYZ  | 0.79  | 9  | 22.22 |
| prl_HIGIWYVID  | 1.8   | 19 | 36.84 |
| prl_HEDOTEBYW  | −2.07 | 15 | 26.67 |
| prl_HALUTAGAL  | −0.24 | 10 | 40.00 |
| prl_JELYMOFEG  | −1.15 | 12 | 58.33 |
| prl_VEBYWOF AJ | −0.24 | 9  | 55.56 |
| prl_KYNILIFAP  | −0.12 | 7  | 57.14 |
| prl_WUSOPANIK  | −1.24 | 13 | 46.15 |
| prl_FESUBYBYP  | −0.24 | 18 | 33.33 |
| prl_BESOKIVIK  | −0.27 | 7  | 42.86 |
| prl_LIFYPEZOT  | −1.24 | 14 | 28.57 |
| prl_LOBETILIP  | −3.44 | 21 | 38.10 |
| prl_MEHUFABAD  | −0.15 | 10 | 50.00 |
| prl_LAGUSIJIG  | −0.24 | 16 | 31.25 |
| prl_NIMYNYKYD  | −0.15 | 18 | 66.67 |
| prl_GUTYWYWEG  | 0.85  | 15 | 53.33 |
| prl_WUVIHEKYK  | −1.24 | 14 | 50.00 |
| prl_TIZIBAZEB  | −2.45 | 19 | 42.11 |
| prl_GOBYPAHAG  | −0.24 | 16 | 25.00 |
| prl_ZATUMUGEP  | −0.6  | 8  | 12.50 |
| prl_GUFAKEMOM  | −1.26 | 13 | 38.46 |
| prl_LOZEPOKAF  | −0.15 | 14 | 28.57 |
| prl_PAGOLEGYL  | −0.2  | 12 | 58.33 |
| prl_ZYPETUTEK  | −1.24 | 11 | 72.73 |
| prl_DAMYLYHUK  | −1.24 | 9  | 66.67 |
| prl_JAHAMASUM  | −0.2  | 8  | 62.50 |
| prl_LANUJANYB  | 1.82  | 18 | 55.56 |
| prl_WAZAPABYT  | −0.15 | 7  | 42.86 |
| prl_SEKUNYFEG  | 0.76  | 12 | 33.33 |
| prl_HEWUJIK EB | −2.16 | 8  | 62.50 |
| prl_FAZONONIS  | 0.85  | 16 | 25.00 |
| prl_TAPYHOLAT  | −0.24 | 12 | 25.00 |

---

---

|               |       |    |       |
|---------------|-------|----|-------|
| prl_DUSAMUZYs | -2.14 | 11 | 45.45 |
| prl_POWAGAZEZ | -0.24 | 12 | 41.67 |
| prl_POZASAMOF | -1.6  | 8  | 75.00 |
| prl_SUWILUPIF | 0.76  | 13 | 38.46 |
| prl_VONOVYHET | -1.14 | 23 | 21.74 |
| prl_BOBUFEMUH | -0.18 | 11 | 36.36 |
| prl_VOWIZUSEM | -0.07 | 7  | 42.86 |
| prl_NOSEZIZAN | -0.24 | 11 | 9.09  |
| prl_HEBAKABEV | -2.45 | 9  | 44.44 |
| prl_BIKAKESIN | 0.76  | 12 | 33.33 |
| prl_GYTEGIVAK | -1.24 | 13 | 53.85 |
| prl_LULIDATIT | -0.24 | 7  | 42.86 |
| prl_MIVITOMEH | -0.24 | 10 | 40.00 |
| prl_JYNABEKUJ | -0.07 | 7  | 42.86 |
| prl_VEPOKOVIL | -0.24 | 8  | 37.50 |
| prl_DYLYDUKUG | -0.6  | 7  | 0.00  |
| prl_NILUZESAZ | 1.74  | 20 | 50.00 |
| prl_WIGOVAFYZ | 0.79  | 8  | 37.50 |
| prl_POSUHULIZ | -0.15 | 8  | 50.00 |
| prl_MUJEKYNOJ | -0.15 | 8  | 37.50 |
| prl_SATYZYLYM | -1.24 | 13 | 46.15 |
| prl_PIFAJIPAL | -0.24 | 13 | 53.85 |
| prl_VULYTAGAZ | 0.76  | 10 | 50.00 |
| prl_HEFUMIHIB | -0.24 | 14 | 71.43 |
| prl_WEPYNOSUW | 0.76  | 18 | 16.67 |
| prl_LYNUVEHYN | -1.26 | 12 | 50.00 |
| prl_LASUPEGEV | -3.16 | 13 | 38.46 |
| prl_LOTIPIPIV | -0.24 | 7  | 28.57 |
| prl_JYSONEZAW | -2.16 | 9  | 44.44 |
| prl_FAMONUPIN | -3.14 | 22 | 18.18 |
| prl_KOVELYJYP | -0.15 | 7  | 42.86 |
| prl_MAVOSITUV | -0.15 | 7  | 42.86 |
| prl_DYPUKAGYS | -1.16 | 15 | 53.33 |
| prl_MAHONYTYF | -2.26 | 8  | 50.00 |
| prl_DOHODOZYS | -0.54 | 11 | 72.73 |
| prl_SYTYSESAJ | -0.24 | 8  | 12.50 |
| prl_KAKYHEPIG | -1.24 | 8  | 37.50 |
| prl_WAFAWETAP | -0.51 | 9  | 33.33 |
| prl_TOPABAHOS | -0.24 | 7  | 57.14 |
| prl_KYGIDAPUP | -0.15 | 9  | 66.67 |
| prl_DIPAPIGIB | -1.14 | 22 | 22.73 |
| prl_DOSADEWAZ | -0.2  | 12 | 83.33 |
| prl_JOGOGIGIM | -1.24 | 13 | 23.08 |
| prl_BIDUVIFEB | -0.41 | 7  | 57.14 |
| prl_PIKUPEGIJ | -1.24 | 10 | 50.00 |
| prl_HOLAVUGOF | -1.26 | 10 | 40.00 |
| prl_BYZOBIZYS | -1.15 | 7  | 57.14 |
| prl_VATOGESYM | -0.24 | 8  | 62.50 |
| prl_NILEDUNIS | 0.73  | 9  | 55.56 |
| prl_HYHYPOWYT | -0.27 | 8  | 50.00 |
| prl_PYVELATIJ | -3.03 | 10 | 60.00 |

---

---

|               |       |    |       |
|---------------|-------|----|-------|
| prl_PUKIZAPON | 0.73  | 16 | 43.75 |
| prl_WAKIMOJEP | -0.23 | 12 | 41.67 |
| prl_JEKAGALEN | 0.76  | 15 | 40.00 |
| prl_PYTUHIPAK | 0.55  | 9  | 11.11 |
| prl_SAHYPAFEV | -1.15 | 10 | 40.00 |
| prl_FUMALIKUP | -0.15 | 9  | 44.44 |
| prl_ZYSEBALIV | -1.24 | 9  | 44.44 |
| prl_BYVONABUH | 0.75  | 27 | 29.63 |
| prl_TUZEBAUD  | 0.8   | 18 | 44.44 |
| prl_BAVIMOSYW | 0.79  | 9  | 22.22 |
| prl_FEJEFOVEW | -2.24 | 15 | 53.33 |
| prl_FAFEDONAV | -1.24 | 7  | 57.14 |
| prl_KANOJYPAM | -1.45 | 11 | 18.18 |
| prl_HYBADUJOF | -1.45 | 12 | 33.33 |
| prl_MEGEGOSUM | -1.18 | 12 | 25.00 |
| prl_PASIKUKOW | -0.24 | 9  | 33.33 |
| prl_NUDUWOGAD | 0.76  | 10 | 60.00 |
| prl_BYJYJYLET | -1.07 | 9  | 33.33 |
| prl_MIWOWIZYD | -2.17 | 9  | 44.44 |
| prl_NIZOLYMID | -0.16 | 10 | 40.00 |
| prl_ZEMABUGYT | -3.25 | 20 | 40.00 |
| prl_KYHYDONUZ | 0.76  | 11 | 36.36 |
| prl_JEKYPIVOM | 0.85  | 7  | 42.86 |
| prl_PYNIGUWES | -2.23 | 12 | 33.33 |
| prl_TINOSYTEM | 0.85  | 15 | 40.00 |
| prl_TYWUFIMUL | -1.16 | 8  | 62.50 |
| prl_FOSULODEG | -0.15 | 8  | 37.50 |
| prl_TOZULIGAS | -3.23 | 13 | 30.77 |
| prl_JIPIWIFYN | -0.6  | 8  | 50.00 |
| prl_FELAKINEJ | -1.15 | 11 | 72.73 |
| prl_KIFEBAPON | 0.76  | 17 | 29.41 |
| prl_VUPUGYFEW | 0.76  | 7  | 57.14 |
| prl_GOHABAWEL | -0.15 | 11 | 36.36 |
| prl_NYFUTOMET | -1.05 | 10 | 20.00 |
| prl_SATITYKYW | -0.24 | 8  | 50.00 |
| prl_TYPILIVOK | 0.76  | 14 | 57.14 |
| prl_BIWUKOFUW | 0.76  | 10 | 50.00 |
| prl_HATEBAGYD | 0.76  | 9  | 55.56 |
| prl_WYFYHOFAD | -0.24 | 13 | 61.54 |
| prl_DEJEZAPAP | -2.23 | 13 | 15.38 |
| prl_JOTEGEDET | -1.23 | 16 | 25.00 |
| prl_DESUGIVEK | -0.04 | 12 | 41.67 |
| prl_ZEBUHEVAK | 2.8   | 14 | 35.71 |
| prl_BETYNIGUM | 0.76  | 12 | 16.67 |
| prl_BEWIVIGOB | -1.07 | 10 | 20.00 |
| prl_HIVEHAVYV | 1.76  | 9  | 55.56 |
| prl_DODYFIKEK | -3.06 | 21 | 14.29 |
| prl_VEVAMUGYB | -1.26 | 8  | 37.50 |
| prl_FEHOVOSIZ | 0.76  | 7  | 14.29 |
| prl_GELEFEMAS | -3.53 | 12 | 25.00 |
| prl_JEPUJYKOT | -2.08 | 9  | 22.22 |

---



---

|               |       |    |       |
|---------------|-------|----|-------|
| prl_VYGOLAJYB | −2.11 | 10 | 60.00 |
| prl_TIHVVILOD | −3.48 | 13 | 23.08 |
| prl_GYKIVAPOK | −2.23 | 15 | 53.33 |
| prl_SAPEBOVIW | −1.2  | 12 | 58.33 |
| prl_KIVYKINOW | 0.05  | 10 | 50.00 |
| prl_BIBOPUNOB | −0.6  | 11 | 54.55 |
| prl_WOPATULYG | −1.23 | 21 | 28.57 |
| prl_LUJIJONUF | 0.76  | 7  | 57.14 |
| prl_ZANIBYLIP | −2.15 | 17 | 52.94 |
| prl_DIPANUGAF | −1.12 | 9  | 44.44 |
| prl_JEGAWALAV | 1.04  | 12 | 33.33 |
| prl_FYMOLOFAK | −1.6  | 7  | 57.14 |
| prl_DYZATULEN | −1.2  | 14 | 57.14 |
| prl_JYJEDINUV | −2.07 | 14 | 28.57 |
| prl_JUDYKOSOM | −0.24 | 9  | 22.22 |
| prl_SYVYMONAK | −1.15 | 7  | 42.86 |
| prl_GOKYFYTYB | −0.26 | 12 | 50.00 |
| prl_ZABYHALIV | −1.26 | 7  | 57.14 |
| prl_NABYSANAK | −0.26 | 16 | 31.25 |
| prl_VIPAPIJOG | −0.15 | 12 | 50.00 |
| prl_FAMYTIFOJ | 0.46  | 13 | 46.15 |
| prl_POTELUPIJ | 0.85  | 15 | 40.00 |
| prl_HUKAZINUK | 0.76  | 11 | 54.55 |
| prl_FUSUWUDED | −1.14 | 14 | 14.29 |
| prl_PAKOBUMUV | 0.46  | 9  | 11.11 |
| prl_VUKATUJUL | 0.55  | 11 | 18.18 |
| prl_ZAZIVYHAL | −4.53 | 12 | 25.00 |
| prl_VAKEWEVYV | −0.15 | 13 | 53.85 |
| prl_BIGYLUHAH | 2.76  | 9  | 11.11 |
| prl_VUJITOSOL | 1.76  | 16 | 43.75 |
| prl_JYFETONID | −0.24 | 14 | 42.86 |
| prl_DUTABITEB | 0.76  | 10 | 50.00 |
| prl_GIGAJIMUK | 0.76  | 8  | 75.00 |
| prl_LAJIHOHYD | −1.24 | 18 | 27.78 |
| prl_FOJEDAMUP | 0.76  | 10 | 50.00 |
| prl_SEJUHIMUS | −1.24 | 7  | 57.14 |
| prl_FIBEGYNAV | −1.24 | 29 | 24.14 |
| prl_NUPABADED | −1.54 | 13 | 46.15 |
| prl_BENYVUFUP | −2.15 | 19 | 52.63 |
| prl_MYNAPUTAH | −0.16 | 7  | 42.86 |
| prl_WESOPYPYM | 0.76  | 9  | 55.56 |
| prl_JODEPYVID | 0.76  | 9  | 22.22 |
| prl_WAVIVYDEG | −3.19 | 13 | 53.85 |
| prl_TIFEJUDYF | −0.24 | 13 | 38.46 |
| prl_HOJETOBIT | −0.24 | 15 | 60.00 |
| prl_WUVYBYGAZ | 0.76  | 12 | 25.00 |
| prl_MOVUDEVIT | −1.26 | 15 | 33.33 |
| prl_LEWESIBEG | −2.16 | 14 | 21.43 |
| prl_FAPUNAPAS | 0.76  | 10 | 60.00 |
| prl_KOMETETIG | −0.24 | 7  | 71.43 |
| prl_ZIBUFUGEH | −0.24 | 15 | 53.33 |

---

|               |       |    |       |
|---------------|-------|----|-------|
| prl_WOZAGUWAJ | −1.24 | 12 | 41.67 |
| prl_SOFILYNAL | −0.24 | 10 | 50.00 |
| prl_DYNALAMIL | −0.15 | 16 | 43.75 |
| prl_KUPITIMIZ | −3.23 | 21 | 28.57 |
| prl_MIDYNYWUH | −2.14 | 23 | 17.39 |
| prl_HAGYKOLYL | 0.76  | 10 | 40.00 |
| prl_POLATAPAS | −1.15 | 12 | 25.00 |
| prl_PESUTIJIV | 0.96  | 8  | 50.00 |
| prl_TAZUVAHAD | −3.16 | 7  | 14.29 |
| prl_LAKUZUJAD | −2.54 | 18 | 33.33 |
| prl_MOWIPUDIV | 0.76  | 14 | 42.86 |
| prl_JAHALETOG | −0.5  | 9  | 55.56 |
| prl_MEDYPAGAH | −1.23 | 8  | 25.00 |
| prl BUMUPOVEB | −3.49 | 11 | 27.27 |
| prl_PIVUJANUW | −3.53 | 9  | 44.44 |
| prl_NATOVEJYF | −1.17 | 7  | 42.86 |
| prl_WEGIBIPIK | 0.76  | 8  | 50.00 |
| prl_FEMEFOSYL | 1.96  | 13 | 23.08 |
| prl_ZINASIPUT | −0.18 | 7  | 71.43 |
| prl_TEMATOWIB | −0.24 | 10 | 40.00 |
| prl_FAKEVOGEP | 1.46  | 10 | 30.00 |
| prl_KUVYFADEM | 1.73  | 9  | 44.44 |
| prl_ZETEVYPUW | −2.24 | 16 | 56.25 |
| prl_BAKUPEPYT | −1.12 | 8  | 50.00 |
| prl_NEWEVYJID | −1.12 | 17 | 29.41 |
| prl_LALISIDEK | −1.15 | 13 | 69.23 |
| prl_MOMIGOZAF | −2.23 | 11 | 45.45 |

**Table S2.** List of unique peptides and their physicochemical characteristics, identified in Spray-dried samples.

| prools_id     | Charge | Length | % Hydrophobicity |
|---------------|--------|--------|------------------|
| prl_TENOVIMEB | −2.16  | 16     | 62.50            |
| prl_PEPADYGYF | −0.54  | 10     | 10.00            |
| prl_SENOGUNYJ | −0.24  | 10     | 40.00            |
| prl_LIBUDIVFP | −3.23  | 16     | 68.75            |
| prl_ZONIGYNUS | −0.24  | 9      | 33.33            |
| prl_WELUBEBEZ | −0.27  | 13     | 38.46            |
| prl_FATUVEDIV | 1.8    | 18     | 38.89            |
| prl_HAZUBYZYW | 0.76   | 8      | 62.50            |
| prl_MUJUBEZIH | −1.23  | 9      | 22.22            |
| prl_TEPADOWET | −4.23  | 30     | 26.67            |
| prl_TOTATYFYW | −1.18  | 7      | 28.57            |
| prl_KYSUWISEB | −0.16  | 9      | 44.44            |
| prl_GYNOFEJAT | −1.04  | 12     | 25.00            |
| prl_DYFEGOGYP | −2.45  | 13     | 46.15            |
| prl_NUFYNAZOK | −3.23  | 25     | 24.00            |
| prl_VAVYWYDIL | −1.11  | 14     | 28.57            |
| prl_BIKUVEBIM | −0.54  | 8      | 25.00            |
| prl_TANOMYDYZ | −0.15  | 8      | 37.50            |
| prl_JUPIFOZYG | 0.75   | 15     | 33.33            |

---

|               |       |    |       |
|---------------|-------|----|-------|
| prl_HOJYGADAS | −3.03 | 14 | 50.00 |
| prl_TAMAPADIB | 0.5   | 9  | 55.56 |
| prl_WUVIBOZAT | 1.76  | 15 | 33.33 |
| prl_FOWEVIKYG | 0.76  | 9  | 22.22 |
| prl_BIGILIHEN | −0.24 | 17 | 23.53 |
| prl_MEKYLEPEN | −3.11 | 14 | 42.86 |
| prl_MAGYBUPYH | 0.73  | 9  | 55.56 |
| prl_SOLETYTAG | −2.24 | 9  | 33.33 |
| prl_PYBASYBOG | −0.15 | 9  | 44.44 |
| prl_PYPUKOVIN | 2.79  | 11 | 27.27 |
| prl_FUFUZUKYS | 0.79  | 7  | 42.86 |
| prl_TOLYSONEH | −0.15 | 18 | 50.00 |
| prl_HEDEDUJYJ | −0.24 | 9  | 88.89 |
| prl_VEKUHYJAV | 0.76  | 8  | 62.50 |
| prl_DIPAPEFYN | −1.24 | 11 | 27.27 |
| prl_DYVOVULAT | −0.15 | 14 | 35.71 |
| prl_BOHUPEZAM | −0.26 | 11 | 27.27 |
| prl_PIGOTOHIF | −1.15 | 9  | 55.56 |
| prl_GYWIFYKUG | −0.15 | 18 | 27.78 |
| prl_DOTOZOMUS | −2.24 | 19 | 36.84 |
| prl_SUHEPEFUF | −0.24 | 10 | 60.00 |
| prl_VYPYTENAW | −2.24 | 7  | 57.14 |
| prl_WOFYZENEZ | 0.8   | 9  | 88.89 |
| prl_ZESIHIWOS | −1.24 | 9  | 55.56 |
| prl_LONOLAJYG | −0.15 | 12 | 50.00 |
| prl_PYFYBAJIV | −1.2  | 9  | 44.44 |
| prl_DEPABEDOH | 0.76  | 9  | 44.44 |
| prl_POBEDEZYV | −0.24 | 10 | 10.00 |
| prl_BOGYNEHUL | −1.26 | 7  | 71.43 |
| prl_NYFAWIBOT | −1.24 | 8  | 37.50 |
| prl_BUBIDATOJ | −2.15 | 16 | 12.50 |
| prl_ZETIFIKYS | −0.24 | 14 | 42.86 |
| prl_VAFEDUHYM | −1.26 | 18 | 27.78 |
| prl_VELIWIVUV | −2.17 | 8  | 37.50 |
| prl_PYBISUHUM | −2.15 | 10 | 50.00 |
| prl_BYBIFUSAZ | 0.76  | 18 | 27.78 |
| prl_TYSIVYFIT | 0.05  | 7  | 14.29 |
| prl_SOPOVYLOH | −2.44 | 15 | 20.00 |
| prl_MIGIHYSAM | −0.15 | 7  | 57.14 |
| prl_VYSOBYFUN | 1.05  | 10 | 40.00 |
| prl_FIDUVOBOG | −1.6  | 8  | 25.00 |
| prl_SULUPEWON | 0.76  | 16 | 31.25 |
| prl_DIVYZEMON | 0.94  | 9  | 44.44 |
| prl_LODUSUWUJ | −1.16 | 10 | 40.00 |
| prl_MYKYTAWAP | 1.76  | 21 | 47.62 |
| prl_KYFYGEDAB | −0.26 | 14 | 50.00 |
| prl_ZUDYDEWAF | −0.21 | 7  | 14.29 |
| prl_NUPOJEGID | −1.24 | 9  | 44.44 |
| prl_PAMIPOSUG | −3.26 | 16 | 62.50 |
| prl_LEPIFAPUM | −0.54 | 14 | 50.00 |
| prl_WEKEZAVAZ | −0.24 | 9  | 55.56 |

---

---

|               |       |    |       |
|---------------|-------|----|-------|
| prl_MASOMEKEJ | 0.73  | 7  | 57.14 |
| prl_FEFEHEGUB | -2.6  | 21 | 14.29 |
| prl_LINAVADUS | -0.2  | 15 | 46.67 |
| prl_TOWIKYZIF | -1.24 | 8  | 50.00 |
| prl_JINEZIZYH | -1.26 | 16 | 68.75 |
| prl_SIMAZEGIT | -2.15 | 17 | 52.94 |
| prl_BIZILATIN | -1.24 | 8  | 25.00 |
| prl_HUBYVOKAP | 0.76  | 7  | 57.14 |
| prl_GUGANINUZ | -1.23 | 8  | 37.50 |
| prl_DIJEZOSOP | 0.73  | 20 | 50.00 |
| prl_SESINAJIM | -2.14 | 17 | 52.94 |
| prl_PIHEDOTUJ | -2.11 | 11 | 54.55 |
| prl_MOWOFUFEZ | -0.15 | 10 | 40.00 |
| prl_VEGUPOTED | -0.2  | 8  | 50.00 |
| prl_BIWEPKOS  | -0.15 | 11 | 63.64 |
| prl_JUPUPIMOW | -1.51 | 9  | 22.22 |
| prl_BYVUJOGEF | 0.76  | 7  | 42.86 |
| prl_TIVALYFED | -0.15 | 11 | 36.36 |
| prl_HOSYMUBEW | -0.24 | 10 | 20.00 |
| prl_VUWAPASAZ | -1.24 | 10 | 50.00 |
| prl_HOPEKONAF | -2.24 | 13 | 30.77 |
| prl_TEVANAGAM | -0.15 | 11 | 45.45 |
| prl_TUJANEKIF | -2.24 | 15 | 20.00 |
| prl_SOHUWUJYW | 0.76  | 10 | 80.00 |
| prl_PILISOBAG | -1.6  | 12 | 16.67 |
| prl_NIKYSUGOT | 0.4   | 9  | 55.56 |
| prl_GIHAGUZUM | -0.24 | 9  | 44.44 |
| prl_WUTAMEBEN | -0.2  | 11 | 63.64 |
| prl_JIDIKADUP | -0.54 | 11 | 9.09  |
| prl_ZEMUKYHUM | -1.24 | 10 | 10.00 |
| prl_TUJETUFYP | 0.76  | 8  | 50.00 |
| prl_WILYLASIT | 0.8   | 7  | 42.86 |
| prl_GOTANYZYT | -1.16 | 11 | 36.36 |
| prl_WONOLAWOJ | -0.54 | 8  | 37.50 |
| prl_LETIWYKUP | -0.54 | 12 | 50.00 |
| prl_PAJILAWUG | -2.24 | 9  | 0.00  |
| prl_SILOPYBAL | -1.23 | 8  | 25.00 |
| prl_JEPUHEWUH | -2.18 | 15 | 60.00 |
| prl_HUZYUZJEK | -3.15 | 8  | 12.50 |
| prl_SIWATEZEM | -0.24 | 10 | 30.00 |
| prl_TESOBIZEH | -6.15 | 36 | 27.78 |
| prl_SAJUWODOJ | 0.76  | 12 | 33.33 |
| prl_WATAGINOL | -0.15 | 13 | 38.46 |
| prl_HIZEPYTUS | -1.15 | 18 | 33.33 |
| prl_HIMYFAFIM | 1.76  | 14 | 21.43 |
| prl_TOZEHOWOF | -0.15 | 9  | 44.44 |
| prl_MYDEPUNAP | 0.79  | 8  | 37.50 |
| prl_MOLYWAWYT | -0.26 | 12 | 58.33 |
| prl_VAHUKAVIT | -2.53 | 8  | 37.50 |
| prl_TAFELYNAD | 0.76  | 9  | 55.56 |
| prl_VAGAWOTIH | -0.24 | 18 | 22.22 |

---

---

|                 |       |    |       |
|-----------------|-------|----|-------|
| prl_ZYPYTEKEK   | 0.76  | 12 | 50.00 |
| prl_SIZUWALUL   | 1.79  | 8  | 37.50 |
| prl_JATUKUBEF   | -0.24 | 7  | 57.14 |
| prl_TOVONIMAK   | 0.76  | 17 | 23.53 |
| prl_GAMIKAWEH   | -2.44 | 12 | 58.33 |
| prl_MIFOHEKUM   | -1.23 | 11 | 9.09  |
| prl_DEZUSYFID   | -0.15 | 8  | 50.00 |
| prl_MOWUDUFYV   | -3.51 | 12 | 33.33 |
| prl_JUNIMIWEG   | 0.76  | 9  | 11.11 |
| prl_PIKOFISES   | -0.24 | 10 | 30.00 |
| prl_HYGYVATUW   | -0.6  | 9  | 44.44 |
| prl_ZIGUWOSEV   | -0.24 | 10 | 60.00 |
| prl_SADEWUVOW   | -0.15 | 11 | 45.45 |
| prl_NABIFAKIZ   | -0.26 | 11 | 54.55 |
| prl_NUVOBYDUH   | -3.23 | 11 | 18.18 |
| prl_DIKAZUHYK   | -0.15 | 16 | 62.50 |
| prl_SAJIGADEG   | -0.18 | 10 | 80.00 |
| prl_KAKUPOGAD   | -1.18 | 13 | 23.08 |
| prl_DYPEJUZOP   | -0.54 | 14 | 57.14 |
| prl_WEZUHAVOW   | -0.27 | 9  | 55.56 |
| prl_TEMINEJES   | -1.53 | 13 | 23.08 |
| prl_LOZOHAVUL   | 0.76  | 11 | 36.36 |
| prl_NAGYTOGOT   | -0.24 | 13 | 23.08 |
| prl_WYLYFUGYP   | 0.73  | 10 | 30.00 |
| prl_MOFIKYLUL   | -1.11 | 8  | 50.00 |
| prl_MYPYLITAZ   | -1.24 | 7  | 71.43 |
| prl_NILANEKAL   | -1.15 | 10 | 40.00 |
| prl_NIJUMAWIH   | -1.26 | 11 | 45.45 |
| prl_ZYSIDYZUT   | 1.79  | 13 | 23.08 |
| prl_KEFOGYKYB   | -0.2  | 8  | 75.00 |
| prl_MYJOKYPOT   | 0.85  | 8  | 50.00 |
| prl_GALAWIWIH   | -2.24 | 9  | 55.56 |
| prl_SITAFUMES   | -1.24 | 12 | 50.00 |
| prl_BIGUKAKEW   | -1.23 | 13 | 15.38 |
| prl_TIGATYHUV   | 0.46  | 9  | 33.33 |
| prl_KESIHETYZ   | -2.24 | 9  | 55.56 |
| prl_SOSOSIZEK   | -3.07 | 13 | 46.15 |
| prl_VOVEKOBYG   | -1.26 | 9  | 44.44 |
| prl_JYWYKABET   | -0.16 | 10 | 20.00 |
| prl_BYPOFOVOK   | -0.26 | 10 | 60.00 |
| prl_FETABINUL   | -1.18 | 12 | 33.33 |
| prl_SOGABIGYH   | 0.46  | 7  | 42.86 |
| prl_WAZYFYFYSOL | -1.2  | 7  | 57.14 |
| prl_GIZUWODAT   | -2.16 | 8  | 37.50 |
| prl_FAHOFYTYV   | 1.76  | 15 | 60.00 |
| prl_LOGEVEJID   | -0.17 | 7  | 28.57 |
| prl_WOLIHYPAN   | -1.11 | 9  | 66.67 |
| prl_KIKAWITON   | -2.15 | 15 | 60.00 |
| prl_SIVOSOWUF   | -1.24 | 12 | 33.33 |
| prl_TUGEBIKOZ   | -2.23 | 15 | 53.33 |
| prl_SALOVYBYJ   | 0.76  | 7  | 85.71 |

---

---

|               |       |    |       |
|---------------|-------|----|-------|
| prl_GUHITAVAF | −0.04 | 8  | 50.00 |
| prl_VOJOZALIL | −0.24 | 7  | 42.86 |
| prl_NIKAFOGYS | −1.45 | 14 | 21.43 |
| prl_NANOTEMUW | 0.76  | 11 | 18.18 |
| prl_TEHOBUZEL | −0.26 | 7  | 57.14 |
| prl_DEDYGUKOL | −0.24 | 7  | 14.29 |
| prl_JOKOTOSYF | 0.76  | 8  | 62.50 |
| prl_JUNAWEKUD | −1.16 | 17 | 23.53 |
| prl_NYMYWADUS | −2.53 | 17 | 41.18 |
| prl_FAKULEMYZ | −1.16 | 13 | 30.77 |
| prl_KYDOHYSIH | −0.24 | 8  | 62.50 |
| prl_WUGISAZUN | −0.24 | 12 | 50.00 |
| prl_BYGOWADAL | −1.53 | 8  | 37.50 |
| prl_WASOKIMIM | −3.25 | 23 | 30.43 |
| prl_PUGAWIDID | −1.6  | 15 | 73.33 |
| prl_TULUBYVIT | −1.53 | 11 | 36.36 |
| prl_NASUFOTOT | −3.14 | 23 | 17.39 |
| prl_LUFALOMOT | −0.2  | 9  | 55.56 |
| prl_NESUNYDYW | −0.27 | 7  | 57.14 |
| prl_LINETUWOT | −0.27 | 8  | 62.50 |
| prl_VUJYDEVYP | −0.24 | 7  | 0.00  |
| prl_BATEZUDYW | 1.79  | 20 | 50.00 |
| prl_NITUMAGAZ | −0.24 | 10 | 40.00 |
| prl_VEMIJOGET | −0.24 | 7  | 57.14 |
| prl_FIDOZIJAF | 0.76  | 16 | 25.00 |
| prl_NOLIPBEH  | −0.15 | 25 | 32.00 |
| prl_FYBUZIWOJ | −1.2  | 9  | 66.67 |
| prl_PIMASOFON | −2.08 | 13 | 15.38 |
| prl_BIDADAWEN | 0.74  | 15 | 46.67 |
| prl_DOZALYJAT | −2.26 | 7  | 42.86 |
| prl_MUVOJAVOM | −1.26 | 19 | 36.84 |
| prl_FAVUHUFOW | −1.24 | 7  | 71.43 |
| prl_WAJYVEGAT | 1.76  | 19 | 42.11 |
| prl_VIWIBEGOZ | −0.24 | 14 | 28.57 |
| prl_VYGILUPYG | −0.15 | 21 | 23.81 |
| prl_FYFOZIDAJ | −0.25 | 14 | 35.71 |
| prl_NUJENEVIS | −1.2  | 9  | 66.67 |
| prl_BIKYGUKIB | −2.24 | 15 | 26.67 |
| prl_ZOFUVUBUT | −1.26 | 17 | 29.41 |
| prl_WUKIDANIW | −2.04 | 17 | 29.41 |
| prl_BYBIGAVYF | −0.15 | 15 | 53.33 |
| prl_VEDAZAVIM | −1.26 | 10 | 40.00 |
| prl_HITUBIKYT | −0.24 | 9  | 22.22 |
| prl_WILABAWEH | −1.21 | 10 | 20.00 |
| prl_KEZINYDEM | −1.24 | 10 | 60.00 |
| prl_MEWULOFYP | −1.26 | 15 | 33.33 |
| prl_HIDITUSAB | −2.24 | 7  | 42.86 |
| prl_NONIBYNIG | −1.23 | 9  | 33.33 |
| prl_DYVAVUFOW | −0.24 | 8  | 62.50 |
| prl_VUTEMYHUG | 0.82  | 11 | 36.36 |
| prl_NONUMAWEV | −2.26 | 12 | 41.67 |

---

---

|               |       |    |       |
|---------------|-------|----|-------|
| prl_PADOBABAW | -1.24 | 11 | 27.27 |
| prl_JYHATEDUV | -1.24 | 7  | 42.86 |
| prl_FIZASUVEH | -0.6  | 7  | 42.86 |
| prl_MYZAJEKIS | -0.5  | 9  | 55.56 |
| prl_PUBUPYWOH | -0.16 | 7  | 14.29 |
| prl_POFYHOSUZ | -2.26 | 14 | 35.71 |
| prl_GYBIKUJYW | -2.23 | 7  | 42.86 |
| prl_FONAFYMIF | -0.24 | 11 | 36.36 |
| prl_MUZOHAEHF | -3.53 | 14 | 35.71 |
| prl_FOVIVYLYB | -0.27 | 10 | 70.00 |
| prl_GEBYFIKIJ | 0.76  | 8  | 50.00 |
| prl_DEFIWAKAH | -0.24 | 13 | 46.15 |
| prl_FYJEGYHOL | -1.24 | 16 | 31.25 |
| prl_VIMYNELYN | -0.24 | 8  | 37.50 |
| prl_NOTENAHUF | -1.03 | 18 | 22.22 |
| prl_TAFUWOTOV | -0.2  | 15 | 46.67 |
| prl_MEPIVIJUV | 0.76  | 8  | 50.00 |
| prl_MESULADOS | 0.76  | 7  | 42.86 |
| prl_JOMYJATYD | -0.24 | 10 | 60.00 |
| prl_WOMUTEKOG | 0.46  | 12 | 41.67 |
| prl_PABYJOKEZ | -1.24 | 7  | 28.57 |
| prl_FAHIFILIM | -0.24 | 9  | 33.33 |
| prl_NUJUSIPUS | -1.2  | 7  | 57.14 |
| prl_GETISYNAB | 0.8   | 15 | 53.33 |
| prl_MYMIZYDAK | -1.24 | 7  | 14.29 |
| prl_DIWEZAJAK | -0.24 | 7  | 42.86 |
| prl_BYSYGUBOM | -0.24 | 7  | 14.29 |
| prl_TOPAZYGIK | -1.26 | 16 | 62.50 |
| prl_BOJIDUHAL | 0.76  | 9  | 22.22 |
| prl_VEHUZIJOK | -1.24 | 13 | 53.85 |
| prl_KOHELYHEV | -0.24 | 7  | 28.57 |
| prl_VYTAMOGYJ | -1.26 | 7  | 57.14 |
| prl_VAPYLOTAN | -1.06 | 14 | 64.29 |
| prl_PAWIMYHUW | -0.24 | 10 | 50.00 |
| prl_BYTYBADED | -3.14 | 21 | 14.29 |
| prl_DEFOGOBEG | -2.17 | 10 | 40.00 |
| prl_GYGEGEZUT | -2.24 | 12 | 50.00 |
| prl_NATOLYWIB | -1.53 | 8  | 62.50 |
| prl_GYBEBUHET | 0.76  | 9  | 44.44 |
| prl_FUJYMUNIS | -0.24 | 9  | 33.33 |
| prl_ZAMAJEKYH | -1.26 | 10 | 70.00 |
| prl_PAFEKADED | 0.76  | 11 | 63.64 |
| prl_LIDAFONUB | 1.76  | 12 | 25.00 |
| prl_HILIDUPUD | -1.24 | 8  | 75.00 |
| prl_VEDOJYDYN | -0.24 | 11 | 45.45 |
| prl_MEMOFEMEG | 0.46  | 12 | 41.67 |
| prl_JOVONOWED | -1.16 | 9  | 22.22 |
| prl_ZONATEDAP | -1.24 | 10 | 40.00 |
| prl_ZYDUJULIF | -1.24 | 8  | 37.50 |
| prl_TANEVIGYK | 0.76  | 8  | 50.00 |
| prl_ZUJOKYLYD | 0.76  | 7  | 42.86 |

---

---

|               |       |    |       |
|---------------|-------|----|-------|
| prl_BONIGOVAS | −2.6  | 7  | 28.57 |
| prl_WALELEFYF | −6.53 | 38 | 26.32 |
| prl_POTETIJES | 0.76  | 7  | 42.86 |
| prl_ZEJUKIFIZ | −0.24 | 10 | 50.00 |
| prl_JITUWEBEK | −0.54 | 8  | 50.00 |
| prl_NYHIJUVIJ | −1.26 | 15 | 26.67 |
| prl_SYPELIKIS | 0.76  | 10 | 50.00 |
| prl_HUJIJOTOB | −0.53 | 10 | 30.00 |
| prl_FYFAZAPAF | −2.24 | 17 | 23.53 |
| prl_ZOBEHIKUL | −1.24 | 7  | 28.57 |
| prl_ZIWOJUTOH | −0.24 | 16 | 37.50 |
| prl_ZEWOJUZOM | 0.76  | 8  | 25.00 |
| prl_NEJUPUBON | 0.4   | 11 | 45.45 |
| prl_WENALYKAB | 0.76  | 14 | 42.86 |
| prl_TUDOPYJOH | −1.6  | 8  | 25.00 |
| prl_DOVOZYTUB | 0.8   | 19 | 63.16 |
| prl_TEFEKITAL | −1.15 | 9  | 55.56 |
| prl_WUDUTYFAD | −1.5  | 7  | 42.86 |
| prl_PANULUFIT | −1.18 | 7  | 42.86 |
| prl_LUJAHAFUP | −0.21 | 7  | 28.57 |
| prl_FAPEGUDOJ | −3.04 | 11 | 63.64 |
| prl_NYBYGAVYF | −2.14 | 8  | 50.00 |
| prl_NYGUFANOZ | −0.24 | 13 | 38.46 |
| prl_NYJILEWUV | −6.53 | 39 | 25.64 |
| prl_PAGILIWYL | −0.15 | 11 | 27.27 |
| prl_BEWODODET | 0.76  | 12 | 83.33 |
| prl_SATUDAMET | −0.24 | 10 | 60.00 |
| prl_WAJIJUWYZ | −0.15 | 16 | 62.50 |
| prl_LULIMYBIF | −1.15 | 8  | 62.50 |
| prl_TOFYWAZYB | −1.26 | 11 | 45.45 |
| prl_BILULEDEZ | −2.11 | 10 | 50.00 |
| prl_GAJAMILEV | −0.24 | 12 | 33.33 |
| prl_ZOSAVOHUD | −0.24 | 10 | 40.00 |
| prl_HAGYFYBAM | −1.15 | 13 | 69.23 |
| prl_VIMEPUBON | −2.11 | 10 | 50.00 |
| prl_VYDUTIBIK | −1.23 | 9  | 66.67 |
| prl_SAMYNKYV  | 0.79  | 16 | 25.00 |
| prl_PAGUSOBAM | −2.23 | 12 | 33.33 |
| prl_FEZEGAMOM | 0.79  | 7  | 28.57 |
| prl_PAWYHABYH | −0.27 | 8  | 75.00 |
| prl_FOSIVEHEZ | −0.27 | 12 | 41.67 |
| prl_WYBITIDIZ | 0.76  | 13 | 46.15 |
| prl_MIHUVEBAP | 0.76  | 11 | 63.64 |
| prl_LUGYWUDOD | −0.24 | 11 | 54.55 |
| prl_BILEWAFEM | 1.04  | 15 | 46.67 |
| prl_MAMILOGUN | 0.76  | 8  | 50.00 |
| prl_SYDATELEF | −1.18 | 16 | 25.00 |
| prl_SUTEPEKIH | −3.53 | 16 | 31.25 |
| prl_WEWAMYSES | −1.2  | 15 | 20.00 |
| prl_NOGABOKOD | −0.15 | 15 | 53.33 |
| prl_LISIDAMIB | −0.15 | 15 | 53.33 |

---



---

|               |       |    |       |
|---------------|-------|----|-------|
| prl_TUNIHIZOB | -1.16 | 9  | 44.44 |
| prl_HOWEMYWAD | -2.26 | 11 | 63.64 |
| prl_DYLOKISUT | -1.15 | 9  | 55.56 |
| prl_GAKOKINUT | -1.24 | 14 | 35.71 |
| prl_LATASYFIT | -1.25 | 12 | 41.67 |
| prl_ZUKIFOWOG | -0.15 | 12 | 33.33 |
| prl_HYVUFYJYB | -0.24 | 7  | 28.57 |
| prl_NUNYTEVOT | -1.24 | 18 | 50.00 |
| prl_FOBONIMAP | -0.24 | 7  | 42.86 |
| prl_ZOFINALEB | 0.85  | 16 | 43.75 |
| prl_GIKEGOWOP | -1.2  | 10 | 60.00 |
| prl_VYTULAJIN | -2.24 | 17 | 35.29 |
| prl_NEMAFYWIM | -1.14 | 21 | 19.05 |
| prl_WANOBIBIH | 0.76  | 19 | 42.11 |
| prl_KELODAVAJ | 0.73  | 10 | 60.00 |
| prl_ZYLEPYPUB | -1.23 | 23 | 30.43 |
| prl_DUPUWUHUV | -0.24 | 16 | 43.75 |
| prl_HASYZENOH | -1.15 | 14 | 35.71 |
| prl_HENATIZEH | -1.24 | 13 | 30.77 |
| prl_WAVUJYDYZ | -1.16 | 13 | 23.08 |
| prl_SUJAZOZEB | -1.04 | 7  | 57.14 |
| prl_NODUPANIJ | -0.24 | 9  | 55.56 |
| prl_HYZYJUSIH | -1.24 | 12 | 75.00 |
| prl_TAGYPEZIJ | -1.07 | 16 | 31.25 |
| prl_JODOTEBYG | 0.4   | 11 | 45.45 |
| prl_NABYMOJAM | -0.5  | 12 | 50.00 |
| prl_BUVOBYLUF | -1.24 | 7  | 85.71 |
| prl_WUFASYVED | -2.54 | 8  | 37.50 |
| prl_WYLETOBUM | 0.85  | 13 | 38.46 |
| prl_JIHEFABYD | -2.15 | 13 | 61.54 |
| prl_DUMOJADAP | 0.05  | 12 | 58.33 |
| prl_BUKYGOVIW | -3.23 | 13 | 46.15 |
| prl_NIBALIDIP | -1.15 | 11 | 72.73 |
| prl_LUDYJAVAS | 0.76  | 10 | 50.00 |
| prl_NAMUFIMIL | -0.15 | 13 | 23.08 |
| prl_PAHAMODOZ | 0.4   | 7  | 14.29 |
| prl_PUHILYDUB | 0.5   | 8  | 62.50 |
| prl_BOZEHAVOJ | -0.54 | 14 | 50.00 |
| prl_FEKIVAPUN | -0.04 | 12 | 16.67 |
| prl_JILIVYJYW | -0.24 | 8  | 62.50 |
| prl_HEGYZOSUN | -0.24 | 15 | 46.67 |
| prl_PYKANUHUZ | 0.76  | 12 | 50.00 |
| prl_NEGUVEZON | -0.21 | 11 | 27.27 |
| prl_KEKYHODAW | -1.23 | 8  | 62.50 |
| prl_JITYMAVOH | -1.15 | 9  | 66.67 |
| prl_SABIKYZET | -2.2  | 8  | 37.50 |
| prl_JYMPENOV  | -1.26 | 10 | 40.00 |
| prl_MAZANUTAS | -0.24 | 17 | 17.65 |
| prl_NUDODYPOW | -1.15 | 12 | 75.00 |
| prl_FISISOSOS | -1.26 | 8  | 37.50 |
| prl_FOTUDODUH | -4.53 | 27 | 25.93 |

---

---

|               |       |    |       |
|---------------|-------|----|-------|
| prl_MENOKIZIF | -3.23 | 14 | 35.71 |
| prl_JAKEHADUN | -0.2  | 9  | 33.33 |
| prl_JUPITEKIS | -0.15 | 8  | 37.50 |
| prl_NOGETEGUZ | -1.24 | 9  | 44.44 |
| prl_NAPOKYSAW | -2.04 | 8  | 50.00 |
| prl_MYJAZISOZ | -0.54 | 8  | 37.50 |
| prl_WIDSELUV  | -2.26 | 8  | 37.50 |
| prl_BAGIGIPEG | 1.05  | 11 | 18.18 |
| prl_KAZIJOSUW | -2.24 | 10 | 30.00 |
| prl_GUZYMIJOW | -2.24 | 22 | 45.45 |
| prl_TUBOWYJEF | -1.24 | 19 | 31.58 |
| prl_KISUNABYV | 0.76  | 8  | 50.00 |
| prl_TESYVUKEK | 0.76  | 8  | 25.00 |
| prl_TYDOJAHEG | -1.23 | 8  | 25.00 |
| prl_VOSASIFIL | 0.4   | 14 | 28.57 |
| prl_GALAWOFUS | -1.16 | 15 | 13.33 |
| prl_HUKODEDUF | -2.24 | 11 | 45.45 |
| prl_SEKOMYWEV | -1.23 | 24 | 33.33 |
| prl_TYBYDIGEN | -0.15 | 11 | 45.45 |
| prl_MOFEJILIW | -0.24 | 14 | 21.43 |
| prl_KAFUZIDIL | -0.24 | 7  | 28.57 |
| prl_HIHEZELOT | -0.15 | 8  | 50.00 |
| prl_TOWOKULOZ | -0.03 | 12 | 50.00 |
| prl_SYVIJYDIL | 0.76  | 11 | 63.64 |
| prl_DAHAGAPYV | -0.16 | 7  | 28.57 |
| prl_VYTYVUTYN | -2.14 | 8  | 37.50 |
| prl_VAHYBEKAG | -3.23 | 8  | 25.00 |
| prl_JUGEJELAZ | 1.8   | 18 | 38.89 |
| prl_GEFYTUKAZ | -1.15 | 14 | 21.43 |
| prl_TUNEKOVAV | -2.15 | 13 | 46.15 |
| prl_HIKOKADAM | -0.24 | 7  | 28.57 |
| prl_PUTATAHEM | -0.15 | 7  | 57.14 |
| prl_TAWIZIMOH | -0.27 | 12 | 41.67 |
| prl_WIVOVEJOS | 0.96  | 13 | 38.46 |
| prl_FUBOKOBEM | 0.55  | 10 | 20.00 |
| prl_FAMUNETET | -0.6  | 8  | 50.00 |
| prl_NABIMOJOJ | -2.19 | 15 | 60.00 |
| prl_GUBESYLIZ | -1.26 | 13 | 46.15 |
| prl_SEGUFEDYZ | -2.08 | 10 | 20.00 |
| prl_LAPUSIGAF | 0.46  | 10 | 40.00 |
| prl_VEFALONIF | -0.24 | 9  | 44.44 |
| prl_SOVYBILEM | -2.24 | 13 | 46.15 |
| prl_NONALIZAN | -0.24 | 8  | 50.00 |
| prl_VYVUTITOW | -0.24 | 14 | 57.14 |
| prl_LOFAHYFIN | -0.24 | 9  | 55.56 |
| prl_FENAVESAL | -2.53 | 9  | 55.56 |
| prl_SASYBAVOM | -0.15 | 9  | 33.33 |
| prl_FADAPIJAP | 0.73  | 7  | 28.57 |
| prl_SINOKUSYH | -2.23 | 10 | 60.00 |
| prl_JYPYKOSUD | 1.76  | 16 | 25.00 |
| prl_GASEFAJAW | -2.54 | 9  | 22.22 |

---

---

|               |       |    |       |
|---------------|-------|----|-------|
| prl_KATANUFUB | 0.76  | 15 | 40.00 |
| prl_HAWEKASAT | −0.24 | 7  | 71.43 |
| prl_TYDUWYSYD | −0.15 | 14 | 21.43 |
| prl_FAFOVEJYG | −0.24 | 11 | 36.36 |
| prl_TUPOKYWYW | −2.26 | 15 | 46.67 |
| prl_SEKEVASIF | −0.26 | 7  | 57.14 |
| prl_KYHAKOHAH | −0.04 | 11 | 36.36 |
| prl_HEFETYVIV | 0.76  | 13 | 38.46 |
| prl_VYJYPYZUH | −0.27 | 11 | 45.45 |
| prl_PUFYZYLAK | 1.4   | 10 | 30.00 |
| prl_JOZUZYVEW | −1.24 | 7  | 85.71 |
| prl_JIWODOHIV | −0.24 | 10 | 60.00 |
| prl_SEJIHOTOK | −2.23 | 9  | 22.22 |
| prl_JITUVOLEJ | −0.24 | 15 | 26.67 |
| prl_BEDAGYJYH | −1.18 | 7  | 57.14 |
| prl_KYZAMAFUW | 0.02  | 8  | 25.00 |
| prl_BOBEJUNYW | 0.4   | 12 | 58.33 |
| prl_DIMOLIDAJ | −0.27 | 7  | 71.43 |
| prl_BILAZUPIB | 0.46  | 11 | 45.45 |
| prl_MIGAFONOG | −2.23 | 10 | 30.00 |
| prl_HIHUNITIT | −2.16 | 8  | 75.00 |
| prl_KUSOMYHEG | 0.76  | 9  | 44.44 |
| prl_TIPIGIKEJ | −1.24 | 12 | 50.00 |
| prl_NIPUJYJUL | −0.15 | 9  | 55.56 |
| prl_BEFYFIFUJ | −0.18 | 11 | 63.64 |
| prl_JEWAKEVOM | −0.24 | 11 | 45.45 |
| prl_WAJODENEG | 0.76  | 9  | 33.33 |
| prl_JODUNOLOT | −0.15 | 14 | 50.00 |
| prl_TYZUMUWUB | −0.27 | 7  | 57.14 |
| prl_VAJYBEPYK | −0.24 | 8  | 75.00 |
| prl_HAVULYZAW | −0.54 | 10 | 40.00 |
| prl_FAJUWEDAJ | 0.73  | 10 | 50.00 |
| prl_POLIJUPID | −1.23 | 11 | 27.27 |
| prl_LIPAPAFEB | 0.73  | 20 | 45.00 |
| prl_PYJUPULEP | 0.8   | 21 | 61.90 |
| prl_MIBOMEDAL | −2.23 | 12 | 16.67 |
| prl_JEVIKEDUS | −1.24 | 9  | 33.33 |
| prl_ZYSIVELOS | 0.76  | 9  | 55.56 |
| prl_VADABOKIP | 0.82  | 9  | 22.22 |
| prl_SOJOKIWEW | −1.24 | 15 | 26.67 |
| prl_LUMUHUPYJ | −0.18 | 8  | 37.50 |
| prl_FITAZYHOT | 1.76  | 11 | 63.64 |
| prl_JEFEWOWAM | 0.76  | 13 | 53.85 |
| prl_GUWYHUMES | −1.24 | 8  | 87.50 |
| prl_ZANEHYWYD | −0.15 | 27 | 37.04 |
| prl_BILETUMUM | −0.24 | 8  | 37.50 |
| prl_KADILUGET | −3.53 | 18 | 27.78 |
| prl_LEPAKOMUD | −0.54 | 8  | 37.50 |
| prl_ZOHOJEBUZ | 0.76  | 15 | 33.33 |
| prl_KABILATYN | −2.16 | 12 | 50.00 |
| prl_KYGYMIVYB | 0.76  | 10 | 30.00 |

---

---

|               |       |    |       |
|---------------|-------|----|-------|
| prl_PYTILYDYL | -1.45 | 13 | 38.46 |
| prl_LYDIGUMUD | -2.24 | 8  | 37.50 |
| prl_SIBOSAKYN | 0.76  | 9  | 33.33 |
| prl_GEGUTYJUD | -0.23 | 12 | 25.00 |
| prl_GIBINEGON | -1.24 | 10 | 10.00 |
| prl_FIPILIFUB | -3.19 | 15 | 60.00 |
| prl_NIWAVIDIZ | -0.24 | 13 | 61.54 |
| prl_WUWUDEVOD | -0.16 | 11 | 36.36 |
| prl_SYKUWULID | -0.21 | 7  | 57.14 |
| prl_FABAMIMYZ | -0.15 | 14 | 50.00 |
| prl_VATEWYHUW | -0.6  | 8  | 75.00 |
| prl_FEGIKIBAS | -0.24 | 13 | 30.77 |
| prl_LYVEDAJEK | 0.76  | 11 | 36.36 |
| prl_GEFIHAGYM | -2.14 | 7  | 28.57 |
| prl_SEMEBYPUT | -3.11 | 12 | 25.00 |
| prl_HIDELYSUM | 0.76  | 15 | 33.33 |
| prl_LAHOGOZUM | -1.26 | 10 | 20.00 |
| prl_NUGAPUSUJ | -0.24 | 13 | 61.54 |
| prl_GYZOLUTEH | -1.23 | 8  | 75.00 |
| prl_ZOHUNIKAS | 0.76  | 7  | 28.57 |
| prl_VEZYZOMOP | -0.15 | 14 | 21.43 |
| prl_KOFAGOMIK | -0.23 | 13 | 46.15 |
| prl_DAGAFIBYL | 0.76  | 10 | 50.00 |
| prl_VUNOWANIZ | 0.4   | 9  | 44.44 |
| prl_ZATOMAKEN | -1.24 | 10 | 50.00 |
| prl_VOKESEBAK | 0.76  | 9  | 66.67 |
| prl_ZEFYLEHAK | -0.54 | 8  | 37.50 |
| prl_DOKYHASYW | -0.26 | 11 | 54.55 |
| prl_TINUSEVEB | -4.23 | 18 | 11.11 |
| prl_MEVEFUHOP | 0.76  | 7  | 14.29 |
| prl_JEWIVYNOK | -1.24 | 17 | 52.94 |
| prl_GONIVYLES | -0.04 | 10 | 50.00 |
| prl_LUKYTYLUP | -2.23 | 12 | 50.00 |
| prl_KUPYZASAN | -0.24 | 11 | 36.36 |
| prl_JISADAFYW | -2.15 | 9  | 44.44 |
| prl_GUGUMEJYP | -1.24 | 9  | 55.56 |
| prl_JISILYNON | -0.24 | 10 | 30.00 |
| prl_VOBYTEMUW | 0.76  | 14 | 42.86 |
| prl_BILILOKYT | -1.16 | 9  | 44.44 |
| prl_ZUTUFAVUD | -0.15 | 13 | 46.15 |
| prl_PIGEBIHIB | -2.15 | 12 | 58.33 |
| prl_GYBOZEMYB | 0.55  | 11 | 36.36 |
| prl_HIZYBEHYK | -0.24 | 7  | 42.86 |
| prl_HEZIMULIH | -2.24 | 24 | 29.17 |
| prl_VONozILAK | 0.76  | 7  | 71.43 |
| prl_POBAFIPAW | 0.76  | 17 | 17.65 |
| prl_FOSIBAWET | -0.24 | 7  | 57.14 |
| prl_JAGIVIJES | -2.15 | 11 | 45.45 |
| prl_ZYLAGUMYH | -1.24 | 10 | 50.00 |
| prl_WASAWUSIF | -2.53 | 14 | 35.71 |
| prl_TOJEHAHUF | -1.15 | 11 | 63.64 |

---

---

|               |       |    |       |
|---------------|-------|----|-------|
| prl_ZUMAJUZIG | 0.76  | 12 | 50.00 |
| prl_KIHOJEJEH | 0.8   | 12 | 33.33 |
| prl_PILYMAZAG | 1.46  | 8  | 25.00 |
| prl_FIGENASIJ | -1.24 | 12 | 50.00 |
| prl_ZOKAMATOD | -1.15 | 9  | 55.56 |
| prl_SESIVULEZ | -1.24 | 10 | 50.00 |
| prl_DEGUKIDIN | -0.15 | 7  | 28.57 |
| prl_GIFAFOHYV | -2.15 | 11 | 18.18 |
| prl_BEZIJASIN | -1.26 | 9  | 66.67 |
| prl_VUBEDUMAJ | 0.76  | 8  | 50.00 |
| prl_PULOHAVAB | -0.16 | 8  | 50.00 |
| prl_HYWEMYMIH | -1.08 | 7  | 42.86 |
| prl_LIBIMOBAT | -1.23 | 8  | 50.00 |
| prl_MYFYSEFAL | -0.15 | 9  | 44.44 |
| prl_SUBOPUVYM | 0.73  | 8  | 62.50 |
| prl_WIDEJEMEP | -3.07 | 15 | 60.00 |
| prl_HIDULATOG | -0.24 | 9  | 22.22 |
| prl_TIMADUKUH | 2.76  | 20 | 25.00 |
| prl_JEFUMYHIN | 0.74  | 12 | 41.67 |
| prl_BUJUPYTIJ | -0.2  | 7  | 71.43 |
| prl_MAVYKUFAD | 0.76  | 9  | 44.44 |
| prl_LAMILYBAW | -0.15 | 16 | 50.00 |
| prl_HYTUMOFIK | 0.76  | 14 | 57.14 |
| prl_LUZOBIBEJ | -2.26 | 11 | 63.64 |
| prl_ZUVIKUNAP | 0.76  | 10 | 50.00 |
| prl_DUVEMUJEL | -1.24 | 9  | 44.44 |
| prl_DUVIHITOJ | -0.04 | 7  | 28.57 |
| prl_MUVIKOSUD | 0.76  | 14 | 28.57 |
| prl_GEPIJATOF | -2.17 | 14 | 64.29 |
| prl_MYKUVYKUT | -1.24 | 10 | 60.00 |
| prl_DUGEPIVAF | 0.73  | 11 | 54.55 |
| prl_FOKOJIHOJ | -0.24 | 10 | 50.00 |
| prl_BAZOPOMAN | -2.15 | 13 | 61.54 |
| prl_HYVETYHYV | -0.16 | 9  | 55.56 |
| prl_HYWALAPYP | 0.76  | 15 | 26.67 |
| prl_DAZUTEMAP | -2.23 | 10 | 40.00 |
| prl_FALOFUMYB | -0.24 | 15 | 40.00 |
| prl_WYMUGUTAS | -2.49 | 12 | 25.00 |
| prl_JEVIDEVYF | -2.07 | 11 | 54.55 |
| prl_JUHYHOWIF | -0.24 | 7  | 28.57 |
| prl_ZULUVOTUS | -2.26 | 16 | 37.50 |
| prl_DYFISEVAV | -1.24 | 10 | 60.00 |
| prl_BUVOFINIW | -0.24 | 8  | 12.50 |
| prl_ZISYMUVEN | 0.76  | 15 | 53.33 |
| prl_FUFOZINOZ | 0.73  | 11 | 45.45 |
| prl_SUHOWELEB | -1.06 | 16 | 62.50 |
| prl_PAJYLEFIW | -1.16 | 8  | 50.00 |
| prl_SOHASUTEW | -1.03 | 11 | 45.45 |
| prl_FAVEBIPYB | -0.12 | 13 | 53.85 |
| prl_JEGUDEWAV | -0.15 | 11 | 9.09  |
| prl_LUHAFEWIZ | -1.12 | 14 | 28.57 |

---

---

|               |       |    |       |
|---------------|-------|----|-------|
| prl_NOHYMYLYK | 0.76  | 14 | 42.86 |
| prl_DUZUSAGUV | −1.6  | 7  | 28.57 |
| prl_JYSOKELUW | −2.25 | 12 | 58.33 |
| prl_FUTODYVEB | 0.46  | 9  | 22.22 |
| prl_DOLIGIZEM | −1.53 | 12 | 58.33 |
| prl_TEKIDUJEH | 0.76  | 12 | 58.33 |
| prl_KYBAJEVIM | 0.76  | 12 | 50.00 |
| prl_BOBONAKEK | −2.24 | 8  | 62.50 |
| prl_MATYPABYF | 0.76  | 13 | 53.85 |
| prl_FADYLOFUZ | −1.23 | 12 | 25.00 |
| prl_POLAMIZEH | −0.15 | 12 | 58.33 |
| prl_TESOSAGOW | 0.76  | 7  | 28.57 |
| prl_LETELEDIF | 0.05  | 7  | 71.43 |
| prl_BUBYFIMYF | −0.54 | 15 | 46.67 |
| prl_LYFOLEKUM | −6.53 | 41 | 24.39 |
| prl_LEMOVIWUV | −1.16 | 9  | 55.56 |
| prl_FISIBEHIB | −0.26 | 13 | 61.54 |
| prl_FELYMIWUZ | −2.14 | 12 | 58.33 |
| prl_LUFAFYLAJ | −1.23 | 13 | 30.77 |
| prl_BIJOFYPAD | −1.16 | 13 | 30.77 |
| prl_MYDYWYSYS | −0.15 | 10 | 20.00 |
| prl_JIDUMAWYP | −2.07 | 8  | 50.00 |
| prl_HYPOTIKEM | −1.15 | 12 | 75.00 |
| prl_FAJANAGUK | 0.76  | 11 | 54.55 |
| prl_KIDINIDUM | −1.6  | 14 | 71.43 |
| prl_BUNEVIJYJ | 0.96  | 14 | 35.71 |
| prl_HOKULESUZ | 1.76  | 15 | 40.00 |
| prl_SYNANODAV | −1.15 | 11 | 18.18 |
| prl_WEPANIFOB | −0.2  | 8  | 75.00 |
| prl_SOLAGITEL | −0.5  | 15 | 53.33 |
| prl_JUWASADIP | −0.18 | 9  | 55.56 |
| prl_WITAJOZUT | −0.15 | 8  | 50.00 |
| prl_KAHIPYWYJ | −1.24 | 26 | 19.23 |
| prl_WIKYPAJOH | 0.76  | 13 | 38.46 |
| prl_VYBAZELAW | −0.15 | 8  | 50.00 |
| prl_LELOPAHIG | −0.24 | 8  | 50.00 |
| prl_NENYMYHAW | 0.74  | 10 | 20.00 |
| prl_FAWYDOFUM | −0.23 | 11 | 45.45 |
| prl_BAJYPULYG | 0.4   | 12 | 66.67 |
| prl_GEGUDABES | −4.07 | 10 | 10.00 |
| prl_HIBODIVYV | −0.24 | 7  | 14.29 |
| prl_TIWEFOPIL | −2.04 | 24 | 16.67 |
| prl_DINAHOFON | 0.05  | 11 | 45.45 |
| prl_LITUWASYD | −1.54 | 8  | 37.50 |
| prl_ZIHEWATIZ | 0.76  | 10 | 30.00 |
| prl_KOGEZUSUS | −1.15 | 12 | 58.33 |
| prl_VOGUKIHUK | −0.24 | 9  | 33.33 |
| prl_TELOLUWOG | −3.16 | 14 | 35.71 |
| prl_LENELOMYH | −0.24 | 8  | 50.00 |
| prl_HYNOTOFIW | −0.15 | 9  | 44.44 |
| prl_HUNYPYPAL | 0.76  | 7  | 71.43 |

---

---

|               |       |    |       |
|---------------|-------|----|-------|
| prl_WAKITYPAJ | 0.76  | 11 | 36.36 |
| prl_GYPYWUBOM | −0.24 | 8  | 75.00 |
| prl_MYNAWYMAS | −2.24 | 11 | 45.45 |
| prl_KIHIIJWEL | −1.24 | 7  | 57.14 |
| prl_ZOSYDOGIT | 0.76  | 8  | 37.50 |
| prl_FAPIJENYZ | −2.16 | 9  | 55.56 |
| prl_BIWAMAZYT | −0.24 | 14 | 78.57 |
| prl_TYTAGEZIT | −0.15 | 10 | 10.00 |
| prl_HELONUHEM | −0.24 | 8  | 50.00 |
| prl_WAMUGYLEV | −0.24 | 10 | 50.00 |
| prl_NINUBUSUD | −1.24 | 11 | 54.55 |
| prl_PYFIJATEH | −4.53 | 19 | 26.32 |
| prl_GYWOBAPAB | −3.45 | 9  | 11.11 |
| prl_DOVULELIT | −2.24 | 11 | 45.45 |
| prl_MOPABAMAB | 0.76  | 12 | 58.33 |
| prl_GIMOPATUJ | −1.24 | 10 | 20.00 |
| prl_FETUJONEV | −0.24 | 11 | 63.64 |
| prl_SUNODOWAM | −2.23 | 7  | 57.14 |
| prl_SEJASUHEF | −0.15 | 15 | 66.67 |
| prl_MOTAFOMUJ | −0.24 | 11 | 36.36 |
| prl_DEZEWANAG | 0.85  | 10 | 20.00 |
| prl_VUVOHUKUJ | 0.76  | 14 | 50.00 |
| prl_TAKYBINUS | −1.15 | 10 | 60.00 |
| prl_SONIHIHYK | −1.15 | 9  | 55.56 |
| prl_FUJYHUDYN | −1.24 | 9  | 33.33 |
| prl_HILATUWYK | −1.2  | 8  | 62.50 |
| prl_JUHASOGAF | −0.54 | 9  | 11.11 |
| prl_FEDUVEMIF | −0.21 | 8  | 62.50 |
| prl_GAKAZATIL | −0.24 | 9  | 44.44 |
| prl_TOMISIPOT | 0.46  | 7  | 28.57 |
| prl_TYPYHOTYG | −0.2  | 7  | 57.14 |
| prl_MABYWUMAG | −2.45 | 22 | 27.27 |
| prl_DEDUZAWIF | −1.16 | 9  | 44.44 |
| prl_GYKINAKIS | 0.76  | 11 | 45.45 |
| prl_TYTUTUSET | −1.12 | 8  | 62.50 |
| prl_DUWUTEFAW | −3.2  | 9  | 33.33 |
| prl_WAKUDOPUF | −2.11 | 16 | 25.00 |
| prl_PAHOSOBID | −1.26 | 15 | 73.33 |
| prl_LYFIWEVYM | −1.24 | 9  | 88.89 |
| prl_BUHENOPOL | −1.54 | 8  | 50.00 |
| prl_BEPEJELON | −0.15 | 23 | 21.74 |
| prl_JOSEWIFOK | 0.85  | 16 | 31.25 |
| prl_WYJIMAMUB | 0.76  | 10 | 50.00 |
| prl_KYKOZUMIF | −0.27 | 8  | 62.50 |
| prl_WUBAWOJEM | −0.24 | 8  | 50.00 |
| prl_PULYFITAF | 0.73  | 7  | 57.14 |
| prl_BYTYMEMUV | −0.24 | 10 | 60.00 |
| prl_MAFAGOBAS | −3.11 | 18 | 61.11 |
| prl_VELOPEJEZ | −1.24 | 11 | 72.73 |
| prl_MIDAKEMIW | 0.46  | 16 | 37.50 |
| prl_GINYPETYL | 0.76  | 7  | 28.57 |

---

---

|               |       |    |       |
|---------------|-------|----|-------|
| prl_WEKYPEBUN | -0.24 | 12 | 25.00 |
| prl_BIHOSOSAJ | 0.76  | 16 | 31.25 |
| prl_KAFIWOZID | -1.24 | 11 | 45.45 |
| prl_DEDUWATYW | -1.24 | 7  | 57.14 |
| prl_KUHIVOVIG | -0.17 | 11 | 45.45 |
| prl_KUWIMEHAW | -0.26 | 10 | 60.00 |
| prl_JIPYKAPAN | -2.17 | 8  | 37.50 |
| prl_GYJUKUTOV | -0.2  | 8  | 25.00 |
| prl_HOJUBISUF | -1.24 | 9  | 44.44 |
| prl_KEHEZozAT | 0.46  | 8  | 37.50 |
| prl_NIHIKAVOT | 0.76  | 14 | 50.00 |
| prl_BOGUHEDAP | -0.15 | 7  | 28.57 |
| prl_ZOWOPOKIS | -0.54 | 13 | 46.15 |
| prl_BEKADUMUV | -2.26 | 17 | 41.18 |
| prl_NOZOBAPAF | -0.24 | 11 | 45.45 |
| prl_KYPULOKYP | -1.24 | 10 | 70.00 |
| prl_FIZUZISAG | -1.45 | 11 | 36.36 |
| prl_HOVELAWIM | 1.76  | 9  | 33.33 |
| prl_DUTOBIVOH | 0.4   | 8  | 12.50 |
| prl_GYVAPIWYS | -4.06 | 18 | 33.33 |
| prl_PYTENIPYJ | -0.26 | 16 | 43.75 |
| prl_NYMUDOZOS | -3.23 | 13 | 38.46 |
| prl_VALEBOPAT | -0.24 | 8  | 12.50 |
| prl_SIGIJETYT | 0.73  | 8  | 12.50 |
| prl_MUTOVOMEH | -0.54 | 9  | 44.44 |
| prl_KINASEBIG | 0.46  | 9  | 44.44 |
| prl_KAKABIWEH | -1.24 | 12 | 25.00 |
| prl_SIJIPYMIS | 0.76  | 14 | 42.86 |
| prl_FESUKULEW | -1.26 | 8  | 62.50 |
| prl_JAVOPOFAS | 0.79  | 13 | 30.77 |
| prl_PIDAGODAW | -1.15 | 8  | 50.00 |
| prl_GUNULIBES | -0.12 | 10 | 50.00 |
| prl_NAMIWEJIM | -1.24 | 14 | 28.57 |
| prl_SILAZEDIV | -1.24 | 11 | 54.55 |
| prl_SUBOHOWIL | 0.73  | 16 | 37.50 |
| prl_TABYVUBAF | -1.24 | 9  | 55.56 |
| prl_BELAWISEP | -2.04 | 7  | 28.57 |
| prl_BUWEPODEG | -1.95 | 20 | 10.00 |
| prl_ZOMYFOJUP | -1.24 | 8  | 37.50 |
| prl_VODUSUFUB | -0.26 | 13 | 46.15 |
| prl_VISUDYSYH | 1.04  | 9  | 44.44 |
| prl_FISOWOVOG | -0.24 | 8  | 25.00 |
| prl_VUBEVEDUB | -2.26 | 7  | 28.57 |
| prl_TAJOVADED | -0.12 | 7  | 28.57 |
| prl_KEKIJUKYF | -0.24 | 8  | 75.00 |
| prl_WAGAPIDAM | -3.19 | 14 | 57.14 |
| prl_BAWEVYNAG | -0.24 | 8  | 25.00 |
| prl_NIPYPEKIJ | 0.85  | 13 | 38.46 |
| prl_PETYNINIL | -1.24 | 13 | 30.77 |
| prl_MOJOLYKID | 0.75  | 11 | 54.55 |
| prl_VEWIDUBYD | -0.2  | 8  | 25.00 |

---



---

|                |       |    |       |
|----------------|-------|----|-------|
| prl_POPOVYSUL  | -2.26 | 10 | 50.00 |
| prl_VUGYJIKOB  | -0.45 | 11 | 45.45 |
| prl_LYPAFAMYJ  | -2.08 | 12 | 16.67 |
| prl_JOTUKOWES  | -2.24 | 8  | 25.00 |
| prl_KUGYHAGIP  | -1.2  | 12 | 58.33 |
| prl_SOMUFEBUS  | 0.76  | 9  | 11.11 |
| prl_VIVAVEPAP  | -0.15 | 12 | 50.00 |
| prl_FONAFIHYM  | -1.45 | 9  | 33.33 |
| prl_TIVUPEJIM  | 1.55  | 11 | 45.45 |
| prl_HITABYJON  | -0.24 | 8  | 50.00 |
| prl_GAFUSYHEH  | -5.23 | 33 | 30.30 |
| prl_LUPOLYDUL  | -0.24 | 7  | 71.43 |
| prl_ZIHIDAVES  | -0.15 | 19 | 21.05 |
| prl_NIDAGOKUZ  | -4.53 | 15 | 33.33 |
| prl_JAFYSYKAT  | -0.12 | 14 | 57.14 |
| prl_BIZIHYNEZ  | 1.76  | 14 | 57.14 |
| prl_JAFIDELIS  | 1.82  | 27 | 48.15 |
| prl_TIVABYVEN  | -1.24 | 9  | 55.56 |
| prl_TAWEDAHAN  | -1.23 | 7  | 57.14 |
| prl_KUHADABEV  | -1.24 | 14 | 57.14 |
| prl_JYGYFOVEW  | -3.23 | 10 | 30.00 |
| prl_FATASYLIH  | -1.26 | 8  | 25.00 |
| prl_PUVYGOFOB  | -1.54 | 7  | 57.14 |
| prl_JUSALUZYK  | 0.79  | 9  | 55.56 |
| prl_ZEDYMITEK  | -1.26 | 8  | 37.50 |
| prl_FUSEGILYK  | -1.24 | 14 | 28.57 |
| prl_GAFUBETEH  | 0.76  | 11 | 63.64 |
| prl_FUHINGAMIT | -0.24 | 7  | 14.29 |
| prl_JINIBENUG  | -1.24 | 13 | 69.23 |
| prl_NOLUWUDUP  | 0.85  | 10 | 30.00 |
| prl_TUSIZIHIT  | 0.8   | 12 | 58.33 |
| prl_HAZADALOK  | -0.6  | 7  | 71.43 |
| prl_FULATOTOZ  | -0.24 | 12 | 33.33 |
| prl_NONEFIWYK  | -0.26 | 13 | 30.77 |
| prl_VUNAJIBIW  | -0.24 | 11 | 63.64 |
| prl_LUPINALUT  | -0.12 | 10 | 70.00 |
| prl_HIGUKAPUP  | -3.23 | 21 | 57.14 |
| prl_FUZUZODAK  | -0.24 | 9  | 44.44 |
| prl_KOJATUDOM  | -0.24 | 8  | 25.00 |
| prl_BYDYLUZSUZ | -0.24 | 9  | 33.33 |
| prl_LOSINODOM  | -0.18 | 8  | 25.00 |
| prl_JYPIWODIP  | -1.24 | 7  | 42.86 |
| prl_KOMUVEKUN  | 0.76  | 13 | 46.15 |
| prl_VUKAWIFYF  | -0.21 | 7  | 71.43 |
| prl_KOSIDYWIK  | 0.8   | 10 | 60.00 |
| prl_HYKYNUMEW  | 0.85  | 18 | 44.44 |
| prl_WATUWOJEL  | -0.15 | 12 | 33.33 |
| prl_BUKIJUMUD  | -0.24 | 10 | 60.00 |
| prl_DIDODAHYN  | -3.15 | 16 | 31.25 |
| prl_LENYPINEW  | -1.26 | 13 | 46.15 |
| prl_TIHUHAMAZ  | -0.15 | 8  | 37.50 |

---

---

|               |       |    |       |
|---------------|-------|----|-------|
| prl_DELYHEHUF | 0.76  | 13 | 53.85 |
| prl_DOKEBUHEZ | -0.15 | 8  | 12.50 |
| prl_TEZEWYVIP | 0.76  | 11 | 36.36 |
| prl_LOPIFEBES | -0.27 | 9  | 77.78 |
| prl_JOSIGUHYN | -3.19 | 11 | 54.55 |
| prl_LUVEPULEV | -0.15 | 9  | 66.67 |
| prl_ZOFYSOPUG | -2.24 | 8  | 37.50 |
| prl_GIZYBILYN | -1.24 | 15 | 26.67 |
| prl_ZYGYMODAM | -0.5  | 8  | 37.50 |
| prl_LEMYZYTIN | -0.15 | 14 | 50.00 |
| prl_ZEFUNIWYM | -1.23 | 8  | 25.00 |
| prl_WELADYGAG | -1.26 | 8  | 75.00 |
| prl_ZINYWUGOJ | -0.6  | 7  | 28.57 |
| prl_BOGIFOMYT | 0.76  | 8  | 50.00 |
| prl_NUTIJOLAB | -1.18 | 13 | 30.77 |
| prl_PEDAZYSYF | 0.73  | 15 | 60.00 |
| prl_JUDISOMUJ | -0.24 | 7  | 28.57 |
| prl_WEHYNAPOV | -0.24 | 10 | 50.00 |
| prl_KAHOLEHIS | -0.15 | 18 | 38.89 |
| prl_HUBAPIFUM | 0.76  | 17 | 35.29 |
| prl_LUSIKIZEN | 0.8   | 10 | 30.00 |
| prl_PUBAFISYF | -0.15 | 8  | 25.00 |
| prl_KAHOGEHIV | -1.23 | 12 | 50.00 |
| prl_DODEBIPUM | -1.15 | 10 | 40.00 |
| prl_FIWYVYKAD | -0.15 | 9  | 44.44 |
| prl_BUGYDOMOJ | -0.51 | 23 | 69.57 |
| prl_TYHALESIN | -4.52 | 14 | 28.57 |
| prl_NUDYMESOG | -1.24 | 12 | 50.00 |
| prl_BYVAZIBUT | 0.76  | 12 | 33.33 |
| prl_HUKOVUSIH | -0.95 | 21 | 9.52  |
| prl_FYDOKOJYL | -1.16 | 9  | 66.67 |
| prl_VAHEVOTEV | -0.15 | 18 | 22.22 |
| prl_MEGEPILEG | -0.23 | 12 | 41.67 |
| prl_ZIKOWEKO  | 0.75  | 28 | 32.14 |
| prl_KYWOWUDAT | -2.15 | 11 | 54.55 |
| prl_TAKUNODOF | 0.76  | 9  | 66.67 |
| prl_TOFOKINIL | -2.45 | 18 | 38.89 |
| prl_PAKIDEKYV | -1.07 | 13 | 30.77 |
| prl_JOMEHOTIF | -1.24 | 12 | 16.67 |
| prl_HAMELYSOD | -0.04 | 7  | 57.14 |
| prl_VANULOGUB | 0.8   | 12 | 41.67 |
| prl_MUBOWAVEZ | 0.76  | 11 | 54.55 |
| prl_LOFEVAPYW | -4.07 | 14 | 42.86 |
| prl_PYFANOTYS | 0.73  | 18 | 55.56 |
| prl_FAVOHIDUP | -0.04 | 8  | 50.00 |
| prl_PYKAVYMYS | 0.73  | 8  | 50.00 |
| prl_FADAVEPIH | -1.24 | 10 | 50.00 |
| prl_GALUGUKUS | 0.76  | 9  | 22.22 |
| prl_VUWYDODIG | -0.15 | 7  | 42.86 |
| prl_KELUDUZEW | -0.24 | 10 | 20.00 |
| prl_HYWYLUWAH | -2.26 | 11 | 45.45 |

---

---

|                |       |    |       |
|----------------|-------|----|-------|
| prl_HIMOKEKEB  | -1.16 | 14 | 50.00 |
| prl_JASOBADDEB | -2.23 | 12 | 8.33  |
| prl_NOJUHULUG  | 1.75  | 20 | 55.00 |
| prl_SILYJUHOOG | -0.17 | 19 | 31.58 |
| prl_NYZYPOBUW  | -1.15 | 10 | 60.00 |
| prl_TAGIDIZYJ  | -1.24 | 8  | 62.50 |
| prl_SEJOBUVUT  | -1.6  | 7  | 57.14 |
| prl_PEDUSUMEB  | -0.26 | 12 | 33.33 |
| prl_ZASENAKOZ  | -2.26 | 11 | 45.45 |
| prl_BYHUDYMIP  | -0.24 | 7  | 28.57 |
| prl_MOGUGIGEL  | -0.15 | 14 | 50.00 |
| prl_FISOKAZUH  | 0.73  | 14 | 57.14 |
| prl_GOBIZYJOK  | -0.25 | 12 | 33.33 |
| prl_LAZOVEPYT  | 1.76  | 12 | 50.00 |
| prl_JABYLEDEB  | 0.76  | 10 | 60.00 |
| prl_ZODOZADAS  | 0.76  | 12 | 50.00 |
| prl_LEJEDOWAH  | -1.24 | 13 | 46.15 |
| prl_TIFENYPEW  | 0.79  | 7  | 28.57 |
| prl_ZENOSUJAH  | 0.79  | 20 | 20.00 |
| prl_ZASEMAMYK  | -1.45 | 14 | 42.86 |
| prl_NYSASUMAH  | -2.04 | 10 | 60.00 |
| prl_TYBUVYSYV  | -0.24 | 10 | 40.00 |
| prl_KUFYGIMEN  | -3.26 | 13 | 38.46 |
| prl_NOZYBIMUF  | -1.18 | 9  | 33.33 |
| prl_DUTUZITYG  | -2.15 | 14 | 14.29 |
| prl_HUPYTUGEZ  | 0.85  | 8  | 50.00 |
| prl_TOKAMYSAP  | -0.24 | 9  | 33.33 |
| prl_DUVIMEVAZ  | 0.05  | 8  | 50.00 |
| prl_WOJISODEV  | -2.26 | 14 | 50.00 |
| prl_TIVUSOVUS  | -2.16 | 7  | 28.57 |
| prl_KAPUVANUM  | -0.15 | 14 | 64.29 |
| prl_SOFEGAKEJ  | -2.24 | 11 | 54.55 |
| prl_ZUZYGUMAT  | 0.76  | 9  | 33.33 |
| prl_DAGUFABOD  | 0.76  | 8  | 50.00 |
| prl_SAMIZABON  | 0.76  | 17 | 35.29 |
| prl_POPYVIDYB  | -1.24 | 7  | 28.57 |
| prl_WIPUFIGOM  | 0.46  | 13 | 61.54 |
| prl_SOGAZYBUP  | -3.03 | 16 | 25.00 |
| prl_TAKANELEW  | -0.27 | 7  | 42.86 |
| prl_DYFEKEFOT  | 0.73  | 12 | 66.67 |
| prl_VUDYJEHIN  | -1.24 | 8  | 50.00 |
| prl_DYMUPYPIF  | -2.23 | 11 | 54.55 |
| prl_MIBAKELUN  | -0.24 | 7  | 57.14 |
| prl_VUBOKYWIJ  | 0.73  | 18 | 61.11 |
| prl_LUJOVINEM  | -0.2  | 14 | 50.00 |
| prl_ZOPAKYTOB  | 0.73  | 12 | 58.33 |
| prl_FIDALODEN  | -0.15 | 22 | 31.82 |
| prl_PULUPUDEK  | -0.24 | 7  | 14.29 |
| prl_GAPYVUFIL  | 0.8   | 7  | 57.14 |
| prl_LAMANADIZ  | 0.4   | 12 | 16.67 |
| prl_VYSILUPYH  | -1.15 | 12 | 25.00 |

---

---

|               |       |    |       |
|---------------|-------|----|-------|
| prl_VUFYMUDOK | 0.76  | 7  | 42.86 |
| prl_LIHOKOVUF | −0.24 | 10 | 40.00 |
| prl_SEKAJOMOK | −2.23 | 9  | 22.22 |
| prl_HOPABYJAT | 0.73  | 10 | 30.00 |
| prl_PATUKOZOS | −0.26 | 12 | 58.33 |
| prl_TIVISAHED | −1.24 | 16 | 31.25 |
| prl_FEJYYSUV  | −3.17 | 23 | 39.13 |
| prl_LOGEGYKOS | −0.24 | 7  | 28.57 |
| prl_KUNYPOJOS | 0.55  | 12 | 33.33 |
| prl_WYPAHYJUS | 0.76  | 11 | 45.45 |
| prl_KIGIFOTIW | −0.24 | 13 | 61.54 |
| prl_HELYBAZEG | −1.15 | 10 | 60.00 |
| prl_BYZAWOHIJ | 0.76  | 14 | 57.14 |
| prl_GOZUBULYS | −1.15 | 12 | 75.00 |
| prl_MUWUPAVYH | −0.15 | 8  | 50.00 |
| prl_JYJENIBIH | −1.23 | 10 | 40.00 |
| prl_TUNEDISAM | −1.24 | 21 | 9.52  |
| prl_BOLUWUGYW | −1.2  | 12 | 50.00 |
| prl_PADAFIMUB | −3.16 | 12 | 41.67 |
| prl_HITAHOKEJ | −3.53 | 9  | 22.22 |
| prl_WAKOWYKAS | −3.23 | 12 | 33.33 |
| prl_LOVEKONUK | 0.46  | 9  | 66.67 |
| prl_NIKYDOKOP | −0.24 | 7  | 57.14 |
| prl_WAFIPYHUS | −0.04 | 12 | 41.67 |
| prl_WIMITOGIS | −1.2  | 9  | 33.33 |
| prl_HIZEVOLIT | 0.4   | 13 | 61.54 |
| prl_ZENAGUJOS | −0.24 | 11 | 36.36 |
| prl_VYZOWIPUS | −0.26 | 16 | 25.00 |
| prl_BIPUPUFAW | 0.85  | 12 | 33.33 |
| prl_LYWIFATEW | 0.76  | 9  | 66.67 |
| prl_MIHABIDUB | −3.53 | 10 | 20.00 |
| prl_WUDYBAWAN | 0.79  | 7  | 42.86 |
| prl_BOBADUTAZ | 0.8   | 11 | 63.64 |
| prl_LOPUZYBUK | −0.24 | 10 | 60.00 |
| prl_ZABEMUJAK | 0.4   | 9  | 0.00  |
| prl_FUWYHYMOL | −0.15 | 9  | 44.44 |
| prl_NAZEBAJYD | −7.5  | 21 | 52.38 |
| prl_DUNEZIKET | −1.24 | 9  | 77.78 |
| prl_VEPOVIPYW | −1.6  | 7  | 57.14 |
| prl_VYJYKAKAL | −0.54 | 8  | 12.50 |
| prl_VEJIHENYS | −1.24 | 8  | 62.50 |
| prl_DAPEBADOL | −0.17 | 13 | 38.46 |
| prl_HUTEBIKYT | −2.16 | 7  | 14.29 |
| prl_TOMOFOGOH | −2.15 | 16 | 31.25 |
| prl_GUDYKEVUM | −0.15 | 14 | 57.14 |
| prl_LIBYKAPIS | −0.26 | 16 | 37.50 |
| prl_ZONUMEWUL | −0.15 | 16 | 31.25 |
| prl_VIGYVUBON | 0.73  | 9  | 55.56 |
| prl_LYNELUGEJ | −0.54 | 9  | 22.22 |
| prl_WYDYHOBYN | −2.15 | 17 | 17.65 |
| prl_BIGEWUPOW | −1.44 | 17 | 41.18 |

---

---

|               |       |    |       |
|---------------|-------|----|-------|
| prl_DAZANUZES | -1.24 | 9  | 44.44 |
| prl_PUHUWUGIK | 0.76  | 7  | 85.71 |
| prl_WUGETIHAV | -1.24 | 7  | 57.14 |
| prl_TEZESOBIL | -0.26 | 16 | 37.50 |
| prl_SUTYNIJYK | -4.07 | 16 | 37.50 |
| prl_MIJYZYNEZ | -1.23 | 8  | 37.50 |
| prl_NEJONAHET | -1.24 | 16 | 31.25 |
| prl_SISEZEZAV | -1.23 | 11 | 45.45 |
| prl_MEDYZYBOV | -1.95 | 18 | 22.22 |
| prl_KEPUBYMIB | -1.15 | 14 | 21.43 |
| prl_PEGOWAVOJ | 0.8   | 10 | 60.00 |
| prl_MUZYDEBUD | 0.82  | 12 | 58.33 |
| prl_DIZOGOMIK | -0.26 | 14 | 42.86 |
| prl_MUIVAVUJ  | -0.15 | 13 | 23.08 |
| prl_PYBOHULAF | -0.12 | 12 | 58.33 |
| prl_BUKIDANYM | 0.73  | 14 | 42.86 |
| prl_FYBYDOBUP | -1.54 | 7  | 14.29 |
| prl_BIPUWELUP | -0.54 | 9  | 44.44 |
| prl_ZUHUNELIF | -0.21 | 10 | 70.00 |
| prl_KIKUJEHYV | -1.6  | 10 | 80.00 |
| prl_TABOTIPIK | -2.24 | 7  | 57.14 |
| prl_JAKIJABUS | -0.54 | 7  | 14.29 |
| prl_ZALEDIPEZ | 0.76  | 16 | 18.75 |
| prl_HOVIBUSUB | -1.24 | 12 | 50.00 |
| prl_JYDIMIBYW | -2.24 | 10 | 50.00 |
| prl_NIDATYZEZ | -0.54 | 7  | 42.86 |
| prl_FAKEZEJIV | -2.24 | 16 | 31.25 |
| prl_JAHOPOMYP | -0.24 | 9  | 44.44 |
| prl_JYBOMEMUN | -1.24 | 12 | 25.00 |
| prl_TOBASEGOM | -0.53 | 7  | 28.57 |
| prl_ZEVAHENID | 0.73  | 13 | 46.15 |
| prl_TAZESEFEF | -0.24 | 7  | 14.29 |
| prl_SUNITOVYS | -1.5  | 7  | 85.71 |
| prl_JABIDYHIL | -0.24 | 8  | 12.50 |
| prl_LUJABIDUD | -0.16 | 12 | 33.33 |
| prl_DIMOVILUV | -0.54 | 12 | 33.33 |
| prl_LIPYBYWYB | -0.24 | 10 | 50.00 |
| prl_GEFOWUMIZ | 0.76  | 8  | 50.00 |
| prl_FUVIZADAT | 0.79  | 9  | 88.89 |
| prl_DIWYGELUP | 0.85  | 13 | 46.15 |
| prl_FAGIPAWEM | -2.6  | 23 | 17.39 |
| prl_PIDINIZAP | 0.76  | 8  | 25.00 |
| prl_LEPEMYMUD | -0.6  | 8  | 37.50 |
| prl_DOMAKUNAV | -0.24 | 7  | 57.14 |
| prl_NYZEKITYD | -3.17 | 11 | 45.45 |
| prl_LEHAMELAZ | -0.24 | 10 | 50.00 |
| prl_MYDOBYPET | -3.23 | 9  | 33.33 |
| prl_HUVYPYTAH | -1.24 | 11 | 54.55 |
| prl_MUVONESUF | 0.76  | 9  | 11.11 |
| prl_ZUDAJEGIK | -2.23 | 10 | 30.00 |
| prl_BYJAPOWOH | -0.24 | 11 | 54.55 |

---

---

|                |       |    |       |
|----------------|-------|----|-------|
| prl_NYTYHODUZ  | -1.15 | 11 | 72.73 |
| prl_FYGYPSIW   | 0.4   | 7  | 14.29 |
| prl_ZANOSAPED  | -0.24 | 12 | 83.33 |
| prl_BEFIMOLOP  | 0.76  | 7  | 42.86 |
| prl_WASUSOLUF  | 0.76  | 8  | 25.00 |
| prl_BEGUDYKAT  | -1.16 | 16 | 43.75 |
| prl_JUZUFECEK  | -1.24 | 19 | 21.05 |
| prl_DABOMIZYJ  | -2.16 | 7  | 28.57 |
| prl_FUHELIVUG  | -1.23 | 8  | 37.50 |
| prl_SYJUKUDYN  | -2.24 | 8  | 25.00 |
| prl_ZETOMUMYD  | -1.26 | 17 | 29.41 |
| prl_BEMOZALUH  | -1.16 | 15 | 26.67 |
| prl_FIGUVUPYH  | -1.24 | 8  | 75.00 |
| prl_DYBEJANAG  | 0.76  | 8  | 62.50 |
| prl_MENIMOBIS  | 0.76  | 10 | 50.00 |
| prl_JASUJIMUF  | -0.24 | 7  | 42.86 |
| prl_HULEDEZYG  | -2.23 | 13 | 38.46 |
| prl_BYPEWOLIL  | -2.23 | 13 | 38.46 |
| prl_NITEPAWON  | -0.15 | 13 | 46.15 |
| prl_BYNIHUMOK  | 1.79  | 8  | 37.50 |
| prl_MYVEVOBAS  | 0.76  | 10 | 50.00 |
| prl_DUTEJYHYP  | -0.24 | 9  | 66.67 |
| prl_HEKULEGIG  | -0.54 | 12 | 41.67 |
| prl_VUFYNAFIV  | -0.23 | 11 | 45.45 |
| prl_DAFIKOTEG  | 0.76  | 7  | 42.86 |
| prl_VAWULEBYT  | -0.24 | 9  | 22.22 |
| prl_GIZEVABUZ  | -2.07 | 12 | 58.33 |
| prl_METAFEVIF  | -0.12 | 20 | 30.00 |
| prl_LOTEPEPAT  | -2.15 | 9  | 44.44 |
| prl_LAPUPAZUK  | -0.24 | 20 | 65.00 |
| prl_PEZUMEVYS  | 0.85  | 21 | 57.14 |
| prl_GAHIKANUK  | -1.26 | 21 | 57.14 |
| prl_NINEGODOF  | -0.24 | 12 | 33.33 |
| prl_VUFIMOZYK  | -0.24 | 11 | 45.45 |
| prl_WYSUZAZOH  | -0.24 | 8  | 50.00 |
| prl_VUTAFYKUV  | 0.76  | 11 | 9.09  |
| prl_FIFUJATED  | -1.26 | 8  | 37.50 |
| prl_HULEZASAN  | -1.26 | 7  | 57.14 |
| prl_ZAPOWOJIN  | -1.26 | 17 | 29.41 |
| prl_LIMOSIWAD  | -0.24 | 7  | 28.57 |
| prl_SEHIGISUM  | -0.54 | 8  | 12.50 |
| prl_MISEDYGAF  | -0.16 | 7  | 28.57 |
| prl_LYLABIJEK  | 0.4   | 11 | 63.64 |
| prl_MEGIHIIJIH | -1.16 | 7  | 57.14 |
| prl_LADYKUDYV  | 0.76  | 10 | 70.00 |
| prl_TUKUWOLEF  | 0.85  | 7  | 14.29 |
| prl_JUKYJAGUB  | -0.24 | 9  | 22.22 |
| prl_LUBUFUBYG  | 0.76  | 11 | 18.18 |
| prl_FUFOJEHEB  | 0.76  | 13 | 46.15 |
| prl_HYGEHOGAS  | 0.76  | 14 | 21.43 |
| prl_DUPIHOHAP  | -6.53 | 37 | 27.03 |

---

---

|                 |       |    |       |
|-----------------|-------|----|-------|
| prl_HYBIKEZYV   | −0.6  | 12 | 58.33 |
| prl_KUJUVONOP   | −0.6  | 9  | 44.44 |
| prl_VYBOTEHUT   | 0.79  | 11 | 27.27 |
| prl_SUWYMETAW   | −0.15 | 11 | 18.18 |
| prl_LIMOHUDON   | −0.24 | 13 | 61.54 |
| prl_DOBAWOWAN   | −1.24 | 13 | 23.08 |
| prl_DOBOZUGUP   | −1.26 | 14 | 35.71 |
| prl_MIJYKYSOH   | −1.24 | 10 | 50.00 |
| prl_GIJYBETEM   | −1.24 | 9  | 44.44 |
| prl_LYNOBIZEW   | −2.23 | 22 | 68.18 |
| prl_TAWEFUPOH   | −0.24 | 8  | 87.50 |
| prl_ZYMOFEDED   | −1.15 | 9  | 66.67 |
| prl_LUWOWUTEZ   | 0.46  | 7  | 14.29 |
| prl_HABUMENUN   | −0.15 | 7  | 28.57 |
| prl_BOLOTYSOH   | −0.15 | 15 | 53.33 |
| prl_SUKOBYBEM   | −2.2  | 8  | 50.00 |
| prl_JOFUSUWUB   | 0.76  | 9  | 44.44 |
| prl_NIMAJIWIK   | −0.24 | 10 | 30.00 |
| prl_FIJYNASUP   | −0.24 | 17 | 35.29 |
| prl_FYFOLIDAD   | −0.18 | 18 | 50.00 |
| prl_MYFOMOBYL   | 0.8   | 13 | 30.77 |
| prl_SOJODIWOP   | −0.15 | 13 | 30.77 |
| prl_MENADASUZ   | −5.23 | 32 | 28.13 |
| prl_WUTUGIBOD   | −1.23 | 9  | 44.44 |
| prl_ZIKAWABYS   | −0.15 | 10 | 40.00 |
| prl_SOFOLEHUG   | −0.6  | 11 | 27.27 |
| prl_LODEVAVOL   | −0.2  | 11 | 63.64 |
| prl_MYNIWITUG   | −1.08 | 8  | 37.50 |
| prl_FUZAFAJOZ   | −1.24 | 8  | 50.00 |
| prl_JEMYFIFIV   | 0.76  | 13 | 46.15 |
| prl_JAHEPILUJ   | −1.12 | 8  | 62.50 |
| prl_ZIZAMODAN   | −1.6  | 8  | 50.00 |
| prl_FYSOGOPIT   | −2.23 | 15 | 40.00 |
| prl_KYHIKETAW   | −0.24 | 7  | 57.14 |
| prl_MAZEHAHAWIB | −0.24 | 8  | 50.00 |
| prl_KYVYZYMIB   | −1.26 | 11 | 18.18 |
| prl_NOPOFYBIW   | −1.23 | 10 | 20.00 |
| prl_SYFAZEDEW   | −0.24 | 7  | 42.86 |
| prl_TABOTOPOT   | 0.76  | 16 | 31.25 |
| prl_HIPIPAMOH   | −0.54 | 7  | 42.86 |
| prl_NYWYNITIJ   | 0.76  | 11 | 45.45 |
| prl_FEMYTIMOZ   | −0.24 | 9  | 33.33 |
| prl_GONUJEBAZ   | −1.23 | 11 | 54.55 |
| prl_ZUJOGULOJ   | −0.51 | 9  | 44.44 |
| prl_HOMUVUWAK   | 0.96  | 10 | 10.00 |
| prl_KILUNULIP   | −0.15 | 8  | 37.50 |
| prl_KAFUTALYZ   | −2.24 | 11 | 36.36 |
| prl_WIKEJIWYN   | −1.54 | 13 | 61.54 |
| prl_DYTENEJYZ   | −2.53 | 18 | 22.22 |
| prl_ZOGEFOPYT   | −1.26 | 15 | 60.00 |
| prl_SUJUDAJAD   | −2.26 | 10 | 50.00 |

---

---

|                |       |    |       |
|----------------|-------|----|-------|
| prl_GATUDOGOJ  | 0.76  | 7  | 28.57 |
| prl_ZUWASELEN  | -1.6  | 9  | 77.78 |
| prl_JIDIJYNUK  | -0.04 | 8  | 62.50 |
| prl_JEJIMUKAZ  | -0.24 | 10 | 40.00 |
| prl_NEZYKUFYT  | 0.76  | 9  | 44.44 |
| prl_SISYMASYD  | -0.15 | 8  | 50.00 |
| prl_PIWYBYKEZ  | -1.26 | 15 | 53.33 |
| prl_LIWOGADON  | 0.76  | 9  | 44.44 |
| prl_GYKOZYPYF  | -0.6  | 8  | 62.50 |
| prl_JAHYHYTIZ  | -3.51 | 14 | 42.86 |
| prl_NYNISEVYV  | 0.85  | 10 | 50.00 |
| prl_SYBAWATYP  | -0.06 | 16 | 37.50 |
| prl_MEMUHYPEZ  | -0.26 | 30 | 53.33 |
| prl_FINOGENEZ  | -3.14 | 20 | 15.00 |
| prl_BOKEYYGAB  | 0.73  | 7  | 57.14 |
| prl_HYPAKOPHEH | -0.24 | 9  | 55.56 |
| prl_TAMIKOLIN  | 0.76  | 18 | 27.78 |
| prl_JIZUZEHUD  | -1.07 | 16 | 56.25 |
| prl_DEMYVUNAB  | 0.76  | 14 | 21.43 |
| prl_DEPIWYVUB  | 1.76  | 8  | 37.50 |
| prl_JIFAWELOM  | 0.76  | 15 | 33.33 |
| prl_FOLOGODUJ  | 1.76  | 12 | 66.67 |
| prl_MAWYBIZIP  | -2.26 | 11 | 54.55 |
| prl_PIDIDOJOS  | -0.24 | 7  | 28.57 |
| prl_KAPIGOTOM  | -0.2  | 8  | 25.00 |
| prl_JOWOFEJUM  | -1.15 | 13 | 30.77 |
| prl_WIHOGESUV  | -0.24 | 10 | 70.00 |
| prl_FIZUNUKIF  | 0.4   | 8  | 12.50 |
| prl_DEKAHUFIP  | -0.15 | 10 | 50.00 |
| prl_POGAPYSIW  | -0.12 | 12 | 58.33 |
| prl_HEWYVYWYP  | -0.24 | 10 | 50.00 |
| prl_FOBYLUZUD  | 0.73  | 12 | 41.67 |
| prl_TANETUNUL  | -1.04 | 9  | 44.44 |
| prl_VUDESUWUP  | 0.8   | 11 | 63.64 |
| prl_DYKIZEDUW  | 0.76  | 7  | 57.14 |
| prl_KYGIWIZUZ  | 0.76  | 16 | 43.75 |
| prl_DYDAKASYB  | 1.76  | 11 | 45.45 |
| prl_FOKIPYVIM  | -2.24 | 9  | 55.56 |
| prl_NYSYWIMIJ  | -1.15 | 13 | 46.15 |
| prl_ZYWEKONES  | -0.07 | 7  | 42.86 |
| prl_PATENUHEK  | 0.8   | 11 | 45.45 |
| prl_PYFYBAJIT  | -0.24 | 10 | 40.00 |
| prl_FAJEPUSUK  | -0.24 | 11 | 27.27 |
| prl_TUHEGEJED  | -0.07 | 8  | 50.00 |
| prl_SEFAHUWUJ  | -1.23 | 9  | 44.44 |
| prl_MUGUSABAK  | -0.26 | 10 | 40.00 |
| prl_SIKAGIBYH  | -0.18 | 9  | 55.56 |
| prl_BUFEWUFUD  | -0.23 | 13 | 30.77 |
| prl_GISIVAZUJ  | 0.04  | 7  | 42.86 |
| prl_MEMOVOVYL  | -2.4  | 20 | 55.00 |
| prl_DEGIDEBOL  | -1.23 | 17 | 41.18 |

---



---

|                |       |    |       |
|----------------|-------|----|-------|
| prl_POJETYKYT  | -0.15 | 12 | 50.00 |
| prl_POMUDEWAT  | -0.15 | 15 | 46.67 |
| prl_JODIGEFUG  | 0.79  | 10 | 30.00 |
| prl_LYFIKUVIF  | -3.25 | 10 | 20.00 |
| prl_JYSOZEHAH  | -1.24 | 12 | 50.00 |
| prl_NETUFYLOM  | 0.76  | 7  | 28.57 |
| prl_JEPOMIHOF  | 0.4   | 7  | 0.00  |
| prl_FOKUMETYK  | 0.76  | 18 | 27.78 |
| prl_TISUNIWET  | -2.26 | 11 | 54.55 |
| prl_DEVYJYVEH  | 1.76  | 11 | 63.64 |
| prl_NIDIZEVOK  | 0.76  | 14 | 50.00 |
| prl_VINOZUJUJ  | 0.76  | 15 | 26.67 |
| prl_SUFYHYKYP  | -1.26 | 7  | 57.14 |
| prl_GEDIDEFYP  | -0.2  | 13 | 53.85 |
| prl_SEJOHUJYW  | -1.04 | 9  | 44.44 |
| prl_FANUTEKYD  | 0.76  | 12 | 16.67 |
| prl_GATIWENON  | -0.12 | 7  | 57.14 |
| prl_GONUDYPAT  | -3.2  | 13 | 38.46 |
| prl_KUHYJYPAH  | -0.24 | 10 | 20.00 |
| prl_MYFEWIMOF  | 0.76  | 8  | 37.50 |
| prl_SYNAHIMOG  | 0.76  | 15 | 40.00 |
| prl_JEMUPAFUZ  | 0.76  | 12 | 41.67 |
| prl_GOWIMAGIK  | 0.76  | 17 | 52.94 |
| prl_WAVYLEVEV  | 0.76  | 10 | 40.00 |
| prl_LEJYNYHOM  | -1.15 | 13 | 69.23 |
| prl_WUHONEWUW  | -2.44 | 18 | 44.44 |
| prl_JEDYTYWOP  | 1.79  | 10 | 20.00 |
| prl_TEBOPYHUD  | -1.15 | 8  | 37.50 |
| prl_NEDIKYFEL  | 0.85  | 17 | 35.29 |
| prl_VILYJYJUB  | -1.24 | 10 | 0.00  |
| prl_BEMASUNAP  | -0.6  | 11 | 45.45 |
| prl_FOTEBYLUL  | 0.8   | 8  | 50.00 |
| prl_KEDAVITIL  | -0.24 | 8  | 50.00 |
| prl_KEZUDELUK  | 0.46  | 11 | 36.36 |
| prl_SOMIPYMYH  | -0.04 | 9  | 44.44 |
| prl_DYKYMAVYM  | 0.04  | 11 | 36.36 |
| prl_FONUGAKAJ  | -2.18 | 10 | 60.00 |
| prl_GAJEZEFAM  | -1.18 | 15 | 46.67 |
| prl_GODAKULOW  | -0.6  | 10 | 30.00 |
| prl_WOHASYVIG  | -1.15 | 8  | 75.00 |
| prl_LASUTUJUN  | 0.76  | 15 | 53.33 |
| prl_POMUZAHYW  | 0.76  | 16 | 43.75 |
| prl_BUTASAKYG  | -0.26 | 16 | 25.00 |
| prl_BYJEKAZUJ  | -3.23 | 11 | 27.27 |
| prl_ZIMODISUZ  | 0.76  | 7  | 57.14 |
| prl_SEKESEZUZ  | -0.24 | 13 | 30.77 |
| prl_TYLENOJUJH | -0.24 | 8  | 12.50 |
| prl_WITOWYPIH  | -1.15 | 7  | 0.00  |
| prl_VUNUFEKUV  | -1.14 | 15 | 20.00 |
| prl_WUVOMYHYG  | -0.24 | 9  | 55.56 |
| prl_ZIZIFISIK  | 0.76  | 9  | 22.22 |

---

---

|               |       |    |       |
|---------------|-------|----|-------|
| prl_HESOBAGIF | −0.24 | 10 | 40.00 |
| prl_WUZUPEVEK | 0.73  | 11 | 72.73 |
| prl_JYDOGUHOV | 0.76  | 11 | 36.36 |
| prl_NOTEZEZIK | −1.26 | 7  | 28.57 |
| prl_GIFIVOKAP | −1.24 | 15 | 33.33 |
| prl_KIDENYZOZ | −0.51 | 10 | 50.00 |
| prl_FEWIMEBEG | −1.15 | 16 | 18.75 |
| prl_WOTULYWIV | 0.76  | 10 | 20.00 |
| prl_TYTEPUFAG | −0.24 | 15 | 33.33 |
| prl_DAKOWUDAF | 0.76  | 17 | 35.29 |
| prl_JUMUZOMOL | −1.2  | 9  | 55.56 |
| prl_GILADIWAJ | −0.21 | 7  | 28.57 |
| prl_WIKIBYJIW | 0.5   | 7  | 71.43 |
| prl_NIHINULIJ | −0.24 | 8  | 50.00 |
| prl_GIDODIFEG | 0.85  | 14 | 35.71 |
| prl_MEJAFOVYL | −0.24 | 10 | 30.00 |
| prl_TOKYNIKOB | −2.5  | 8  | 50.00 |
| prl_PEVIVUHAT | 0.46  | 7  | 0.00  |
| prl_FUJETYJYP | −1.15 | 19 | 21.05 |
| prl_GAJAZUMYD | −2.15 | 20 | 15.00 |
| prl_MINYKAMYJ | −2.24 | 11 | 54.55 |
| prl_DYMUHOKAW | −3.14 | 12 | 41.67 |
| prl_ZAMIVIZAS | 1.46  | 9  | 44.44 |
| prl_BOWEPIKEB | −0.15 | 7  | 57.14 |
| prl_MEJOWUDOH | 0.76  | 15 | 40.00 |
| prl_HOWODULUB | −0.24 | 7  | 28.57 |
| prl_HAVYSPET  | −1.99 | 7  | 0.00  |
| prl_BOKOLAZOZ | −0.24 | 7  | 71.43 |
| prl_DAHAPOWES | −3.23 | 8  | 37.50 |
| prl_BOLAJEKAH | −2.23 | 17 | 29.41 |
| prl_NUSYBEGIV | −3.23 | 23 | 26.09 |
| prl_BYWASIKAD | −0.15 | 19 | 26.32 |
| prl_BUDAVOGUK | −3.25 | 7  | 42.86 |
| prl_MAGYBOHAN | −0.24 | 7  | 57.14 |
| prl_KUFIBIZUZ | −1.15 | 18 | 33.33 |
| prl_KIKEZEVYM | −0.24 | 14 | 28.57 |
| prl_NOWYPAFEM | 0.76  | 14 | 35.71 |
| prl_NASYFAZEW | −0.54 | 7  | 42.86 |
| prl_PEWUKAGAT | −2.16 | 8  | 50.00 |
| prl_TAZYJAWOB | 0.76  | 9  | 55.56 |
| prl_HUZYMIJAN | −0.24 | 10 | 20.00 |
| prl_HIHITUZID | −0.15 | 12 | 33.33 |
| prl_NUKAWUSUL | 0.96  | 11 | 36.36 |
| prl_VUJADYHUS | −1.26 | 7  | 57.14 |
| prl_GUHUSAVYV | 0.73  | 12 | 33.33 |
| prl_TEPYFOPOT | −0.15 | 14 | 42.86 |
| prl_KYNOSANEV | −2.16 | 9  | 44.44 |
| prl_FITAKAJET | −0.24 | 11 | 36.36 |
| prl_NYMUKEWIL | −0.15 | 13 | 38.46 |
| prl_FOJYFOMOD | −0.15 | 8  | 37.50 |
| prl_GYFYNEZAD | −0.15 | 21 | 19.05 |

---

---

|                 |       |    |       |
|-----------------|-------|----|-------|
| prl_DUFOWUMID   | -0.15 | 9  | 33.33 |
| prl_JEGIVAMAJ   | -1.24 | 10 | 50.00 |
| prl_PAJIVUNIM   | -0.24 | 11 | 45.45 |
| prl_VOSELELOV   | -1.6  | 10 | 60.00 |
| prl_KEMYZIJUF   | -0.24 | 7  | 42.86 |
| prl_HYHYJOKEW   | 0.76  | 9  | 55.56 |
| prl_SIKOTONAJ   | -0.54 | 7  | 57.14 |
| prl_JETEJUGUK   | -2.17 | 9  | 55.56 |
| prl_FOPEDIMYS   | -5.23 | 34 | 29.41 |
| prl_PODELYPUV   | -2.23 | 19 | 26.32 |
| prl_VYLOMUHYT   | -2.11 | 11 | 45.45 |
| prl_MUVYTONAJ   | 0.76  | 7  | 85.71 |
| prl_HASUKEPIG   | -1.23 | 11 | 36.36 |
| prl_DYDUGEDAB   | 0.76  | 17 | 47.06 |
| prl_DAZIGOVAM   | 0.4   | 9  | 22.22 |
| prl_LELEPYTUD   | -0.24 | 9  | 44.44 |
| prl_HOPIHEKEF   | 0.73  | 17 | 41.18 |
| prl_TUDYJYDON   | 0.85  | 10 | 50.00 |
| prl_HUNALIVYP   | -4.53 | 29 | 24.14 |
| prl_BIPAVETOD   | -1.54 | 7  | 14.29 |
| prl_HEBEKEWYN   | -0.26 | 13 | 46.15 |
| prl_KYJEPUIYN   | 0.85  | 18 | 27.78 |
| prl_GIPEJAHAW   | -2.53 | 12 | 41.67 |
| prl_FILUPIKAV   | -2.45 | 18 | 50.00 |
| prl_MAHULAJIZ   | -0.54 | 10 | 60.00 |
| prl_ZEDUPILUT   | -2.24 | 12 | 58.33 |
| prl_KAGUTIGEF   | -0.15 | 11 | 36.36 |
| prl_NOJISUJIS   | -1.15 | 9  | 55.56 |
| prl_TUNYJYZOD   | 0.76  | 8  | 50.00 |
| prl_NENALYBOW   | -2.2  | 7  | 57.14 |
| prl_VYFOHYMIP   | -1.17 | 10 | 40.00 |
| prl_KUTEJIGAM   | -0.51 | 7  | 28.57 |
| prl_VONYFYFYPAL | -0.24 | 11 | 63.64 |
| prl_PAHEVYTOB   | 1.76  | 21 | 42.86 |
| prl_PANEPEDUT   | -0.16 | 10 | 40.00 |
| prl_NUVAWYVYM   | -0.24 | 11 | 45.45 |
| prl_KIBYKIZEH   | 0.76  | 10 | 50.00 |
| prl_MIZUNAFIZ   | -3.23 | 10 | 40.00 |
| prl_ZOFUSAZAV   | -0.24 | 9  | 22.22 |
| prl_ZIFOVUJUP   | -1.24 | 9  | 33.33 |
| prl_WIFYVEVEN   | 0.46  | 9  | 44.44 |
| prl_FUNUPUBAZ   | 0.73  | 7  | 57.14 |
| prl_HATYLIDIT   | -1.24 | 9  | 55.56 |
| prl_VIHIDOFEL   | -1.24 | 10 | 50.00 |
| prl_TOKEBONOD   | -0.15 | 7  | 57.14 |
| prl_DYHETIJAF   | 0.76  | 7  | 28.57 |
| prl_NYGYGUVIP   | 0.73  | 8  | 62.50 |
| prl_HIJEVEJAJ   | 0.76  | 13 | 30.77 |
| prl_FOBAWEVIZ   | 0.74  | 22 | 31.82 |
| prl_LYHALYWYF   | -0.6  | 11 | 36.36 |
| prl_BUJIVETON   | 0.8   | 10 | 30.00 |

---

---

|                |       |    |       |
|----------------|-------|----|-------|
| prl_GYFATULOT  | 0.76  | 14 | 35.71 |
| prl_LIMEJANIL  | 0.76  | 8  | 12.50 |
| prl_JIGOKAMEG  | 0.73  | 11 | 45.45 |
| prl_NYMULEWUN  | -1.23 | 12 | 33.33 |
| prl_NULOGUZYL  | 0.76  | 10 | 40.00 |
| prl_DUSYPOPAZ  | -0.6  | 7  | 71.43 |
| prl_HIJUSYPEZ  | -1.24 | 7  | 14.29 |
| prl_GUGYGYPPYS | -0.15 | 9  | 55.56 |
| prl_JYNATEZUK  | 0.46  | 7  | 28.57 |
| prl_HUFOTAHIN  | 0.76  | 13 | 46.15 |
| prl_HUHEHITEN  | -2.23 | 9  | 33.33 |
| prl_FOWYHOLOS  | 0.76  | 8  | 37.50 |
| prl_KEHIDIGIB  | -1.15 | 13 | 53.85 |
| prl_NIPEKOZYK  | -1.24 | 15 | 33.33 |
| prl_NYJWUNIG   | -1.15 | 12 | 75.00 |
| prl_HYPOBAWYZ  | 0.76  | 8  | 12.50 |
| prl_NUGEMEDYD  | -0.24 | 8  | 37.50 |
| prl_SAZAPYGEH  | 0.76  | 10 | 10.00 |
| prl_KEGEDENYN  | -0.24 | 12 | 41.67 |
| prl_VIWUBEMAK  | -0.12 | 7  | 57.14 |
| prl_LEMEJALYT  | -0.15 | 10 | 30.00 |
| prl_VYGAWUHAP  | 0.76  | 8  | 25.00 |
| prl_ZAFUKUFOF  | -0.2  | 8  | 62.50 |
| prl_WYSEWYFUK  | -1.24 | 8  | 50.00 |
| prl_PULYKYKAG  | -2.23 | 15 | 40.00 |
| prl_GIHOGINEK  | 0.8   | 9  | 33.33 |
| prl_DYBUTIWEZ  | -0.24 | 7  | 71.43 |
| prl_JIPYKIHAN  | -0.15 | 7  | 42.86 |
| prl_BYWESYSIB  | -0.24 | 13 | 38.46 |
| prl_POBEZAZYP  | -2.14 | 11 | 54.55 |
| prl_BESOWEFOD  | 0.76  | 12 | 66.67 |
| prl_ZAFUWALOB  | -1.24 | 9  | 11.11 |
| prl_NAZYNEKAD  | -1.26 | 17 | 23.53 |
| prl_WOBOZODEK  | -1.24 | 10 | 70.00 |
| prl_VENYKUFUW  | -1.04 | 12 | 41.67 |
| prl_PEFEMUSAT  | -1.54 | 8  | 50.00 |
| prl_LULAZASUW  | -0.24 | 9  | 66.67 |
| prl_JYLEGIFEG  | 0.73  | 9  | 66.67 |
| prl_MULUWYFEK  | 0.76  | 9  | 22.22 |
| prl_LUJYSOPOT  | -1.16 | 8  | 50.00 |
| prl_JOVEHYSIG  | -0.54 | 11 | 9.09  |
| prl_VIZEGOVOL  | -0.6  | 7  | 71.43 |
| prl_TADAGEBOW  | -2.14 | 11 | 63.64 |
| prl_DAJIVIFAS  | -2.2  | 11 | 54.55 |
| prl_TYZYNETAF  | -2.15 | 10 | 40.00 |
| prl_JEVUGOBAT  | -0.24 | 8  | 25.00 |
| prl_PABAWELOB  | 0.76  | 7  | 57.14 |
| prl_LUKUGAHUZ  | -2.53 | 7  | 42.86 |
| prl_KEHEGEVOT  | -0.24 | 9  | 22.22 |
| prl_WUJELEKEJ  | -1.24 | 8  | 75.00 |
| prl_TAJAWAFAN  | 0.76  | 12 | 50.00 |

---

---

|               |       |    |       |
|---------------|-------|----|-------|
| prl_FUNUGYFOW | −0.54 | 13 | 53.85 |
| prl_VIDAWOHIP | 0.76  | 8  | 75.00 |
| prl_BOVOVIZYV | −1.15 | 16 | 31.25 |
| prl_SOZIZOHOP | −0.24 | 9  | 22.22 |
| prl_HANYPIPYB | −1.16 | 10 | 50.00 |
| prl_BISOLAVOF | −2.24 | 8  | 50.00 |
| prl_WYKUFEPET | −1.23 | 10 | 30.00 |
| prl_WEMUTAPOD | −3.23 | 14 | 21.43 |
| prl_GIMOLOSJ  | −2.24 | 14 | 28.57 |
| prl_LYVEDAKEM | −2.53 | 8  | 25.00 |
| prl_NOVOBANET | −1.16 | 8  | 62.50 |
| prl_FENIJEMOD | −1.24 | 11 | 18.18 |
| prl_MYPIFYVEV | −1.24 | 15 | 66.67 |
| prl_WUSESOKAF | −0.17 | 10 | 20.00 |
| prl_DISATINUN | 0.88  | 11 | 63.64 |
| prl_DILUWUFUD | −0.24 | 7  | 71.43 |
| prl_WUVAHEHET | −0.24 | 7  | 28.57 |
| prl_NIWALYJYV | −2.15 | 10 | 60.00 |
| prl_PEVINOMOK | 0.76  | 11 | 45.45 |
| prl_VUMUKYGEK | −2.14 | 11 | 54.55 |
| prl_GELUVESAL | −0.2  | 7  | 71.43 |
| prl_HEHOHISUV | 0.76  | 10 | 40.00 |
| prl_DIZOLASAH | 0.76  | 10 | 30.00 |
| prl_DIMYWULYH | −0.24 | 10 | 20.00 |
| prl_POLYFYFAF | −0.04 | 9  | 33.33 |
| prl_PUGUFADAH | −3.44 | 22 | 40.91 |
| prl_JILISEWEP | −2.15 | 10 | 30.00 |
| prl_NEWENABYM | −0.15 | 17 | 29.41 |
| prl_KYWOKYJIV | −2.53 | 17 | 23.53 |
| prl_JUWEGUMIM | −2.14 | 13 | 15.38 |
| prl_FUNIWAMYL | −3.07 | 13 | 53.85 |
| prl_SAFOWUPEK | −0.24 | 7  | 57.14 |
| prl_WANYVEGOL | −1.24 | 14 | 28.57 |
| prl_BAVEVOWUN | 0.73  | 9  | 44.44 |
| prl_VOSIZYJUZ | 0.8   | 11 | 54.55 |
| prl_SUTETILYZ | −2.23 | 16 | 56.25 |
| prl_LOKYBENYM | −1.24 | 8  | 12.50 |
| prl_HAJYBILYM | −0.15 | 7  | 42.86 |
| prl_KAGYTAWEF | 0.76  | 9  | 44.44 |
| prl_KINYJYWOJ | −1.16 | 13 | 53.85 |
| prl_JELAWIFIV | −3.15 | 9  | 33.33 |
| prl_HIJAHOHOP | 0.85  | 11 | 54.55 |
| prl_KIMAVYGAG | 0.46  | 7  | 42.86 |
| prl_GUSYJAWOV | −4.19 | 12 | 8.33  |
| prl_DYSUDEPUN | 0.73  | 10 | 50.00 |
| prl_MONEJEMIW | 1.5   | 9  | 55.56 |
| prl_JEHOPUJAV | −1.15 | 12 | 66.67 |
| prl_BINYKYSAY | −0.26 | 7  | 57.14 |
| prl_KYHUTIKOL | −0.27 | 8  | 62.50 |
| prl_GAVAVUGYM | −0.04 | 10 | 50.00 |
| prl_LOBASIZAF | −1.51 | 7  | 42.86 |

---

---

|                |       |    |       |
|----------------|-------|----|-------|
| prl_DYLAGYDAT  | -0.26 | 8  | 62.50 |
| prl_GUVIVIEWEM | -2.23 | 10 | 20.00 |
| prl_SYJUFOHIM  | 0.76  | 10 | 40.00 |
| prl_DIZIGYWEP  | -2.53 | 18 | 38.89 |
| prl_DEMIHUHIF  | -2.26 | 9  | 33.33 |
| prl_JASOTABUG  | -2.23 | 11 | 27.27 |
| prl_LEGYTEGYB  | -0.2  | 12 | 41.67 |
| prl_SILOKIHES  | -1.2  | 13 | 38.46 |
| prl_NUHYVIFYS  | -1.24 | 11 | 27.27 |
| prl_WOGOVIUFAS | 0.73  | 13 | 53.85 |
| prl_NEKIKIBAP  | 0.79  | 9  | 77.78 |
| prl_VYZELYPAL  | -2.24 | 9  | 66.67 |
| prl_PEJYPYZEL  | -0.15 | 17 | 47.06 |
| prl_HAWIHYTIT  | -0.24 | 9  | 44.44 |
| prl_ZIMAKIHUG  | -2.23 | 7  | 28.57 |
| prl_MIMAHESOD  | 0.76  | 12 | 58.33 |
| prl_DONEMUNEW  | 0.8   | 11 | 81.82 |
| prl_NAMYZYKEZ  | -0.24 | 8  | 12.50 |
| prl_MUTESUFYL  | -2.24 | 7  | 42.86 |
| prl_NETALATAM  | -1.16 | 10 | 10.00 |
| prl_WUWUBIPEN  | -1.54 | 9  | 44.44 |
| prl_PYNITYMUH  | -2.24 | 23 | 43.48 |
| prl_ZUJISOZEL  | -0.6  | 7  | 28.57 |
| prl_GENEBAHUJ  | -1.24 | 14 | 42.86 |
| prl_KOZITYBEP  | -1.16 | 8  | 62.50 |
| prl_KYWASOSEW  | -0.15 | 8  | 37.50 |
| prl_KOSYGYBIZ  | -0.6  | 7  | 42.86 |
| prl_BUHEPUJYN  | -0.24 | 11 | 27.27 |
| prl_WABUFUDYN  | -0.15 | 13 | 53.85 |
| prl_HILUBEVIS  | -0.15 | 12 | 50.00 |
| prl_SAWIDYDUN  | -1.15 | 13 | 69.23 |
| prl_LAGOVEGYF  | -0.24 | 7  | 42.86 |
| prl_FAHOMALYV  | -0.45 | 11 | 45.45 |
| prl_NALILUBIN  | -1.16 | 9  | 11.11 |
| prl_SIGIBEKAN  | -2.23 | 13 | 53.85 |
| prl_WOMINEWEH  | -1.24 | 9  | 44.44 |
| prl_GIVASIZUZ  | -3.15 | 15 | 13.33 |
| prl_FAJYNUPEN  | -1.23 | 15 | 20.00 |
| prl_PIFOPYPOF  | -0.15 | 14 | 50.00 |
| prl_ZUJODUMEN  | 0.96  | 10 | 40.00 |
| prl_KYNOPESYF  | -2.23 | 13 | 7.69  |
| prl_GATIJJYP   | -2.17 | 27 | 33.33 |
| prl_KEDYTIGIT  | -0.24 | 13 | 23.08 |
| prl_WYZILEMEJ  | -1.24 | 9  | 33.33 |
| prl_PYFIDOWUM  | -0.24 | 13 | 15.38 |
| prl_GOMENEBUS  | -2.2  | 15 | 46.67 |
| prl_PONIVUVOK  | -1.24 | 9  | 55.56 |
| prl_TUFOSYKAW  | -1.2  | 9  | 55.56 |
| prl_KIKESUPEB  | -0.54 | 10 | 30.00 |
| prl_PAZOWETUZ  | -1.23 | 9  | 44.44 |
| prl_LAGUSANIF  | -0.24 | 7  | 28.57 |

---

---

|                |       |    |       |
|----------------|-------|----|-------|
| prl_MAPUGISIM  | -0.15 | 15 | 46.67 |
| prl_KUDEZYLOG  | 0.79  | 8  | 37.50 |
| prl_TEFOSYVUK  | 0.73  | 10 | 20.00 |
| prl_JUKEJAVYH  | -0.26 | 15 | 46.67 |
| prl_PAHYSILEK  | 0.79  | 16 | 31.25 |
| prl_BIKIVIHUM  | -2.23 | 8  | 25.00 |
| prl_JEHAWAGUJ  | -0.24 | 14 | 28.57 |
| prl_MUJALONUB  | 0.75  | 10 | 60.00 |
| prl_ZUHYLYVON  | -0.24 | 8  | 50.00 |
| prl_NOSEDOJOS  | -0.24 | 18 | 44.44 |
| prl_WAHISINYP  | -0.24 | 9  | 11.11 |
| prl_NYFITUBAH  | 0.76  | 14 | 35.71 |
| prl_PUWEPIMEH  | -1.16 | 7  | 28.57 |
| prl_BYZYBINIZ  | -0.24 | 7  | 57.14 |
| prl_ZUVESAWIF  | -0.27 | 7  | 42.86 |
| prl_PUJULIFYP  | -1.18 | 8  | 37.50 |
| prl_JYVEMEDYG  | 0.76  | 9  | 44.44 |
| prl_SOSAWAWAM  | -1.27 | 7  | 28.57 |
| prl_ZOWALAZAH  | -3.25 | 12 | 58.33 |
| prl_GYKUNOTEP  | -3.23 | 25 | 28.00 |
| prl_VEWIMOKYT  | 0.76  | 14 | 28.57 |
| prl_FEGYDYWIS  | -7.5  | 22 | 54.55 |
| prl_POVYVEPIW  | -1.24 | 11 | 18.18 |
| prl_DEMYHITOJ  | -0.54 | 8  | 37.50 |
| prl_HIVOFYMAZ  | -1.15 | 14 | 64.29 |
| prl_JUGEDUTEH  | -2.26 | 9  | 55.56 |
| prl_TABUBOTEJ  | -0.15 | 9  | 77.78 |
| prl_SAKOLIWYM  | -0.45 | 8  | 12.50 |
| prl_VOGUDYFEW  | -1.24 | 9  | 33.33 |
| prl_WAPISIFAN  | -0.27 | 7  | 57.14 |
| prl_PYHYPPAPAF | 0.76  | 15 | 46.67 |
| prl_KEWYLILIV  | -0.24 | 15 | 66.67 |
| prl_POGUZULIH  | -0.16 | 11 | 36.36 |
| prl_DIKAPOKYJ  | -0.15 | 10 | 40.00 |
| prl_TOZUZUKUP  | -0.24 | 10 | 50.00 |
| prl_PUVOTEZAT  | -2.16 | 7  | 42.86 |
| prl_TENAKAMUS  | -0.17 | 11 | 45.45 |
| prl_WUTASOLAB  | -2.23 | 9  | 33.33 |
| prl_WOKEBEHEB  | -1.24 | 10 | 30.00 |
| prl_ZIGIWABYH  | -2.24 | 12 | 41.67 |
| prl_WEJEGAHYD  | 0.76  | 7  | 42.86 |
| prl_FYJYKUZEP  | 0.76  | 8  | 50.00 |
| prl_VYJEWUKIB  | 0.85  | 7  | 42.86 |
| prl_DOZOHOLOK  | -1.2  | 7  | 14.29 |
| prl_ZYTOBIMIB  | -0.24 | 8  | 50.00 |
| prl_KYVUZUJOYV | -0.24 | 12 | 8.33  |
| prl_KYWUKEJEL  | 0.79  | 14 | 35.71 |
| prl_NUHUKEYSEL | -1.24 | 11 | 9.09  |
| prl_WEKIKAKUJ  | 0.05  | 15 | 33.33 |
| prl_GUFYKIPAG  | -0.15 | 8  | 50.00 |
| prl_LOKOPADIT  | 0.85  | 11 | 27.27 |

---

---

|               |       |    |       |
|---------------|-------|----|-------|
| prl_PEVOPILET | -2.23 | 12 | 58.33 |
| prl_NOTUSUTED | -0.2  | 10 | 40.00 |
| prl_NINIVYKYL | 1.75  | 34 | 35.29 |
| prl_HYMYTABIL | -0.26 | 13 | 46.15 |
| prl_HUZUHEGIZ | 0.73  | 9  | 44.44 |
| prl_MEJITEZIV | -1.16 | 7  | 57.14 |
| prl_FODYGOTAN | -0.24 | 8  | 37.50 |
| prl_FYHUVAMYS | 0.85  | 15 | 33.33 |
| prl_GELUPUTAF | -0.6  | 13 | 61.54 |
| prl_WIZYZYMIB | 0.76  | 11 | 54.55 |
| prl_SIKAKATYT | -0.27 | 9  | 77.78 |
| prl_MYNEBOVOW | -2.24 | 8  | 62.50 |
| prl_TEHIZILAN | -0.24 | 12 | 33.33 |
| prl_MEBYNUWAN | 1.76  | 16 | 62.50 |
| prl_PYVILILYD | -1.15 | 19 | 31.58 |
| prl_JETUTANOB | -1.24 | 14 | 50.00 |
| prl_NOBEGUDUK | 0.73  | 13 | 69.23 |
| prl_ZOFETEGAN | 0.76  | 9  | 44.44 |
| prl_POBUTEFOL | -0.17 | 11 | 18.18 |
| prl_JUDINOHYV | -0.07 | 7  | 28.57 |
| prl_GOHUWETAF | -2.15 | 20 | 50.00 |
| prl_DOHYHYWIM | -1.16 | 9  | 22.22 |
| prl_KUFOFIWYW | -0.24 | 8  | 50.00 |
| prl_WUBOLUHIS | -0.24 | 9  | 55.56 |
| prl_GEHYTULIS | -1.16 | 9  | 55.56 |
| prl_HOPOMIHUF | -0.07 | 18 | 50.00 |
| prl_GYGUVUVUN | -0.04 | 8  | 37.50 |
| prl_GUJYZEHUP | 0.76  | 9  | 33.33 |
| prl_WIJAPUSIT | 0.76  | 12 | 50.00 |
| prl_NONOHITAV | -0.6  | 7  | 42.86 |
| prl_WEKIMOJUV | -1.15 | 9  | 55.56 |
| prl_JIPEMIJYP | -2.16 | 13 | 38.46 |
| prl_FEHALEFUB | -0.24 | 14 | 21.43 |
| prl_NYBAKUNYL | -0.45 | 9  | 44.44 |
| prl_MEBOMUBOS | -1.15 | 10 | 60.00 |
| prl_BAWADEVUJ | -1.5  | 8  | 50.00 |
| prl_KIJANIGAK | 0.76  | 15 | 60.00 |
| prl_MEZOFUKOT | 0.76  | 13 | 15.38 |
| prl_NETUFUPEM | -3.26 | 20 | 55.00 |
| prl_FYWEWOLET | -0.27 | 14 | 35.71 |
| prl_WIBYHYFYZ | -1.26 | 18 | 33.33 |
| prl_KOZIDAWOP | -0.2  | 12 | 41.67 |
| prl_PUDOLOPUB | -0.24 | 16 | 18.75 |
| prl_ZEGEMUNEB | -1.15 | 9  | 55.56 |
| prl_ZUBYVIJYK | -1.54 | 11 | 54.55 |
| prl_PYLYBOWYL | 0.04  | 13 | 46.15 |
| prl_BIGEDETAH | -0.54 | 8  | 37.50 |
| prl_GAKIGAVOZ | -1.24 | 8  | 62.50 |
| prl_BEMEHUVIN | -2.14 | 14 | 50.00 |
| prl_ZUNEPYSIH | -1.16 | 7  | 57.14 |
| prl_FYTOTOJEG | -0.24 | 10 | 50.00 |

---



---

|                |       |    |       |
|----------------|-------|----|-------|
| prl_TYJEPOGOH  | −0.54 | 9  | 11.11 |
| prl_BYTAMYBYK  | −0.04 | 7  | 57.14 |
| prl_VABUBYWOT  | 1.73  | 11 | 45.45 |
| prl_JATUHETYG  | 0.8   | 12 | 66.67 |
| prl_KYLYHYVES  | −0.15 | 14 | 50.00 |
| prl_GESYFYWAL  | −0.24 | 8  | 25.00 |
| prl_JEFIDOTYH  | −0.2  | 10 | 50.00 |
| prl_DITOHAGUP  | −0.24 | 10 | 60.00 |
| prl_FANAPOVEJ  | −3.16 | 10 | 30.00 |
| prl_DYSUKEGEB  | −0.24 | 9  | 66.67 |
| prl_WAPUNIWYB  | −0.16 | 10 | 40.00 |
| prl_GEVAWOBIL  | −2.04 | 13 | 38.46 |
| prl_ZIFAVEGUM  | 0.76  | 7  | 42.86 |
| prl_SAKULAJED  | −2.45 | 10 | 40.00 |
| prl_DEMIFOWOK  | −1.24 | 11 | 27.27 |
| prl_WIZEMAKAL  | 0.76  | 11 | 54.55 |
| prl_BINOPAHUK  | −0.26 | 8  | 50.00 |
| prl_SOSIGYNUM  | −0.24 | 10 | 40.00 |
| prl_GAKUWYSAV  | 0.85  | 14 | 21.43 |
| prl_MAJIBEPEB  | −0.24 | 10 | 30.00 |
| prl_DYTESEKEH  | −1.24 | 7  | 71.43 |
| prl_WAWATOZUB  | −1.24 | 7  | 42.86 |
| prl_MEFADUZOF  | −1.24 | 7  | 57.14 |
| prl_SIMOTOJUS  | −0.24 | 18 | 22.22 |
| prl_VYKYNETUG  | 0.76  | 11 | 45.45 |
| prl_JEZYMAGES  | 0.76  | 8  | 62.50 |
| prl_DUZUNABIZ  | −0.54 | 15 | 20.00 |
| prl_WYTUZESUL  | −0.24 | 9  | 44.44 |
| prl_MEWYBUFYV  | −2.24 | 8  | 37.50 |
| prl_NIDAZAZAH  | −1.23 | 17 | 29.41 |
| prl_NYGYPEVAB  | −1.04 | 16 | 68.75 |
| prl_MIBATUWOD  | −1.2  | 8  | 62.50 |
| prl_SENEKANOL  | −0.24 | 11 | 36.36 |
| prl_NAZOLOBYP  | 0.76  | 9  | 44.44 |
| prl_VYKYSUTUJ  | 0.76  | 8  | 50.00 |
| prl_TEBIDUPES  | −0.24 | 10 | 50.00 |
| prl_FEBENYSYM  | −0.24 | 8  | 62.50 |
| prl_NAMOBIGET  | −3.23 | 24 | 29.17 |
| prl_MEZYKIZYW  | −2.54 | 18 | 33.33 |
| prl_HUZIPOVEH  | 0.73  | 7  | 57.14 |
| prl_BYMYGYSAL  | −1.21 | 10 | 70.00 |
| prl_MABOBIKUS  | −0.15 | 12 | 50.00 |
| prl_KATUFADAN  | −0.15 | 16 | 50.00 |
| prl_NALUMALUT  | 0.76  | 9  | 22.22 |
| prl_HYVOBYVIF  | −1.15 | 9  | 55.56 |
| prl_PIIHIHUDED | 0.76  | 14 | 50.00 |
| prl_ZIDAKATAF  | −0.24 | 8  | 50.00 |
| prl_JINYKIDAJ  | −1.25 | 10 | 50.00 |
| prl_BAMUZYFAD  | 0.73  | 13 | 46.15 |
| prl_NASIPOJOH  | 0.73  | 20 | 60.00 |
| prl_TEMAJAFYG  | −1.16 | 11 | 9.09  |

---

---

|               |       |    |       |
|---------------|-------|----|-------|
| prl_DAZUZYKEZ | −1.5  | 10 | 40.00 |
| prl_FOTIJIKEJ | −1.26 | 7  | 28.57 |
| prl_PAWOTEJIZ | −2.15 | 21 | 28.57 |
| prl_LASINUMAH | 0.82  | 7  | 71.43 |
| prl_PIMITOHUW | −0.24 | 7  | 42.86 |
| prl_TOZADIWES | 0.76  | 10 | 50.00 |
| prl_PEBOSYZYM | −1.24 | 7  | 42.86 |
| prl_HEKYPIDYN | −1.15 | 8  | 50.00 |
| prl_VELYKAPEZ | −0.04 | 7  | 85.71 |
| prl_HUZYJUSEN | −2.15 | 10 | 40.00 |
| prl_FAPOSYLEZ | −3.16 | 10 | 40.00 |
| prl_MYSYLAPAV | −1.24 | 10 | 40.00 |
| prl_TIVASASAV | 0.8   | 12 | 33.33 |
| prl_SUBONENAK | −0.9  | 9  | 22.22 |
| prl_SIHYHYWYV | −1.04 | 8  | 37.50 |
| prl_BYDUHENAT | 0.76  | 14 | 42.86 |
| prl_KIFEKIHAJ | −3.23 | 11 | 45.45 |
| prl_ZOBISEHEH | 0.46  | 13 | 53.85 |
| prl_ZAPIDOMUL | 1.73  | 9  | 44.44 |
| prl_NUJESAWIN | −0.08 | 8  | 37.50 |
| prl_DUPUFETOJ | −1.99 | 10 | 20.00 |
| prl_WYTOZASEH | −1.54 | 10 | 70.00 |
| prl_LOGYWITYT | 0.8   | 11 | 72.73 |
| prl_DESOGYBOG | 0.74  | 10 | 50.00 |
| prl_HOVATYBEV | 1.8   | 19 | 36.84 |
| prl_DYNOHIGYB | −0.27 | 9  | 55.56 |
| prl_DAHESIJS  | −0.54 | 13 | 38.46 |
| prl_TOHAZUFOT | 0.73  | 19 | 57.89 |
| prl_BOBUHIFYH | 0.76  | 8  | 25.00 |
| prl_SOVUMODEP | −0.27 | 13 | 53.85 |
| prl_MIBEWAGYW | −1.24 | 10 | 30.00 |
| prl_ZALUTEHAL | −0.24 | 7  | 57.14 |
| prl_TOSILISIF | −0.04 | 10 | 40.00 |
| prl_POKYNONUS | −0.27 | 14 | 42.86 |
| prl_KUPITOTAS | 0.76  | 14 | 35.71 |
| prl_BISYBYKUM | −1.26 | 11 | 45.45 |
| prl_BUZAMUSAM | 0.73  | 11 | 72.73 |
| prl_DYBEWOZYS | 0.85  | 18 | 38.89 |
| prl_LUWEHYHAT | 1.76  | 10 | 40.00 |
| prl_VOHEBOZEF | −2.15 | 12 | 58.33 |
| prl_ZEJOFIJAN | −1.16 | 15 | 40.00 |
| prl_WIBUKIPYS | −1.24 | 8  | 12.50 |
| prl_GYWYVOZUB | −0.2  | 8  | 25.00 |
| prl_KIVOAFET  | −0.24 | 7  | 42.86 |
| prl_VEBUNUTOM | −0.24 | 9  | 44.44 |
| prl_MAGENOSYZ | −0.24 | 9  | 44.44 |
| prl_JIZOSYZUT | −1.24 | 8  | 62.50 |
| prl_SUTEJOBWA | −0.04 | 10 | 50.00 |
| prl_WYGUZUMAS | 0.76  | 11 | 45.45 |
| prl_FOFAGOZUZ | −1.97 | 11 | 18.18 |
| prl_GUZUWOGEV | −1.15 | 13 | 38.46 |

---

---

|               |       |    |       |
|---------------|-------|----|-------|
| prl_ZOMYSOMON | -1.26 | 8  | 37.50 |
| prl_HITEGAMIN | -1.23 | 10 | 20.00 |
| prl_JASEKUGYV | -1.04 | 7  | 42.86 |
| prl_GYZELOMUF | -1.26 | 13 | 46.15 |
| prl_KAFOBUKOV | 0.76  | 9  | 44.44 |
| prl_VYHEBIBOZ | -1.2  | 8  | 62.50 |
| prl_WOWYFIMIM | -0.12 | 8  | 75.00 |
| prl_FYBEVEJYW | -0.24 | 9  | 22.22 |
| prl_NUHALABID | -1.24 | 14 | 35.71 |
| prl_TUDIZEKOT | -1.24 | 11 | 36.36 |
| prl_HAHOKOHYF | 1.76  | 9  | 55.56 |
| prl_BENUGENAD | -1.54 | 9  | 44.44 |
| prl_HITESOVYH | 0.76  | 10 | 40.00 |
| prl_ZEWIVYKOJ | 0.85  | 8  | 37.50 |
| prl_HATODOPIT | 0.8   | 20 | 20.00 |
| prl_JIKYGOPAF | -0.5  | 9  | 22.22 |
| prl_JEHUBIBAV | -1.15 | 9  | 33.33 |
| prl_LABEVABEB | -0.24 | 16 | 37.50 |
| prl_PISENETOV | -0.18 | 10 | 80.00 |
| prl_BEBOZELOT | 2.76  | 14 | 57.14 |
| prl_ZYZEFUHUH | -1.53 | 11 | 36.36 |
| prl_BOFUBEFYK | 0.76  | 11 | 18.18 |
| prl_JAPUVISUJ | -3.51 | 13 | 38.46 |
| prl_BYNOHIFEM | 0.79  | 7  | 57.14 |
| prl_KOWAGIGOW | 1.76  | 17 | 29.41 |
| prl_LANOMAKAZ | -1.24 | 7  | 57.14 |
| prl_FUSABYNUP | -0.24 | 9  | 55.56 |
| prl_NABYDYHYN | -1.18 | 9  | 66.67 |
| prl_TUGIPYFIL | -1.24 | 15 | 26.67 |
| prl_NEDUJAWOS | -0.24 | 7  | 28.57 |
| prl_WUHUPIJOS | -2.4  | 9  | 44.44 |
| prl_WAKAPINIL | -1.24 | 9  | 33.33 |
| prl_SUPAZITOV | 0.84  | 7  | 42.86 |
| prl_WEVEJIHAD | -2.24 | 13 | 15.38 |
| prl_DESEHIJOG | -2.54 | 12 | 25.00 |
| prl_KYLYJAFOP | -0.24 | 11 | 45.45 |
| prl_PUSEGAZEF | -2.6  | 13 | 15.38 |
| prl_SYZAFYZUJ | 0.76  | 13 | 38.46 |
| prl_TAKUGODYJ | 0.85  | 15 | 33.33 |
| prl_LOGIZITOG | -0.24 | 11 | 27.27 |
| prl_HYVONIMUB | -1.16 | 8  | 62.50 |
| prl_LEPYFAPUP | -0.24 | 12 | 50.00 |
| prl_MAWUBATAW | -0.24 | 9  | 44.44 |
| prl_VINULUJIJ | -2.24 | 11 | 36.36 |
| prl_MEPUNIJIL | -1.12 | 18 | 27.78 |
| prl_HADADOFET | 0.74  | 9  | 44.44 |
| prl_PYMEBUPEV | -2.23 | 7  | 28.57 |
| prl_PEMEWAGOG | -1.23 | 9  | 22.22 |
| prl_GOKAJEDEL | -2.24 | 21 | 23.81 |
| prl_MANINODYL | -1.24 | 13 | 46.15 |
| prl_NOKUVODOF | 0.96  | 15 | 40.00 |

---

---

|               |       |    |       |
|---------------|-------|----|-------|
| prl_JOKYBIFED | −3.03 | 12 | 25.00 |
| prl_DELABAKAB | 0.76  | 8  | 62.50 |
| prl_NEKEHAVYW | 0.73  | 18 | 44.44 |
| prl_FOPEBANAD | 0.8   | 12 | 83.33 |
| prl_PITIWYMAZ | −0.24 | 9  | 55.56 |
| prl_KUNAFYKEJ | −0.15 | 8  | 37.50 |
| prl_WEHUMYZIB | −0.15 | 9  | 55.56 |
| prl_NYJUTOLUK | 0.76  | 9  | 55.56 |
| prl_NOBETULIV | 1.76  | 11 | 63.64 |
| prl_WAPYNEWYW | 0.88  | 10 | 70.00 |
| prl_WOGOVDAN  | −2.14 | 18 | 50.00 |
| prl_HIZILOGOM | 0.05  | 7  | 42.86 |
| prl_GAGUMALAG | −1.15 | 11 | 72.73 |
| prl_DONIJEDOV | −0.24 | 14 | 28.57 |
| prl_TONELATUH | −0.24 | 8  | 62.50 |
| prl_ZUMAZYTAF | 0.4   | 12 | 50.00 |
| prl_TABOJYZUK | −1.26 | 12 | 8.33  |
| prl_HESYBOVYM | −1.24 | 8  | 50.00 |
| prl_PAVOSYNOS | 0.76  | 12 | 41.67 |
| prl_DYVIKUPOJ | −0.27 | 14 | 42.86 |
| prl_DUVYGIKIW | −2.16 | 8  | 50.00 |
| prl_MESUNIZAH | 0.76  | 11 | 36.36 |
| prl_HOJIDILYD | 0.76  | 10 | 40.00 |
| prl_NAMUHAPYG | −0.24 | 7  | 57.14 |
| prl_HYHYBEGAL | −3.26 | 9  | 66.67 |
| prl_VYGAVUGAW | −1.17 | 7  | 57.14 |
| prl_SAFETELAM | −5.53 | 15 | 20.00 |
| prl_GAVULODOS | −1.24 | 12 | 66.67 |
| prl_NYVOVALYL | 0.96  | 10 | 10.00 |
| prl_LEJUNUKEN | −0.54 | 7  | 42.86 |
| prl_GADEFIFID | −0.12 | 13 | 53.85 |
| prl_ZIJEMIHOT | −1.24 | 22 | 36.36 |
| prl_JOKYDOTUS | −0.15 | 12 | 50.00 |
| prl_JOBITYMYS | −0.24 | 9  | 33.33 |
| prl_TIJUMUDUT | −1.15 | 7  | 42.86 |
| prl_FENUZYNAS | 0.76  | 14 | 42.86 |
| prl_GATYJOMOM | −2.53 | 11 | 18.18 |
| prl_BYJANUDON | −2.23 | 7  | 14.29 |
| prl_NYNEGOPYD | −2.53 | 17 | 58.82 |
| prl_TAWIFAHAF | −2.16 | 10 | 30.00 |
| prl_KIKEVYJOL | −1.24 | 17 | 70.59 |
| prl_JAFYSUDIZ | −0.52 | 12 | 41.67 |
| prl_POLISIKOH | −0.24 | 22 | 31.82 |
| prl_GABUMITAT | −2.23 | 14 | 21.43 |
| prl_MOWIPUVUZ | −0.24 | 13 | 69.23 |
| prl_WOBYTOHYB | −0.2  | 7  | 14.29 |
| prl_VYLUHAHAV | 0.76  | 16 | 50.00 |
| prl_TALENUDOG | 0.76  | 7  | 14.29 |
| prl_NYGIHIWAS | −1.24 | 14 | 42.86 |
| prl_WEKAFEZED | −0.54 | 7  | 42.86 |
| prl_FEYJJIWYJ | 0.76  | 12 | 41.67 |

---

---

|               |       |    |       |
|---------------|-------|----|-------|
| prl_LEKOWAFIV | 0.46  | 11 | 9.09  |
| prl_DAHYTUPAP | 1.46  | 10 | 30.00 |
| prl_NYJAKYHIS | -1.45 | 15 | 40.00 |
| prl_BAGIBISUS | 0.76  | 12 | 33.33 |
| prl_GUGUFIHAH | -2.49 | 14 | 50.00 |
| prl_HYHOFAFIK | -2.14 | 14 | 21.43 |
| prl_SYHINYHIM | 1.76  | 10 | 30.00 |
| prl_GOSAZIVOP | -0.24 | 7  | 57.14 |
| prl_BOTAWULAV | 1.4   | 8  | 25.00 |
| prl_HITYGITET | -1.23 | 8  | 25.00 |
| prl_KULIPOBEF | -0.24 | 7  | 14.29 |
| prl_PYMYWOGOM | -1.54 | 20 | 30.00 |
| prl_LUTUHEPAD | 0.8   | 10 | 70.00 |
| prl_TAHIKYTUL | -0.24 | 10 | 30.00 |
| prl_DAPYFIJOJ | -1.27 | 10 | 50.00 |
| prl_WIJULOWEN | -0.24 | 7  | 28.57 |
| prl_WEHYTEVIG | -1.26 | 8  | 50.00 |
| prl_GOJIGIFEK | -0.18 | 10 | 80.00 |
| prl_MAVELOBOD | -0.24 | 8  | 62.50 |
| prl_JUPESABAF | -2.26 | 12 | 41.67 |
| prl_MEZOWESQJ | -1.24 | 14 | 78.57 |
| prl_GEHAPUGAF | 0.4   | 14 | 21.43 |
| prl_HALETADYN | 1.89  | 18 | 33.33 |
| prl_WITYFAHYS | -0.2  | 11 | 54.55 |
| prl_JOGEDINAB | -0.24 | 9  | 33.33 |
| prl_WIJIDYZEH | 0.73  | 7  | 42.86 |
| prl_VYSAPAWAM | -3.23 | 14 | 50.00 |
| prl_DYWAJOFYV | -0.51 | 10 | 10.00 |
| prl_ZAFOPYHUN | -0.26 | 14 | 50.00 |
| prl_HUDYNEKAD | 0.88  | 10 | 40.00 |
| prl_ZANAZIJIZ | 0.76  | 11 | 72.73 |
| prl_GYPOPAPEL | -1.15 | 10 | 60.00 |
| prl_KAPIGAGEN | 0.73  | 19 | 57.89 |
| prl_HOPAWAVUH | -1.24 | 18 | 44.44 |
| prl_LINYZIWED | -2.15 | 10 | 20.00 |
| prl_KEJYGIFEP | -1.2  | 14 | 28.57 |
| prl_MOVYSALUL | -0.24 | 11 | 27.27 |
| prl_GUJOBOKYH | -1.23 | 13 | 46.15 |
| prl_TENYGUNAL | -1.41 | 8  | 50.00 |
| prl_MUBISISOT | -1.24 | 13 | 15.38 |
| prl_KULONYLUS | -2.14 | 12 | 58.33 |
| prl_BAFILASYT | -1.23 | 17 | 23.53 |
| prl_VEBOLAGEP | -2.17 | 27 | 33.33 |
| prl_WOGOZUNAD | -0.24 | 7  | 57.14 |
| prl_NAHYJAHAT | -0.04 | 8  | 37.50 |
| prl_SYDAWOBAL | 0.76  | 14 | 42.86 |
| prl_HUKIHOGUJ | 0.46  | 11 | 36.36 |
| prl_LYBYBALUV | 0.76  | 10 | 60.00 |
| prl_JATOVYPUW | 0.76  | 8  | 37.50 |
| prl_MAWOMABAB | -1.45 | 13 | 15.38 |
| prl_MITOPIVYJ | -0.2  | 8  | 87.50 |

---

---

|               |       |    |       |
|---------------|-------|----|-------|
| prl_SODEKEHED | −1.24 | 10 | 40.00 |
| prl_PEBAMEFUM | −1.24 | 10 | 40.00 |
| prl_WELOGYBOZ | 0.73  | 11 | 45.45 |
| prl_LUHUDIVUG | −0.12 | 13 | 53.85 |
| prl_VYDOSAHYG | 0.76  | 7  | 28.57 |
| prl_KEBALIBYN | −0.24 | 8  | 37.50 |
| prl_TOLUBEVUM | −0.27 | 12 | 41.67 |
| prl_SISEPEBEL | 0.76  | 9  | 66.67 |
| prl_VUSAZUZES | 0.76  | 8  | 50.00 |
| prl_MEKOLEZYK | −0.15 | 11 | 45.45 |
| prl_LAGYDADOM | −1.51 | 10 | 30.00 |
| prl_VATAJISUP | −1.24 | 13 | 53.85 |
| prl_LAFATYTOM | 0.76  | 11 | 36.36 |
| prl_WADANOLEN | −0.24 | 8  | 50.00 |
| prl_BALEBUKEW | −1.18 | 9  | 22.22 |
| prl_LAGIFYFYT | −2.41 | 10 | 50.00 |
| prl_JEMONIGUF | −0.24 | 7  | 57.14 |
| prl_FUTEGYVIF | −0.25 | 16 | 43.75 |
| prl_HUMUJISYV | 0.73  | 11 | 54.55 |
| prl_DIGAMYKUP | −1.15 | 12 | 75.00 |
| prl_ZABYDUJOF | −0.24 | 17 | 29.41 |
| prl_LEKAHUGIB | −0.54 | 14 | 50.00 |
| prl_MOSONENUT | −0.6  | 10 | 50.00 |
| prl_BUBOFABUV | −0.24 | 8  | 12.50 |
| prl_SEJODOMAG | −2.15 | 8  | 25.00 |
| prl_KYHILULAB | −0.23 | 11 | 18.18 |
| prl_VUKUFOBIB | 0.04  | 9  | 33.33 |
| prl_NEFOFYKAF | −2.15 | 13 | 23.08 |
| prl_GALINESUL | −1.24 | 7  | 28.57 |
| prl_ZUVUDAGUH | −1.2  | 7  | 42.86 |
| prl_DOLYTOVUM | 0.73  | 8  | 62.50 |
| prl_ZIGYMAHEH | −1.26 | 15 | 26.67 |
| prl_POMISADYJ | −1.26 | 15 | 33.33 |
| prl_LIPUJVYP  | −2.23 | 9  | 44.44 |
| prl_TOWOHATIP | 0.74  | 20 | 30.00 |
| prl_LESOFUSAJ | 0.85  | 14 | 28.57 |
| prl_SUPAJOGAS | 0.76  | 11 | 27.27 |
| prl_MIMOVIBUG | −1.26 | 9  | 33.33 |
| prl_NUDEGAFYZ | −2.17 | 25 | 36.00 |
| prl_NUVAJUWIL | 0.79  | 10 | 30.00 |
| prl_NYHYKIFIB | −1.23 | 19 | 31.58 |
| prl_SOZASOZYV | −2.24 | 9  | 55.56 |
| prl_KOBISYZEL | −1.2  | 10 | 40.00 |
| prl_WIMEZAFAP | −3.53 | 16 | 25.00 |
| prl_JYGUHUZUP | −0.27 | 7  | 85.71 |
| prl_KESUGAGAZ | −0.15 | 16 | 25.00 |
| prl_BYTUPIVYN | 0.55  | 16 | 31.25 |
| prl_TUKAVAVUB | 0.76  | 8  | 62.50 |
| prl_GASOWITYN | −2.6  | 10 | 30.00 |
| prl_WYWIFIHOL | −0.26 | 14 | 42.86 |
| prl_MYDASOVYZ | −2.16 | 8  | 25.00 |

---

---

|                |       |    |       |
|----------------|-------|----|-------|
| prl_GAJAMOMIG  | −0.51 | 11 | 54.55 |
| prl_FOBETELP   | −1.26 | 13 | 38.46 |
| prl_VAJALUKUG  | −0.2  | 9  | 66.67 |
| prl_ZEDAKAVOS  | −0.24 | 12 | 33.33 |
| prl_SUMUHEDEJ  | −1.23 | 12 | 25.00 |
| prl_FODALYJAF  | 0.76  | 14 | 57.14 |
| prl_SOMOFYPYG  | 0.82  | 12 | 41.67 |
| prl_GOWIKAJOT  | 0.79  | 7  | 57.14 |
| prl_DENYNEVYN  | −1.15 | 9  | 66.67 |
| prl_DEZYDYWIS  | −1.23 | 13 | 46.15 |
| prl_GINOZEFYZ  | 0.96  | 13 | 30.77 |
| prl_MEDUKOLYH  | −2.19 | 10 | 50.00 |
| prl_JUJOMUWIK  | −1.16 | 8  | 50.00 |
| prl_HISOJELUW  | −1.15 | 10 | 30.00 |
| prl_GOGOSYNES  | 0.76  | 19 | 26.32 |
| prl_NOZYVOPAH  | −2.11 | 10 | 50.00 |
| prl_VOSUMIDAG  | −2.15 | 11 | 45.45 |
| prl_PUSIMEWAG  | 0.76  | 13 | 30.77 |
| prl_ZIHYTUBAP  | 0.73  | 13 | 46.15 |
| prl_VUTUSEKIW  | 0.76  | 7  | 42.86 |
| prl_TALIFEMED  | 0.76  | 9  | 66.67 |
| prl_BOJEDALYD  | −4.17 | 12 | 16.67 |
| prl_BANUDAMIW  | −0.24 | 12 | 91.67 |
| prl_LALAFUJIN  | −1.15 | 12 | 50.00 |
| prl_KOVIHUHYF  | −0.24 | 11 | 18.18 |
| prl_HEDOLOYZYG | −1.24 | 7  | 42.86 |
| prl_FITIVYDAB  | 0.49  | 29 | 34.48 |
| prl_TEGIBUWED  | −1.24 | 8  | 87.50 |
| prl_ZUJEVUZOM  | −1.24 | 12 | 50.00 |
| prl_DUHIVOWYP  | −1.16 | 8  | 75.00 |
| prl_SUFUWAMAM  | −0.2  | 11 | 27.27 |
| prl_GYVOJYMUW  | 0.76  | 12 | 25.00 |
| prl_BADIDUSYF  | −0.27 | 7  | 42.86 |
| prl_JYBUVESIJ  | −2.15 | 10 | 50.00 |
| prl_FYJYDEFOL  | −1.27 | 8  | 50.00 |
| prl_GEFUGOSOJ  | 0.76  | 7  | 42.86 |
| prl_LADUKIHEL  | −0.24 | 10 | 50.00 |
| prl_VUVILYPYN  | −0.11 | 13 | 38.46 |
| prl_TYSUGANIF  | 1.73  | 14 | 42.86 |
| prl_DUNITASUM  | −0.27 | 20 | 45.00 |
| prl_VOHYMUPUJ  | −0.18 | 7  | 28.57 |
| prl_DOTEKUZOT  | 0.73  | 17 | 58.82 |
| prl_TULOVONYL  | −3.23 | 13 | 23.08 |
| prl_DYTOSATOL  | −0.08 | 10 | 40.00 |
| prl_KYHIJYSAF  | −0.24 | 15 | 26.67 |
| prl_FYNOJOTIP  | −2.24 | 17 | 35.29 |
| prl_SOZULENAW  | 0.76  | 17 | 35.29 |
| prl_NYDADALOM  | 0.76  | 7  | 57.14 |
| prl_BUFEMOGEN  | −0.27 | 8  | 37.50 |
| prl_LONAGAGYM  | −1.16 | 11 | 18.18 |
| prl_JENUPITOB  | −1.24 | 9  | 33.33 |

---

---

|               |       |    |       |
|---------------|-------|----|-------|
| prl_VYVANESYM | −0.15 | 12 | 16.67 |
| prl_BIBYJEGOT | −1.24 | 14 | 42.86 |
| prl_TYSONEMAV | −1.24 | 12 | 41.67 |
| prl_NIPIJAGUS | −0.54 | 10 | 40.00 |
| prl_WYFOGUFYS | −5.23 | 35 | 28.57 |
| prl_VUWOKILEB | −0.15 | 7  | 42.86 |
| prl_FOSEGESUG | 0.73  | 12 | 50.00 |
| prl_ZEWUPAKIV | 0.46  | 9  | 44.44 |
| prl_VUGYFOVUS | 0.76  | 16 | 62.50 |
| prl_BUTABYKEF | −0.04 | 9  | 33.33 |
| prl_MUZYZYPOG | −0.08 | 19 | 31.58 |
| prl_GYHAHIDEM | −2.16 | 13 | 53.85 |
| prl_TYJYZILEM | −1.24 | 15 | 40.00 |
| prl_WYHYBIFOW | −0.15 | 10 | 40.00 |
| prl_DUHOJPIZ  | −2.24 | 12 | 16.67 |
| prl_WABILUBEK | 0.85  | 11 | 45.45 |
| prl_ZYPIDOVYM | 0.76  | 10 | 50.00 |
| prl_DIPYGOZAP | 0.76  | 11 | 45.45 |
| prl_TOVUDOPYT | −1.16 | 10 | 40.00 |
| prl_FEPUKEPIW | −1.24 | 11 | 27.27 |
| prl_KOJUWIBOP | 0.76  | 11 | 45.45 |
| prl_ZISYPAFAM | −2.15 | 11 | 45.45 |
| prl_BOTYLIJOB | 0.76  | 8  | 37.50 |
| prl_DUZOVIFOH | −2.14 | 8  | 37.50 |
| prl_VILUZIBOK | −0.26 | 16 | 31.25 |
| prl_VALIKAHIN | −1.24 | 13 | 30.77 |
| prl_PIZYLAMAJ | −0.15 | 16 | 43.75 |
| prl_WUHYNOGYS | −2.15 | 12 | 16.67 |
| prl_KAWOHYGAG | −2.24 | 12 | 16.67 |
| prl_VEVYNEZYW | −2.24 | 13 | 61.54 |
| prl_JIMELANYV | 0.76  | 13 | 38.46 |
| prl_ZALODAGAM | 0.76  | 10 | 30.00 |
| prl_BAFATUKYK | −1.26 | 14 | 35.71 |
| prl_FYWYLASAD | −1.53 | 11 | 36.36 |
| prl_PINUVUKEM | −0.2  | 7  | 57.14 |
| prl_SYLUPUDOG | −2.2  | 10 | 40.00 |
| prl_LOSYGIFID | −0.24 | 11 | 9.09  |
| prl_DOHENUPAF | −1.04 | 12 | 50.00 |
| prl_FUFELESIV | 0.76  | 12 | 16.67 |
| prl_GESAFETON | −0.15 | 28 | 39.29 |
| prl_ZYMAZAWYB | −2.24 | 7  | 42.86 |
| prl_ZYSOFOMAZ | −1.24 | 21 | 47.62 |
| prl_LELUNONYV | 0.76  | 9  | 44.44 |
| prl_MYVOLAPOG | −1.24 | 7  | 57.14 |
| prl_PIPODOFEB | −1.16 | 8  | 37.50 |
| prl_NYLUHINAT | 0.8   | 13 | 30.77 |
| prl_VUWYTOPOJ | −1.24 | 8  | 50.00 |
| prl_GIBOGELIN | −2.45 | 8  | 50.00 |
| prl_KYDINEFOV | −0.24 | 12 | 41.67 |
| prl_ZYBAPIPOS | −0.24 | 17 | 35.29 |
| prl_FULAHOJAB | −1.06 | 15 | 13.33 |

---



---

|               |       |    |       |
|---------------|-------|----|-------|
| prl_VUBYDASOJ | −0.24 | 14 | 50.00 |
| prl_SADYBELAB | −0.15 | 11 | 45.45 |
| prl_BUNYKYLOP | 0.46  | 9  | 55.56 |
| prl_JEWYLIJOT | −0.2  | 12 | 50.00 |
| prl_KANILASOG | −0.24 | 8  | 37.50 |
| prl_HIVIGIGOF | −0.24 | 15 | 46.67 |
| prl_BAWULYDOB | −0.24 | 10 | 40.00 |
| prl_BYMYJEBOV | −2.24 | 10 | 30.00 |
| prl_TOMYDALIK | −1.24 | 8  | 50.00 |
| prl_LYFEFUPOS | −2.23 | 12 | 16.67 |
| prl_JEDUGELAS | −3.23 | 22 | 59.09 |
| prl_ZUWIKAJEN | −0.2  | 20 | 25.00 |
| prl_WITABOZOJ | 0.76  | 11 | 45.45 |
| prl_PIHINISOP | −2.24 | 19 | 15.79 |
| prl_POHUFOKEM | −1.26 | 8  | 37.50 |
| prl_GEHIWUNAH | −1.26 | 10 | 30.00 |
| prl_HIZAFOTEB | −0.15 | 11 | 18.18 |
| prl_JEPEDEVOF | −0.27 | 7  | 57.14 |
| prl_FEJEZOPIM | −1.16 | 8  | 12.50 |
| prl_TEHEZIMEW | 1.76  | 8  | 25.00 |
| prl_NEVOGUSOB | −0.24 | 7  | 42.86 |
| prl_VUBABAKEB | −1.24 | 7  | 71.43 |
| prl_BAJUGOGAL | −0.24 | 9  | 22.22 |
| prl_KIDUHBES  | −2.23 | 8  | 25.00 |
| prl_PAPAWYKUZ | 0.38  | 28 | 50.00 |
| prl_BAHEGYPEW | 1.76  | 10 | 60.00 |
| prl_BOMONYMOP | −1.23 | 20 | 25.00 |
| prl_ZOSYJYJIP | −0.24 | 12 | 33.33 |
| prl_WIHYJEMUL | −0.26 | 12 | 50.00 |
| prl_VEDYGEZOP | −0.2  | 12 | 33.33 |
| prl_MIJATYPIM | 0.76  | 8  | 25.00 |
| prl_WUGANYVAT | −0.08 | 9  | 44.44 |
| prl_BEPLYGOK  | −0.12 | 12 | 58.33 |
| prl_MOLYZUHUK | −1.2  | 12 | 50.00 |
| prl_SUKAGINAG | −1.24 | 8  | 75.00 |
| prl_SAMOHYBUN | −1.54 | 8  | 75.00 |
| prl_ZYJALOLAG | 0.76  | 8  | 25.00 |
| prl_VUVEDODET | −1.12 | 9  | 55.56 |
| prl_BITAHAVYM | −0.24 | 14 | 28.57 |
| prl_WUGIVUWOL | −1.24 | 10 | 70.00 |
| prl_SAKAJISOJ | −1.15 | 13 | 69.23 |
| prl_GYHAGYJAK | −1.26 | 14 | 35.71 |
| prl_DAWELYTIT | −1.24 | 11 | 36.36 |
| prl_KYHEVUGYH | −1.24 | 9  | 44.44 |
| prl_VONUTAHOB | 0.76  | 11 | 54.55 |
| prl_FOLUBISUN | 0.93  | 10 | 50.00 |
| prl_ZULELAJID | −3.16 | 16 | 31.25 |
| prl_WUPIVAVIG | 1.89  | 18 | 33.33 |
| prl_NOFASOLAH | −0.23 | 14 | 28.57 |
| prl_HOTEUWUHD | 0.76  | 13 | 38.46 |
| prl_ZEJYJOVIK | 0.76  | 12 | 41.67 |

---

|               |       |    |       |
|---------------|-------|----|-------|
| prl_LUGIKYFUJ | 0.85  | 18 | 38.89 |
| prl_NUFOVAPEG | -3.23 | 9  | 55.56 |
| prl_TAVYBUHYJ | 0.76  | 13 | 61.54 |
| prl_NEKUPOLOH | -1.14 | 24 | 20.83 |
| prl_JIFIFEBUN | 0.79  | 7  | 57.14 |
| prl_WABILOFUN | -0.27 | 9  | 22.22 |
| prl_LYNIHIKOF | -2.15 | 20 | 25.00 |
| prl_WYVOFIWEH | 1.76  | 11 | 27.27 |
| prl_TYTAMOJEL | -0.15 | 7  | 57.14 |
| prl_WAZOBYJYB | -1.24 | 13 | 30.77 |
| prl_FUVOMOFAG | -0.04 | 10 | 50.00 |
| prl_HAWIFIVIN | -1.15 | 11 | 54.55 |
| prl_WAWUZUNYT | -1.54 | 14 | 28.57 |
| prl_FUHEJOSIF | -2.14 | 20 | 15.00 |
| prl_MEPIMOLOM | -0.24 | 15 | 40.00 |
| prl_KILYLYBYJ | -4.15 | 18 | 27.78 |
| prl_MOKUVUBUW | -3.19 | 14 | 57.14 |
| prl_NIWISOWEK | -2.23 | 12 | 50.00 |
| prl_TUMIDAKOM | 0.4   | 8  | 12.50 |
| prl_NYJYMIGUS | -2.11 | 12 | 58.33 |
| prl_PAGYDEDEJ | -3.16 | 8  | 25.00 |
| prl_JATUSANUS | -3.15 | 18 | 38.89 |
| prl_PEZAGEDIP | -1.26 | 18 | 33.33 |
| prl_HYJYJIMID | -1.15 | 11 | 54.55 |
| prl_MUZAMOMAB | -1.24 | 7  | 57.14 |
| prl_LIHYZUPAT | 0.76  | 12 | 41.67 |
| prl_DUGYBYFEV | -0.24 | 11 | 54.55 |
| prl_VIKAGAPYL | 0.96  | 7  | 71.43 |
| prl_MISUPYNYD | -1.24 | 7  | 57.14 |
| prl_JOZUPYMIP | 0.76  | 18 | 38.89 |
| prl_HAVODODYM | -1.16 | 22 | 40.91 |
| prl_BITUMIBAS | 1.79  | 15 | 20.00 |
| prl_NETEJASUT | 0.46  | 16 | 37.50 |
| prl_NEKYKYPOF | -2.16 | 14 | 35.71 |
| prl_FUNYZUBET | 1.79  | 8  | 50.00 |
| prl_PAZAFYFOG | -2.53 | 9  | 22.22 |
| prl_TYSAHAHEL | -0.27 | 10 | 60.00 |
| prl_NYMEBONOF | -1.24 | 7  | 42.86 |
| prl_KOTOZEKIT | -1.24 | 9  | 66.67 |
| prl_NYSYVELYZ | -0.15 | 13 | 30.77 |
| prl_NUKULIVAZ | -0.15 | 15 | 53.33 |
| prl_BIDILUVYH | -0.06 | 10 | 20.00 |
| prl_WYZAMYZYH | -1.2  | 16 | 25.00 |
| prl_JYVYPIPIN | -0.24 | 11 | 27.27 |
| prl_SIVAGYGIZ | -0.15 | 14 | 64.29 |
| prl_JALOWESAS | 0.76  | 10 | 50.00 |
| prl_GEFIJIPYB | -1.24 | 7  | 42.86 |
| prl_BIHYPYMET | -0.26 | 26 | 50.00 |
| prl_SAHEMINYN | -2.24 | 16 | 37.50 |
| prl_ZIPINIDOL | -0.15 | 8  | 50.00 |
| prl_HUTOJOWUV | -1.23 | 12 | 41.67 |

---

|               |       |    |       |
|---------------|-------|----|-------|
| prl_DUBATUWIT | -2.15 | 13 | 69.23 |
| prl_DOVOPIZYD | -3.15 | 19 | 15.79 |
| prl_PINIVAZYH | -2.24 | 12 | 58.33 |
| prl_HUBIDEPEZ | -1.15 | 18 | 22.22 |
| prl_SYFUVVOVB | 0.4   | 14 | 14.29 |
| prl_DOFYHULOL | 0.51  | 12 | 50.00 |
| prl_HUVUSOSIB | -1.24 | 11 | 54.55 |
| prl_TETALOGUB | -0.15 | 10 | 40.00 |
| prl_KADUGUFYB | 1.76  | 12 | 50.00 |
| prl_NOMOSIBOW | 0.96  | 15 | 40.00 |
| prl_TYLYHESIF | 0.76  | 15 | 20.00 |
| prl_PISOZEPYW | -0.2  | 12 | 58.33 |
| prl_LAVALILYD | -3.15 | 14 | 35.71 |
| prl_SUVIVOTIZ | -1.24 | 9  | 77.78 |
| prl_DOGIHADUT | -1.04 | 7  | 57.14 |
| prl_GALENEMOG | 0.96  | 15 | 40.00 |
| prl_JYBAKUPOZ | -0.54 | 10 | 40.00 |
| prl_PAWIJIZIN | 1.79  | 16 | 18.75 |
| prl_VUNAZALAV | -1.15 | 15 | 26.67 |
| prl_GEBOSAGAS | -3.53 | 15 | 20.00 |
| prl_PEPAFAMUK | -3.15 | 15 | 26.67 |
| prl_TYGOHOPIJ | -1.23 | 10 | 50.00 |
| prl_DIHIGUVAV | -1.24 | 8  | 50.00 |
| prl_LEBITAVUW | -1.24 | 9  | 22.22 |
| prl_DEWUHYPEF | -4.23 | 19 | 21.05 |
| prl_SUBIDULAJ | -1.15 | 7  | 42.86 |
| prl_DATEDYJIK | -2.24 | 8  | 37.50 |
| prl_SOJAZEYUK | -5.52 | 14 | 21.43 |
| prl_PIWESAGUD | -0.24 | 9  | 33.33 |
| prl_GINASAMUP | -1.24 | 12 | 25.00 |
| prl_WAHADUJYV | -1.2  | 8  | 50.00 |
| prl_LYLUNODIK | -0.15 | 11 | 45.45 |
| prl_JUFINOSUZ | -0.15 | 9  | 22.22 |
| prl_SENOVUVEW | 0.76  | 7  | 57.14 |
| prl_FODAPEPEB | -1.24 | 9  | 77.78 |
| prl_VOHEVIMYT | -1.15 | 10 | 70.00 |
| prl_MITAWAGAL | -0.12 | 7  | 42.86 |
| prl_TIJAJYHAV | -2.26 | 10 | 40.00 |
| prl_HYKAVUPUP | -1.24 | 11 | 45.45 |
| prl_SIFYMOBAT | -1.2  | 9  | 55.56 |
| prl_ZEPUGUNUN | -1.54 | 8  | 50.00 |
| prl_BULUZYGYV | 0.96  | 11 | 27.27 |
| prl_KUDAKEVEW | 0.76  | 13 | 61.54 |
| prl_HAZUZUHUN | -0.24 | 11 | 36.36 |
| prl_PUSOZAPEB | 0.76  | 10 | 30.00 |
| prl_PEGADEMUH | 0.82  | 10 | 30.00 |
| prl_KISYSINUL | -0.15 | 11 | 54.55 |
| prl_WATYNIGEZ | 0.76  | 10 | 40.00 |
| prl_GOBIFYSED | 0.76  | 10 | 70.00 |
| prl_LUZIVUVEL | -1.16 | 7  | 42.86 |
| prl_BENUHESAN | -1.15 | 18 | 16.67 |

---

---

|               |       |    |       |
|---------------|-------|----|-------|
| prl_SUKISIWOB | -1.24 | 21 | 28.57 |
| prl_NASATYBAK | -1.24 | 11 | 27.27 |
| prl_PUSAGEPEP | -0.26 | 12 | 25.00 |
| prl_DENIKYDEZ | -2.23 | 19 | 63.16 |
| prl_NEKIVAVEK | 2.76  | 13 | 38.46 |
| prl_HYLEFONAD | -0.24 | 10 | 20.00 |
| prl_DUBONEWUG | -2.24 | 20 | 40.00 |
| prl_BINUTENUG | -2.24 | 7  | 28.57 |
| prl_GYJADYFYG | -2.26 | 14 | 57.14 |
| prl_SEJIBAKYN | -0.16 | 9  | 44.44 |
| prl_PITEBOHAN | 0.76  | 11 | 54.55 |
| prl_VODYFEBAS | -0.26 | 18 | 44.44 |
| prl_POVIFALUN | -0.24 | 7  | 28.57 |
| prl_VYSYDUFES | 0.8   | 14 | 50.00 |
| prl_LAJOTIJUN | -0.45 | 14 | 85.71 |
| prl_NUGOMOZUF | 0.85  | 11 | 27.27 |
| prl_PEPUZUJOV | -1.23 | 12 | 16.67 |
| prl_JOGYPOVEB | -3.26 | 15 | 60.00 |
| prl_WUPEMYJYW | -2.2  | 16 | 25.00 |
| prl_HELATEDIK | -0.2  | 9  | 44.44 |
| prl_GEZIZULUN | -1.15 | 10 | 40.00 |
| prl_BONIJYJOZ | -0.15 | 11 | 45.45 |
| prl_TONULIGYT | -3.23 | 24 | 62.50 |
| prl_KADODYPUS | 0.76  | 7  | 57.14 |
| prl_MOLALAPYZ | -0.24 | 13 | 38.46 |
| prl_PILIMADIK | 0.76  | 18 | 22.22 |
| prl_BASUKYHIW | -1.54 | 9  | 66.67 |
| prl_PETAMOHYF | -0.16 | 10 | 40.00 |
| prl_GUTIFOBEN | -0.6  | 8  | 25.00 |
| prl_KAHEGUNEH | 0.76  | 7  | 57.14 |
| prl_VESAJAMOT | -1.15 | 12 | 50.00 |
| prl_TEWEDAJOS | 0.76  | 13 | 46.15 |
| prl_FYZOFUBOM | -1.15 | 12 | 41.67 |
| prl_TEKYDADAN | -0.6  | 13 | 46.15 |
| prl_VOBUVYDAB | -2.24 | 7  | 42.86 |
| prl_VUDIHUTIZ | 0.79  | 11 | 18.18 |
| prl_KYNEPILYF | -0.54 | 13 | 46.15 |
| prl_JYVUGIBUM | -0.15 | 16 | 31.25 |
| prl_MIPIJIDYL | -0.52 | 9  | 44.44 |
| prl_ZEBOBUFEM | -2.19 | 8  | 12.50 |
| prl_DAKYFAVUF | -2.23 | 10 | 30.00 |
| prl_JIDOLUHOB | -1.26 | 9  | 55.56 |
| prl_VYHYLIDUZ | 1.76  | 15 | 40.00 |
| prl_FIWINIFED | -0.2  | 7  | 71.43 |
| prl_JUZIWIGOP | -0.24 | 10 | 50.00 |
| prl_VASYNWAZ  | 1.73  | 9  | 55.56 |
| prl_VUGEADYZ  | 0.79  | 12 | 91.67 |
| prl_HOSIKYLON | 2.76  | 13 | 46.15 |
| prl_TIMENATAL | -0.2  | 7  | 14.29 |
| prl_GUNOBEPAN | 0.93  | 7  | 28.57 |
| prl_BYKEWEPYF | -2.23 | 13 | 23.08 |

---

---

|                |       |    |       |
|----------------|-------|----|-------|
| prl_TEKIMILIP  | -0.15 | 16 | 50.00 |
| prl_KUPUJOHUM  | 0.76  | 9  | 44.44 |
| prl_BESOHYNAF  | -0.21 | 10 | 30.00 |
| prl_PAKAKIHEF  | -2.15 | 11 | 54.55 |
| prl_WYZUMATUD  | 0.76  | 12 | 25.00 |
| prl_HAFOGUJOB  | -0.24 | 10 | 60.00 |
| prl_TAFYKUHYS  | -1.24 | 10 | 60.00 |
| prl_ZUSUKYBUH  | -1.26 | 8  | 62.50 |
| prl_HYZYHADAD  | 0.76  | 12 | 33.33 |
| prl_ZOKYPUPEB  | -2.15 | 14 | 57.14 |
| prl_ZONYBENYD  | 0.76  | 11 | 81.82 |
| prl_JUZYDUMAL  | -3.23 | 17 | 35.29 |
| prl_BESYLUZIV  | -2.23 | 8  | 12.50 |
| prl_KAWUWYPAS  | -2.04 | 15 | 26.67 |
| prl_HAWEKYTIB  | -1.54 | 7  | 42.86 |
| prl_LYDYKEVEG  | -1.24 | 10 | 50.00 |
| prl_LAVIZIBOL  | -2.24 | 10 | 30.00 |
| prl_FOKEPULUD  | 0.76  | 14 | 35.71 |
| prl_FUBETYHUT  | -0.15 | 11 | 27.27 |
| prl_PAWYNOSAZ  | -2.08 | 11 | 18.18 |
| prl_KAHYKESIF  | 0.96  | 12 | 50.00 |
| prl_VYGAHITYW  | -1.26 | 8  | 37.50 |
| prl_PAJYJYJUL  | -0.15 | 22 | 18.18 |
| prl_FIPIDUZOT  | 0.76  | 12 | 75.00 |
| prl_PATIFEGOV  | -1.16 | 20 | 30.00 |
| prl_HADIZYWOH  | 0.76  | 16 | 25.00 |
| prl_KAGIPAGED  | -1.5  | 15 | 66.67 |
| prl_KUNUWUJEG  | -0.24 | 13 | 15.38 |
| prl_JILETIVUL  | -1.24 | 14 | 50.00 |
| prl_MOPETANAL  | 1.8   | 22 | 18.18 |
| prl_FYPANOBIN  | -3.53 | 17 | 29.41 |
| prl_WITYWEZOJ  | -0.15 | 17 | 17.65 |
| prl_FUPAPESYW  | -0.18 | 11 | 27.27 |
| prl_JABYTYVOF  | -0.24 | 7  | 14.29 |
| prl_JISYTUBOZ  | -0.2  | 21 | 42.86 |
| prl_DUHANETAH  | 0.76  | 7  | 28.57 |
| prl_NEZOZUBYS  | -0.24 | 11 | 36.36 |
| prl_PEVIBADYV  | -0.24 | 9  | 44.44 |
| prl_DAHUHIISOV | 0.45  | 30 | 33.33 |
| prl_SOKETAJAT  | 0.76  | 15 | 46.67 |
| prl_GUBEKEKUH  | -0.24 | 8  | 37.50 |
| prl_BOBUSYTUH  | -0.54 | 9  | 44.44 |
| prl_LUGOPIFYF  | -0.24 | 10 | 50.00 |
| prl_VYGIDOZUF  | -1.24 | 11 | 18.18 |
| prl_FEKUWYDEW  | 1.76  | 9  | 55.56 |
| prl_VABYJYTUH  | -0.45 | 11 | 36.36 |
| prl_VESYDAKOL  | -0.16 | 12 | 33.33 |
| prl_NEKIBOGAM  | 0.73  | 11 | 63.64 |
| prl_ZYBEWYTOK  | -0.6  | 8  | 50.00 |
| prl_PEGYHINEZ  | 0.76  | 12 | 41.67 |
| prl_HEGYBOSEG  | 0.76  | 7  | 57.14 |

---

---

|               |       |    |       |
|---------------|-------|----|-------|
| prl_MIMEBETAM | −0.24 | 9  | 55.56 |
| prl_DIPANEPUB | −0.5  | 10 | 20.00 |
| prl_PUVUVUFYP | 0.76  | 11 | 9.09  |
| prl_LOWYHIHUZ | −0.24 | 9  | 55.56 |
| prl_WINAHANIF | −0.24 | 16 | 43.75 |
| prl_WIFIHEBOT | −0.15 | 7  | 42.86 |
| prl_JIKANUNYB | 0.76  | 8  | 37.50 |
| prl_TAHIFOZYK | −0.04 | 7  | 71.43 |
| prl_NYLEWOZUN | 1.76  | 13 | 46.15 |
| prl_JESEPESAZ | −1.24 | 13 | 46.15 |
| prl_FUKUMUFYW | 0.76  | 9  | 55.56 |
| prl_FABIJYDUT | −2.23 | 15 | 60.00 |
| prl_VUNYZOMYF | 0.46  | 11 | 27.27 |
| prl_HYDEWYPUW | −3.11 | 13 | 46.15 |
| prl_BUBIWUFAP | 0.76  | 12 | 58.33 |
| prl_JALAGUKUL | −0.24 | 7  | 57.14 |
| prl_TUFANAKOD | −1.24 | 8  | 25.00 |
| prl_VOVUVELIF | −0.24 | 10 | 30.00 |
| prl_PAHAHUSEK | 0.4   | 7  | 14.29 |
| prl_SEMYTEMAF | −0.18 | 9  | 55.56 |
| prl_DEPOLEZEJ | 0.46  | 8  | 25.00 |
| prl_JYFIBANES | −1.23 | 16 | 25.00 |
| prl_MONODESOK | 0.76  | 10 | 40.00 |
| prl_LEGUSUSUN | −1.6  | 9  | 33.33 |
| prl_TOLADEFOK | −0.16 | 8  | 50.00 |
| prl_KOHIHYWEL | −1.25 | 17 | 47.06 |
| prl_SOHEZUSIK | −1.54 | 8  | 50.00 |
| prl_NIMIJOWOT | −0.24 | 7  | 57.14 |
| prl_HOBYFOZAK | −0.26 | 11 | 36.36 |
| prl_KINYKIWOJ | −0.26 | 16 | 31.25 |
| prl_BUGALYSUV | 1.4   | 11 | 27.27 |
| prl_LAKYZIFAV | −0.24 | 10 | 10.00 |
| prl_GUTOZOPON | 0.76  | 8  | 62.50 |
| prl_SIHKEVUM  | 0.76  | 9  | 66.67 |
| prl_ZOGYKUZUJ | −0.24 | 12 | 50.00 |
| prl_HEZOMIKEL | −0.24 | 8  | 37.50 |
| prl_BINONENIW | 0.85  | 15 | 33.33 |
| prl_DYPUSUZEL | −0.24 | 8  | 25.00 |
| prl_NELATEGOL | −3.53 | 15 | 40.00 |
| prl_LULIJETAD | −2.53 | 11 | 27.27 |
| prl_JYJOGEMIT | 1.05  | 14 | 35.71 |
| prl_KYSEDOMAT | 0.85  | 14 | 57.14 |
| prl_JOHYWUTUJ | 0.76  | 9  | 55.56 |
| prl_WAHIMAFEH | −1.15 | 20 | 20.00 |
| prl_NINADODED | −0.15 | 8  | 50.00 |
| prl_GIVYDUDUG | −1.53 | 9  | 44.44 |
| prl_GATITOMYL | −0.24 | 13 | 53.85 |
| prl_WAKEJOFEG | −1.17 | 11 | 72.73 |
| prl_VYNUWUZYM | 0.96  | 17 | 41.18 |
| prl_SEVODUMUH | 0.73  | 7  | 42.86 |
| prl_FYVUHOBZ  | −0.18 | 18 | 50.00 |

---

---

|                |       |    |       |
|----------------|-------|----|-------|
| prl_WODASIVOZ  | -0.51 | 9  | 22.22 |
| prl_ZEKUMEVUJ  | -0.04 | 9  | 44.44 |
| prl_SEPEDEWEK  | 0.76  | 7  | 28.57 |
| prl_LYZOKIFEZ  | -0.27 | 10 | 40.00 |
| prl_FAMOFENIV  | -3.15 | 18 | 16.67 |
| prl_WONILOPEM  | -0.24 | 8  | 50.00 |
| prl_LIMUNUZUM  | -1.26 | 8  | 50.00 |
| prl_LAHUTUVUG  | -1.24 | 7  | 28.57 |
| prl_VEHAPUPIW  | -2.24 | 10 | 50.00 |
| prl_WYPEZAZYB  | -1.24 | 14 | 35.71 |
| prl_MUDOKELUW  | -0.54 | 9  | 66.67 |
| prl_LINEKOBOM  | -0.27 | 8  | 75.00 |
| prl_JYBYDUBUP  | -0.24 | 11 | 18.18 |
| prl_TEHITUWEZ  | -3.15 | 17 | 35.29 |
| prl BUMUFYZOL  | 0.96  | 17 | 41.18 |
| prl_GYMYDIKOZ  | 0.76  | 7  | 85.71 |
| prl_MEGOBEGEP  | -0.24 | 8  | 37.50 |
| prl_ZAJIGOWAG  | -1.54 | 13 | 53.85 |
| prl_LIVITUDYP  | -0.27 | 10 | 50.00 |
| prl_NOGABOVIZ  | -0.24 | 7  | 28.57 |
| prl_MIJAGOKYF  | -0.54 | 7  | 42.86 |
| prl_ZEZUMIGUF  | -3.53 | 7  | 14.29 |
| prl_KYFISEKAZ  | -0.24 | 11 | 63.64 |
| prl_FOMUGOFIS  | 0.85  | 11 | 63.64 |
| prl_LINODYWAL  | 0.55  | 16 | 31.25 |
| prl_WUHEFIDIM  | -0.24 | 11 | 54.55 |
| prl_FAJISYFAJ  | -0.24 | 13 | 38.46 |
| prl_HYNADUMON  | 0.96  | 17 | 47.06 |
| prl_MAVIFUMYH  | 0.76  | 9  | 44.44 |
| prl_MOKOWOTIF  | -0.15 | 7  | 71.43 |
| prl_WAJIBYLIH  | -1.04 | 9  | 11.11 |
| prl_LEJABUFYN  | -0.54 | 10 | 60.00 |
| prl_SEBOWUKED  | 1.76  | 9  | 33.33 |
| prl_SYKOMOVAJ  | -2.23 | 16 | 37.50 |
| prl_ZEWYHESUZ  | -0.27 | 7  | 28.57 |
| prl_WYKUHAJIM  | -1.54 | 8  | 62.50 |
| prl_BOKALIJYH  | 0.79  | 16 | 31.25 |
| prl_VIBUMETOM  | -0.24 | 8  | 50.00 |
| prl_KIFYMIHOH  | -0.54 | 9  | 55.56 |
| prl_FULAFADZAD | -0.2  | 7  | 42.86 |
| prl_WOKISEBOM  | -2.26 | 18 | 61.11 |
| prl_NIWEJUWYL  | -2.45 | 11 | 18.18 |
| prl_BOTAGIDUZ  | -0.07 | 8  | 50.00 |
| prl_GOGEBUHIH  | 0.73  | 7  | 71.43 |
| prl_FAGOPYTEW  | -1.45 | 16 | 37.50 |
| prl_DUFEJIDUB  | 0.76  | 7  | 28.57 |
| prl_DYPABYDIW  | -0.2  | 7  | 14.29 |
| prl_LEKENUBUJ  | -1.26 | 7  | 57.14 |
| prl_TEMYHAMUF  | -2.23 | 10 | 40.00 |
| prl_BAZOVEPIN  | -1.5  | 9  | 44.44 |
| prl_GEGENOHEH  | -1.6  | 13 | 69.23 |

---

---

|               |       |    |       |
|---------------|-------|----|-------|
| prl_BIFUPOJOZ | −2.2  | 10 | 50.00 |
| prl_FODIMAZAN | −0.16 | 9  | 33.33 |
| prl_WAHEKYHUM | −0.24 | 10 | 30.00 |
| prl_GIBYNADOM | −3.23 | 23 | 65.22 |
| prl_VALUVUHYF | 0.8   | 8  | 37.50 |
| prl_GULAZYLOV | −0.24 | 7  | 57.14 |
| prl_LEHUTOSAF | 0.76  | 8  | 50.00 |
| prl_PUWALYTEM | 0.73  | 10 | 60.00 |
| prl_DIFEZUMIT | −0.45 | 10 | 30.00 |
| prl_VOVEDYDUB | 0.77  | 13 | 23.08 |
| prl_DINEPOZEN | 0.76  | 14 | 35.71 |
| prl_NININASUB | 0.76  | 9  | 77.78 |
| prl_GOWOWOFUL | −4.53 | 15 | 26.67 |
| prl_HEGYVOKOZ | −0.12 | 12 | 58.33 |
| prl_KIPOHOHIB | −1.16 | 12 | 16.67 |
| prl_VOTIFYZYV | −2.16 | 7  | 28.57 |
| prl_TYVIHOZOP | −1.24 | 27 | 22.22 |
| prl_VAKIBAMYB | 0.5   | 8  | 50.00 |
| prl_PAKEGUPEZ | −0.6  | 8  | 62.50 |
| prl_NIKYJULUF | −3.23 | 11 | 27.27 |
| prl_NEBOHYDEW | −0.24 | 7  | 28.57 |
| prl_VAJYBIMIP | −0.15 | 13 | 53.85 |
| prl_PELUKUNYM | −3.14 | 24 | 16.67 |
| prl_MEMAVYBOP | 0.49  | 7  | 57.14 |
| prl_ZUDIPELUB | −0.15 | 7  | 42.86 |
| prl_VISEFYKUK | −0.15 | 13 | 53.85 |
| prl_WAZAWOHIG | 0.85  | 12 | 16.67 |
| prl_BUKUPOBUH | −0.15 | 8  | 50.00 |
| prl_WAMUDUJAG | −0.54 | 8  | 50.00 |
| prl_DUTABOZEM | −1.24 | 14 | 50.00 |
| prl_BASIGAGAW | −0.24 | 13 | 61.54 |
| prl_LOKUBUNEH | −0.26 | 7  | 71.43 |
| prl_ZAPYDUBYF | −1.24 | 8  | 12.50 |
| prl_PUHUPUZYU | −0.2  | 13 | 46.15 |
| prl_PUDEGOKEL | −3.23 | 9  | 33.33 |
| prl_VIZUFUGAZ | −0.21 | 7  | 42.86 |
| prl_KESILYTEL | −1.95 | 18 | 61.11 |
| prl_DUMYBAFOP | −1.15 | 10 | 30.00 |
| prl_JYNYMOZYD | −0.24 | 8  | 37.50 |
| prl_LOLIPUJUP | 1.74  | 18 | 44.44 |
| prl_MUHINOVII | 0.76  | 7  | 28.57 |
| prl_SYSOGYDUS | −0.21 | 9  | 22.22 |
| prl_PALETUSYD | −0.54 | 9  | 44.44 |
| prl_FEJYMUNIK | −2.16 | 15 | 53.33 |
| prl_HIPEGILUS | 0.76  | 13 | 30.77 |
| prl_TISEPOBAS | −1.24 | 12 | 16.67 |
| prl_LYZYJYPOM | 0.73  | 14 | 42.86 |
| prl_HOBEMYPPS | 0.73  | 7  | 42.86 |
| prl_BYFINAHUH | −1.15 | 17 | 23.53 |
| prl_TEJYJYDYZ | −0.24 | 13 | 38.46 |
| prl_HEDATAVOK | −1.15 | 21 | 19.05 |

---



---

|               |       |    |       |
|---------------|-------|----|-------|
| prl_DIFIMYPYB | −0.15 | 13 | 53.85 |
| prl_BUBYBUZYV | −0.15 | 15 | 53.33 |
| prl_DOFYHYMAB | −0.45 | 9  | 44.44 |
| prl_KIKYFATOB | −1.24 | 13 | 38.46 |
| prl_WUVOTAGYK | −3.16 | 8  | 25.00 |
| prl_HUBILYHIF | 0.05  | 7  | 28.57 |
| prl_WYTUHEHOB | 0.8   | 12 | 58.33 |
| prl_DASOHIVOS | −1.15 | 13 | 76.92 |
| prl_MASUPUHUG | −3.16 | 20 | 25.00 |
| prl_BAMEVESEP | −0.24 | 8  | 87.50 |
| prl_BIBEDYGUZ | −1.24 | 8  | 37.50 |
| prl_JAZUHAKYW | −1.24 | 12 | 33.33 |
| prl_GUMYFOJUP | −0.24 | 9  | 44.44 |
| prl_NEFOHETEH | −2.26 | 12 | 50.00 |
| prl_MENEWFON  | −3.53 | 12 | 33.33 |
| prl_DYMUGYFAW | −1.12 | 20 | 35.00 |
| prl_KYZYBEZOK | −2.04 | 7  | 42.86 |
| prl_SEVOVYGEG | 0.5   | 7  | 71.43 |
| prl_HUGITESYB | −0.54 | 7  | 57.14 |
| prl_GAJYDOSAB | −0.18 | 20 | 50.00 |
| prl_DASUMYVEW | −0.15 | 20 | 20.00 |
| prl_GEMAJYZAN | 0.4   | 8  | 62.50 |
| prl_VISEVOKUH | −0.26 | 7  | 57.14 |
| prl_VONUFOZUH | −1.15 | 12 | 75.00 |
| prl_NYKYDINOB | −3.16 | 8  | 50.00 |
| prl_SATEMIJEF | −0.15 | 12 | 58.33 |
| prl_WOLAMYLOL | 0.76  | 9  | 22.22 |
| prl_BIMALONAV | −2.17 | 7  | 57.14 |
| prl_JEPAMUFYV | −0.24 | 7  | 28.57 |
| prl_HYMIPAKYL | −1.26 | 11 | 54.55 |
| prl_VAVAZOFOW | 0.96  | 9  | 22.22 |
| prl_NUKYDOHYN | −0.24 | 8  | 37.50 |
| prl_BULONUJAK | −2.26 | 7  | 57.14 |
| prl_MYKALOJEJ | −0.15 | 17 | 41.18 |
| prl_TEMAVASEM | −2.23 | 11 | 45.45 |
| prl_LUBYKAKIM | −0.04 | 9  | 22.22 |
| prl_KAKATYVEW | −2.23 | 8  | 37.50 |
| prl_TIDODINIZ | 0.73  | 21 | 57.14 |
| prl_HELUWUZUV | −1.04 | 8  | 50.00 |
| prl_PIBAPUJIV | −0.15 | 11 | 45.45 |
| prl_ZATYMODYB | −3.23 | 22 | 27.27 |
| prl_FEGOMOTYS | 0.76  | 19 | 42.11 |
| prl_GUBETOPEB | −2.24 | 10 | 50.00 |
| prl_LUWITUWYW | −0.24 | 11 | 45.45 |
| prl_PIVYGEFEN | −0.24 | 7  | 57.14 |
| prl_GUGILOZAD | 0.76  | 9  | 22.22 |
| prl_SIHUHOHEN | 0.55  | 13 | 23.08 |
| prl_NYSOTOJYH | −0.24 | 7  | 28.57 |
| prl_FUZYKUKEF | −0.6  | 8  | 75.00 |
| prl_MEDYGUSUT | −1.5  | 7  | 57.14 |
| prl_JAZOTOGAH | −1.24 | 10 | 50.00 |

---

---

|                |       |    |       |
|----------------|-------|----|-------|
| prl_SALOTEZYD  | -2.44 | 17 | 35.29 |
| prl_WEZINUDIT  | -1.26 | 12 | 41.67 |
| prl_ZOBYGIMAJ  | -0.54 | 11 | 36.36 |
| prl_PYDOHIMYS  | -1.53 | 13 | 38.46 |
| prl_NEPOVIWUV  | -1.24 | 9  | 55.56 |
| prl_JYBYWAFAG  | -1.24 | 9  | 66.67 |
| prl_BYLULEVAW  | -0.08 | 12 | 33.33 |
| prl_ZINUZOKAJ  | 0.8   | 12 | 50.00 |
| prl_NENUJEDUJ  | -0.21 | 7  | 42.86 |
| prl_DYGOBOWOG  | -0.15 | 12 | 50.00 |
| prl_WOJYMOPUB  | -0.24 | 11 | 63.64 |
| prl_MEDIJOWAG  | -0.24 | 10 | 40.00 |
| prl_HEBYFETON  | -2.24 | 11 | 27.27 |
| prl_TAZYVYKUN  | 0.76  | 10 | 40.00 |
| prl_FYKEKAPOG  | -0.15 | 11 | 54.55 |
| prl_NAGOJOPUF  | -0.26 | 11 | 54.55 |
| prl_PEDIBONUZ  | -0.24 | 11 | 27.27 |
| prl_DYDAGAHOH  | -0.24 | 12 | 25.00 |
| prl_TOKAKUKAT  | -1.16 | 14 | 35.71 |
| prl_SUFANUTUS  | 0.76  | 12 | 50.00 |
| prl_KIKIWONIG  | -0.24 | 19 | 31.58 |
| prl_JEDISOHUG  | -1.24 | 15 | 53.33 |
| prl_PENOTAJAP  | 0.76  | 11 | 18.18 |
| prl_KELEKITOW  | -0.12 | 16 | 56.25 |
| prl_TEKOFADIV  | -2.15 | 10 | 40.00 |
| prl_VEKINEWEV  | -1.15 | 10 | 30.00 |
| prl_JOFOVEBIV  | 0.76  | 21 | 42.86 |
| prl_DYTYBEGYM  | 0.88  | 12 | 33.33 |
| prl_JOFAPODED  | -1.24 | 11 | 45.45 |
| prl_KEZETEOB   | -0.24 | 15 | 53.33 |
| prl_ZALUHYLOF  | -0.24 | 12 | 25.00 |
| prl_VAMOVUDUJ  | -1.24 | 12 | 58.33 |
| prl_KUGYLYFEW  | -0.45 | 11 | 45.45 |
| prl_ZAPUNELAS  | -1.16 | 14 | 21.43 |
| prl_HAHOHODAD  | 0.76  | 9  | 66.67 |
| prl_NAVIGELAW  | -0.24 | 8  | 12.50 |
| prl_KALUPOWOV  | -2.16 | 13 | 38.46 |
| prl_ZYSAZEBAH  | -0.2  | 10 | 40.00 |
| prl_DUPATUZES  | -1.23 | 10 | 50.00 |
| prl_FAMOKOGUD  | -0.24 | 11 | 36.36 |
| prl_DYLIUWEN   | -2.24 | 10 | 40.00 |
| prl_KYMILATAZ  | -1.23 | 7  | 28.57 |
| prl_VUVEKIHEJ  | -1.24 | 7  | 57.14 |
| prl_TYJAPELAS  | -1.15 | 13 | 30.77 |
| prl_DOSYVEPUM  | 0.76  | 14 | 50.00 |
| prl_DIJUIJOTOS | 0.76  | 9  | 77.78 |
| prl_BINEPULEJ  | -2.54 | 11 | 27.27 |
| prl_HIWUMUSAK  | -0.24 | 15 | 46.67 |
| prl_HYNYSUMYS  | -0.24 | 8  | 37.50 |
| prl_BANYFOFYZ  | 1.46  | 8  | 25.00 |
| prl_ZOVEPOVAT  | -0.54 | 10 | 10.00 |

---

---

|                |       |    |       |
|----------------|-------|----|-------|
| prl_HUNINEZUK  | −0.15 | 12 | 41.67 |
| prl_WUJIPYNEK  | −1.24 | 8  | 37.50 |
| prl_MIWEKUVUS  | 0.76  | 12 | 16.67 |
| prl_FUKUZYSUH  | 0.76  | 7  | 42.86 |
| prl_BOSYVEWAN  | −0.16 | 11 | 36.36 |
| prl_DOKALYSIZ  | 0.76  | 8  | 37.50 |
| prl_VENUPYFUH  | −0.18 | 9  | 55.56 |
| prl_MUWEDOCHAN | −1.16 | 10 | 50.00 |
| prl_SUDOPIKOV  | −0.25 | 15 | 60.00 |
| prl_WAMIPUDYL  | −0.24 | 19 | 21.05 |
| prl_PUJYMAFOL  | −0.23 | 15 | 46.67 |
| prl_ZIHITWED   | −0.15 | 15 | 46.67 |
| prl_HISEPUSEF  | −2.23 | 13 | 61.54 |
| prl_GONEDOPOV  | −0.24 | 10 | 30.00 |
| prl_NAGUTGUB   | 0.96  | 8  | 12.50 |
| prl_LOZASOJUI  | −2.24 | 9  | 33.33 |
| prl_PYWIBUJUI  | 0.85  | 17 | 23.53 |
| prl_ZOWIZIZAP  | −2.15 | 8  | 37.50 |
| prl_BADYTANUH  | 0.76  | 7  | 42.86 |
| prl_KIKEDEBYV  | −0.26 | 12 | 66.67 |
| prl_SOTEPUTET  | 0.79  | 16 | 31.25 |
| prl_BAVEDALUH  | −0.24 | 12 | 41.67 |
| prl_PIDUFYMUH  | −0.26 | 12 | 25.00 |
| prl_FULIBOTID  | −1.24 | 9  | 66.67 |
| prl_FISUWYLYN  | −2.45 | 19 | 47.37 |
| prl_BYWIHEJEP  | −1.23 | 11 | 18.18 |
| prl_JUMIMEMEN  | −1.15 | 13 | 15.38 |
| prl_LOSUSYLAW  | −3.51 | 11 | 45.45 |
| prl_VOHILASOV  | −1.15 | 14 | 28.57 |
| prl_VUZAMULIK  | −0.24 | 10 | 50.00 |
| prl_TYHAWAFAP  | −1.15 | 12 | 25.00 |
| prl_MYGOTAFIV  | −0.24 | 10 | 30.00 |
| prl_KYFEPOVIL  | −2.15 | 17 | 23.53 |
| prl_KUGOHYWIF  | −0.24 | 16 | 31.25 |
| prl_HYLIMUNAN  | 1.76  | 8  | 12.50 |
| prl_SANAVONID  | −2.11 | 12 | 66.67 |
| prl_WYFOPIJAP  | −3.26 | 11 | 18.18 |
| prl_LYZONYDUK  | −0.24 | 8  | 62.50 |
| prl_DYVADYDYJ  | −0.25 | 12 | 58.33 |
| prl_JYJYZABOH  | −1.2  | 14 | 28.57 |
| prl_SUNOVOGUF  | 0.05  | 10 | 50.00 |
| prl_TEBYPOBAS  | −1.24 | 15 | 26.67 |
| prl_SUBIKAPET  | 0.76  | 14 | 50.00 |
| prl_NYWOJUMYL  | −2.26 | 24 | 45.83 |
| prl_JYHITONUF  | −2.15 | 8  | 37.50 |
| prl_MEZUHUDYD  | −0.26 | 11 | 63.64 |
| prl_SIWEFUMID  | −3.25 | 15 | 33.33 |
| prl_TAZEGABOG  | −0.24 | 7  | 28.57 |
| prl_KADUFYKEF  | −2.15 | 10 | 20.00 |
| prl_DODUTIGUD  | −0.12 | 8  | 25.00 |
| prl_DILESOGIL  | −1.26 | 18 | 44.44 |

---

---

|                |       |    |       |
|----------------|-------|----|-------|
| prl_JEZOMUFOV  | -2.04 | 9  | 66.67 |
| prl_SEFOJYTAF  | 0.4   | 10 | 30.00 |
| prl_ZUMIWIWEM  | 0.85  | 15 | 20.00 |
| prl_PADELAMOB  | 0.76  | 7  | 28.57 |
| prl_NEZONAJEZ  | -0.04 | 8  | 75.00 |
| prl_LUKOWYFON  | -1.24 | 9  | 22.22 |
| prl_VUWIGUWEJ  | -0.24 | 9  | 88.89 |
| prl_PEPUVAMUD  | 0.04  | 9  | 33.33 |
| prl_KUHIKYFYB  | -0.26 | 10 | 40.00 |
| prl_SUTOTIFAS  | -2.24 | 18 | 16.67 |
| prl_KOMEFENEJ  | -1.24 | 8  | 50.00 |
| prl_JUFOTENIK  | 0.4   | 7  | 28.57 |
| prl_FIKAMINUD  | -2.16 | 16 | 25.00 |
| prl_ZIGUKEJYJ  | 0.85  | 14 | 21.43 |
| prl_ZADABUKYW  | 0.76  | 7  | 14.29 |
| prl_TEJEFEMUW  | 0.5   | 7  | 42.86 |
| prl_BIZEGUBEW  | -0.24 | 10 | 20.00 |
| prl_TASANUTOL  | -1.5  | 13 | 7.69  |
| prl_DOWAKIZIW  | -1.24 | 11 | 45.45 |
| prl_DEKYHUTYF  | -0.24 | 12 | 41.67 |
| prl_WYDAJONEZ  | -0.24 | 14 | 50.00 |
| prl_KALELEHAZ  | -0.24 | 7  | 42.86 |
| prl_WEDIMAHET  | -7.05 | 14 | 21.43 |
| prl_NYKUZOBYW  | -1.23 | 10 | 40.00 |
| prl_KEBUSYZEG  | 0.85  | 15 | 40.00 |
| prl_LEJODASIT  | 0.76  | 8  | 87.50 |
| prl_SISAVYKYW  | -0.51 | 15 | 33.33 |
| prl_DIHESUMID  | -2.23 | 13 | 53.85 |
| prl_GOKYHYPAP  | -0.5  | 12 | 58.33 |
| prl_MOVONIJYS  | -1.54 | 12 | 41.67 |
| prl_WAHILYWOP  | 0.76  | 11 | 54.55 |
| prl_BUKYLOFYP  | -1.2  | 7  | 57.14 |
| prl_KUNEKINUN  | -0.12 | 12 | 33.33 |
| prl_MUMEKOBEP  | -0.24 | 10 | 50.00 |
| prl_SYJODUVEG  | -0.24 | 10 | 40.00 |
| prl_ZOVAZADEJ  | -2.24 | 16 | 18.75 |
| prl_TASITUZUN  | -1.18 | 15 | 40.00 |
| prl_ZYSYKYZYG  | -2.2  | 12 | 58.33 |
| prl_MENOGUNEJ  | -0.24 | 7  | 57.14 |
| prl_VEJOMIPAK  | 0.73  | 17 | 41.18 |
| prl_HIJAVITUM  | -0.15 | 11 | 18.18 |
| prl_HEWUVOVUZ  | -0.06 | 9  | 22.22 |
| prl_TETUVUNIT  | 0.76  | 8  | 50.00 |
| prl_SUVIJISIL  | -0.5  | 8  | 37.50 |
| prl_ZOPYKAHIB  | -1.24 | 13 | 23.08 |
| prl_KUKUNOWOH  | -0.27 | 8  | 50.00 |
| prl_LUJIDOKUL  | -0.6  | 16 | 68.75 |
| prl_ZELILYPYK  | 0.85  | 11 | 36.36 |
| prl_HIZEJYMEG  | -1.23 | 12 | 33.33 |
| prl_ZIKOZIHAAH | -2.24 | 14 | 21.43 |
| prl_MOJUNIFAM  | -1.08 | 9  | 44.44 |

---

---

|               |       |    |       |
|---------------|-------|----|-------|
| prl_HEDYLOSAK | −0.24 | 13 | 38.46 |
| prl_WAGIPEBEK | −1.24 | 12 | 41.67 |
| prl_HEHIFOMOD | −1.24 | 14 | 42.86 |
| prl_HUTAKAKYW | −0.24 | 11 | 36.36 |
| prl_BYDEBYWAP | −0.2  | 10 | 80.00 |
| prl_FEDOVADUL | −0.24 | 14 | 21.43 |
| prl_FAVEDOGYF | 0.76  | 9  | 22.22 |
| prl_WYJYZUGEB | −1.12 | 8  | 50.00 |
| prl_DAWUBUFUV | −0.15 | 8  | 37.50 |
| prl_SAKYZUFOW | 0.8   | 7  | 42.86 |
| prl_BIVANYMYG | −2.24 | 19 | 31.58 |
| prl_TINUKETAF | −0.24 | 12 | 41.67 |
| prl_PUHYBOJOJ | −0.24 | 8  | 37.50 |
| prl_LYVATYPAB | −1.24 | 12 | 33.33 |
| prl_SYBYKYZEG | −1.23 | 21 | 33.33 |
| prl_TEBYHYJAW | 0.76  | 11 | 45.45 |
| prl_MEBABONUN | 0.76  | 7  | 14.29 |
| prl_NITUTOKUT | −0.15 | 20 | 30.00 |
| prl_WUDOPIPOB | −1.24 | 11 | 45.45 |
| prl_WUWOVEPUM | −0.15 | 16 | 62.50 |
| prl_MEJAZALAD | −0.2  | 8  | 50.00 |
| prl_DOLIFYGIG | −1.24 | 26 | 30.77 |
| prl_BUPYSUTOM | −0.54 | 12 | 58.33 |
| prl_DYLIZIJOL | −1.23 | 8  | 25.00 |
| prl_VOGAHOSEB | −2.24 | 10 | 50.00 |
| prl_FOFANISAW | 0.76  | 15 | 60.00 |
| prl_NUMIZOWOK | −0.24 | 14 | 50.00 |
| prl_WAMOVAZIM | −1.61 | 11 | 27.27 |
| prl_GYNOHUZUZ | 0.73  | 12 | 50.00 |
| prl_VYMIGYTUN | −0.24 | 7  | 42.86 |
| prl_MOMUFYFIH | −0.45 | 10 | 40.00 |
| prl_MYGATYFAH | −0.15 | 18 | 22.22 |
| prl_NIGOMEJUJ | −0.04 | 7  | 42.86 |
| prl_ZYPIKOVUF | −0.24 | 7  | 71.43 |
| prl_FYNUFYBYB | 0.76  | 7  | 28.57 |
| prl_VUGATUZIT | 0.05  | 9  | 11.11 |
| prl_DUPUTYKIF | −0.26 | 18 | 44.44 |
| prl_JATULUPIT | 0.85  | 8  | 12.50 |
| prl_BOJABYBUV | −2.15 | 11 | 54.55 |
| prl_GAJYWIGYG | −1.26 | 19 | 36.84 |
| prl_MIDAGEZIK | −0.15 | 10 | 50.00 |
| prl_ZYJKEBIP  | 0.76  | 8  | 50.00 |
| prl_HOMATEVAZ | −0.6  | 8  | 50.00 |
| prl_LUFOKETOS | 0.73  | 8  | 37.50 |
| prl_LAFESOSUV | −2.11 | 10 | 40.00 |
| prl_ZOWAJYSUD | −1.24 | 10 | 20.00 |
| prl_JIWYSIMUJ | 1.73  | 15 | 40.00 |
| prl_ZUWYDATAJ | −0.24 | 8  | 50.00 |
| prl_HEMANANAW | 0.04  | 11 | 45.45 |
| prl_ZUWOHOZEM | −3.23 | 16 | 50.00 |
| prl_DEWOVASYM | −2.23 | 11 | 45.45 |

---

---

|               |       |    |       |
|---------------|-------|----|-------|
| prl_WYNYPUFIB | −0.04 | 9  | 55.56 |
| prl_FEGOFAZEH | −0.24 | 21 | 19.05 |
| prl_DITUTIFOV | −0.24 | 9  | 55.56 |
| prl_LOMYNYPOK | −0.6  | 10 | 40.00 |
| prl_WEGAWUPYL | 0.73  | 7  | 57.14 |
| prl_PEHIIWIB  | −0.24 | 12 | 50.00 |
| prl_LITAZAZAD | −1.24 | 7  | 14.29 |
| prl_DISOGOFOH | −1.54 | 8  | 0.00  |
| prl_BASYZOKAN | −1.53 | 9  | 22.22 |
| prl_NAMAMIZEZ | −1.6  | 8  | 50.00 |
| prl_JAHOZUHAD | −2.04 | 14 | 21.43 |
| prl_FAJISEWUD | −0.15 | 11 | 54.55 |
| prl_SYKAGABIM | −0.15 | 7  | 42.86 |
| prl_ZAWYNONUK | 0.76  | 7  | 42.86 |
| prl_VEVENYZYZ | −2.24 | 15 | 40.00 |
| prl_ZIZAZEFAP | −1.23 | 14 | 42.86 |
| prl_BYGANUWEL | 0.04  | 9  | 22.22 |
| prl_JILALYTEP | −0.24 | 8  | 62.50 |
| prl_TEBIPOJUG | 0.82  | 9  | 55.56 |
| prl_DAZOWUBOW | 0.85  | 11 | 36.36 |
| prl_PETESOSEG | −0.6  | 7  | 71.43 |
| prl_BUSOTUHEK | −1.24 | 12 | 41.67 |
| prl_MYKIVOWAD | −1.24 | 12 | 41.67 |
| prl_MEHYFYNYW | 1.76  | 11 | 36.36 |
| prl_PYHEGILYZ | −0.15 | 13 | 53.85 |
| prl_HIKODEGYH | −4.16 | 26 | 26.92 |
| prl_MUWUHUWUB | −1.24 | 7  | 71.43 |
| prl_VUSIPAKAH | −1.54 | 7  | 71.43 |
| prl_GUDEGUVIN | −0.15 | 15 | 26.67 |
| prl_DEDEHOFAH | 0.76  | 8  | 37.50 |
| prl_KOWUBEJEF | −0.15 | 22 | 36.36 |
| prl_PUTAKYMOJ | 0.76  | 9  | 55.56 |
| prl_BALAGILOF | 0.96  | 8  | 50.00 |
| prl_TABEFYNOB | −0.24 | 12 | 25.00 |
| prl_LUZANAWEP | 0.05  | 7  | 28.57 |
| prl_SYBUMUMOG | −0.24 | 16 | 18.75 |
| prl_VOKOKYPIG | −2.23 | 14 | 50.00 |
| prl_VOSYFANAS | −0.16 | 9  | 44.44 |
| prl_NESIVEWUS | −1.23 | 12 | 50.00 |
| prl_HOTOSOTYS | −1.6  | 9  | 44.44 |
| prl_SYGAHESAZ | −1.24 | 8  | 50.00 |
| prl_LEVUZELUS | −0.45 | 14 | 50.00 |
| prl_ZASOBEWYP | −0.07 | 10 | 40.00 |
| prl_LETISIGUS | −1.15 | 13 | 38.46 |
| prl_ZABYNYTYT | −1.23 | 11 | 18.18 |
| prl_VUPAMIPEP | −0.27 | 7  | 42.86 |
| prl_SUGIGAKAV | −1.23 | 8  | 25.00 |
| prl_BOKOHUGUP | −0.15 | 8  | 62.50 |
| prl_ZIJKYLAZ  | 0.76  | 13 | 38.46 |
| prl_BUWOBYJAH | −1.26 | 18 | 33.33 |
| prl_TEDUBUJYJ | 0.96  | 11 | 36.36 |

---

---

|                |       |    |       |
|----------------|-------|----|-------|
| prl_ZYZENOTIV  | -0.24 | 8  | 37.50 |
| prl_BIPEPEWUZ  | -2.23 | 8  | 50.00 |
| prl_WEDUDEFEW  | -3.23 | 9  | 44.44 |
| prl_MOGIPINOH  | -0.23 | 7  | 42.86 |
| prl_GEHUBAWIB  | -1.24 | 13 | 23.08 |
| prl_DILAJOGIT  | -0.24 | 12 | 25.00 |
| prl_MIGABOHYH  | 0.76  | 9  | 22.22 |
| prl_KUMOFIVUP  | -2.23 | 13 | 23.08 |
| prl_BOKASEBIW  | -2.53 | 8  | 25.00 |
| prl_VISUKOBEB  | 1.79  | 10 | 30.00 |
| prl_NIKOSAKEW  | -1.15 | 9  | 44.44 |
| prl_LALEZENUB  | -0.16 | 7  | 28.57 |
| prl_BOLYDUPAL  | -0.15 | 15 | 33.33 |
| prl_MABYPUKOG  | -2.14 | 19 | 15.79 |
| prl_LAFIDYMOV  | -0.15 | 9  | 33.33 |
| prl_SUKUMYPUJ  | -1.2  | 14 | 28.57 |
| prl_ZENOHIEL   | -0.6  | 8  | 50.00 |
| prl_JYPEJEKAK  | 0.76  | 10 | 30.00 |
| prl_SUTEDOGIS  | -0.24 | 7  | 57.14 |
| prl_ZUMUDYNUK  | -1.24 | 9  | 44.44 |
| prl_JEFIWOBAG  | 0.75  | 25 | 48.00 |
| prl_TYGAHONAS  | -0.15 | 13 | 53.85 |
| prl_KOHYMUHOV  | -0.24 | 10 | 30.00 |
| prl_HINIBAMEL  | 0.75  | 10 | 60.00 |
| prl_DYJUVETYT  | -0.24 | 8  | 50.00 |
| prl_BEWETYDAP  | -0.54 | 12 | 50.00 |
| prl_NIHITUVIK  | -2.07 | 11 | 54.55 |
| prl_KEHIHODAW  | 0.76  | 12 | 50.00 |
| prl_FYJYZOHEW  | 0.79  | 13 | 30.77 |
| prl_VYTYGOKUS  | -0.54 | 9  | 44.44 |
| prl_HUGIGISEB  | -1.2  | 16 | 50.00 |
| prl_PYSANALIG  | -0.24 | 7  | 42.86 |
| prl_MYWABITOP  | 0.88  | 13 | 46.15 |
| prl_KEVASOWOK  | 0.4   | 8  | 25.00 |
| prl_PULANUVET  | -1.23 | 14 | 35.71 |
| prl_LANAHUWAS  | -1.15 | 10 | 40.00 |
| prl_PIMENAPOP  | 0.74  | 15 | 46.67 |
| prl_BUDABEDAZ  | -0.24 | 15 | 53.33 |
| prl_LATEWOZUJ  | -2.14 | 12 | 50.00 |
| prl_TOMUZONUG  | -2.24 | 11 | 18.18 |
| prl_MUFOSYLAH  | -0.04 | 10 | 40.00 |
| prl_NALIWEPTYT | -0.24 | 18 | 27.78 |
| prl_HAMUSELOP  | -0.12 | 26 | 34.62 |
| prl_BAVUKUSUL  | -0.15 | 9  | 55.56 |
| prl_MOMUTAMEF  | 0.76  | 12 | 33.33 |
| prl_LIDUJAZIN  | 0.76  | 10 | 30.00 |
| prl_BIVIKANYIS | 0.46  | 11 | 9.09  |
| prl_SUVOLANAT  | 0.76  | 11 | 54.55 |
| prl_ZAZIBYKEH  | -0.51 | 10 | 40.00 |
| prl_PUWIKUGAJ  | 0.85  | 13 | 38.46 |
| prl_PIMEZUFAS  | -2.17 | 13 | 61.54 |

---

---

|                |       |    |       |
|----------------|-------|----|-------|
| prl_JALAKIDAB  | -3.23 | 19 | 68.42 |
| prl_TENIBIVAM  | -0.24 | 7  | 28.57 |
| prl_KUKYJIHEZ  | -2.24 | 11 | 27.27 |
| prl_NAFYNAHYT  | -0.24 | 14 | 42.86 |
| prl_POTAHEVUT  | -1.45 | 12 | 16.67 |
| prl_FIKOVYDOT  | -1.99 | 8  | 12.50 |
| prl_GENIPANYP  | -1.24 | 11 | 18.18 |
| prl_TUKEMIZYL  | -1.24 | 12 | 41.67 |
| prl_MYBAPIZAD  | -1.97 | 10 | 20.00 |
| prl_SUSYBODOK  | -0.15 | 8  | 50.00 |
| prl_KUBYVYTOM  | 0.76  | 9  | 44.44 |
| prl_NOWYPEMIB  | -0.24 | 7  | 28.57 |
| prl_HEHEVUBAB  | -0.24 | 10 | 50.00 |
| prl_LOJIDATIK  | -2.16 | 7  | 57.14 |
| prl_FUBULYTAK  | -0.17 | 13 | 38.46 |
| prl_LANEVUJIN  | 0.73  | 11 | 54.55 |
| prl_BYDOGY SOP | 0.76  | 10 | 30.00 |
| prl_NYLYSEVAZ  | -0.24 | 13 | 15.38 |
| prl_GOKIDEWUZ  | -1.24 | 7  | 42.86 |
| prl_SYDAFIZUM  | -0.24 | 11 | 45.45 |
| prl_JIPYDOSAK  | -2.26 | 10 | 30.00 |
| prl_GIPISABAV  | 0.46  | 10 | 10.00 |
| prl_GOBUKAMIH  | -1.16 | 7  | 57.14 |
| prl_HUSEGEPUG  | 0.73  | 8  | 50.00 |
| prl_POSOVESYS  | 1.76  | 8  | 37.50 |
| prl_JAJILIVIP  | -1.24 | 13 | 38.46 |
| prl_HUHYDIKON  | 0.96  | 10 | 10.00 |
| prl_MOHAVYDIF  | 0.76  | 7  | 28.57 |
| prl_TIBUDITYS  | 0.76  | 10 | 50.00 |
| prl_DIGANIVOH  | -0.54 | 8  | 37.50 |
| prl_PEDOWYBYH  | -0.21 | 8  | 37.50 |
| prl_HUJOGIJIM  | -0.24 | 7  | 42.86 |
| prl_PABUFYLEL  | -0.24 | 17 | 29.41 |
| prl_WOGIHUKYV  | -0.24 | 14 | 21.43 |
| prl_LOMEVUJEG  | -3.11 | 15 | 40.00 |
| prl_GIMYLEGUS  | 0.76  | 13 | 38.46 |
| prl_LODATONIN  | 0.76  | 11 | 54.55 |
| prl_GOBIGAH OZ | -0.15 | 17 | 41.18 |
| prl_LILILIPAN  | -0.24 | 14 | 21.43 |
| prl_LUWIMYSUD  | -0.24 | 7  | 14.29 |
| prl_NUBYSUGOT  | -1.24 | 8  | 37.50 |
| prl_NOFOHIKIN  | -0.15 | 10 | 30.00 |
| prl_LEKAWOMUV  | -1.24 | 10 | 70.00 |
| prl_LALONOPYM  | -0.27 | 8  | 50.00 |
| prl_HAWEZUPOL  | -0.24 | 11 | 36.36 |
| prl_HILEGUDOG  | -2.14 | 14 | 42.86 |
| prl_HOWUPAFUD  | 0.96  | 9  | 44.44 |
| prl_FIZAZIVEL  | 0.76  | 15 | 40.00 |
| prl_BIZAMYDAT  | -2.54 | 16 | 37.50 |
| prl_KIBIMAJOP  | -0.27 | 8  | 50.00 |
| prl_BONYWELYB  | -1.23 | 19 | 57.89 |

---



---

|               |       |    |       |
|---------------|-------|----|-------|
| prl_PAGYBUGOT | -0.24 | 8  | 25.00 |
| prl_TYSENEZYK | -0.24 | 12 | 58.33 |
| prl_WYDOTOKID | -1.24 | 9  | 55.56 |
| prl_BEWIKOSIG | -1.2  | 13 | 15.38 |
| prl_GEBEGUHUG | -1.24 | 12 | 33.33 |
| prl_KIMEGOSAW | -2.24 | 8  | 37.50 |
| prl_KAHAJIGAW | 0.76  | 7  | 57.14 |
| prl_PESUZIHAN | 0.76  | 8  | 62.50 |
| prl_KUNELYKAF | -1.24 | 7  | 57.14 |
| prl_KOLYDADIG | -2.08 | 8  | 25.00 |
| prl_MAWINYFYH | -0.24 | 16 | 25.00 |
| prl_TOSYGIDIH | -0.24 | 12 | 41.67 |
| prl_ZOFATOTIJ | -2.07 | 12 | 50.00 |
| prl_TENEZOPUN | -1.24 | 7  | 42.86 |
| prl_LUDYMYNIM | -0.53 | 11 | 54.55 |
| prl_ZYJILOSUM | 1.76  | 9  | 55.56 |
| prl_FIBOBAPIP | -1.15 | 17 | 35.29 |
| prl_DIVIMOVOF | -2.24 | 15 | 53.33 |
| prl_HYZYJAKEV | 0.5   | 10 | 40.00 |
| prl_PYPIGIVOG | -2.24 | 10 | 60.00 |
| prl_PIDEVEJYN | -1.96 | 18 | 61.11 |
| prl_HEBEGIZOV | -1.24 | 9  | 55.56 |
| prl_PUSUWYJIM | -1.15 | 9  | 66.67 |
| prl_KOZIDUDOZ | -0.24 | 8  | 87.50 |
| prl_GYVYBYDED | -0.24 | 8  | 37.50 |
| prl_DENANYMUT | -0.27 | 7  | 71.43 |
| prl_BIMOLUWEP | -0.24 | 15 | 13.33 |
| prl_MUGABYLUL | 0.76  | 8  | 37.50 |
| prl_FADONUFEB | -1.15 | 10 | 20.00 |
| prl_SINIGUWIJ | -0.25 | 13 | 38.46 |
| prl_DAVENEDAF | -2.54 | 14 | 28.57 |
| prl_WYZELEBUL | -0.26 | 7  | 28.57 |
| prl_DOSODYDYW | -0.6  | 7  | 28.57 |
| prl_NIJODYHUF | -1.24 | 8  | 62.50 |
| prl_GEZUGOWOD | -2.17 | 12 | 66.67 |
| prl_JAVIDYMOZ | -0.24 | 7  | 85.71 |
| prl_NONUBYKYG | -3.15 | 8  | 62.50 |
| prl_KUPEVAHEL | -0.6  | 8  | 0.00  |
| prl_KOLEFAWON | 0.79  | 8  | 37.50 |
| prl_PISIPYHIZ | -0.24 | 8  | 50.00 |
| prl_ZITALAHOP | -0.15 | 16 | 50.00 |
| prl_TYVOPYJYH | -0.95 | 7  | 28.57 |
| prl_VEFEZISAS | -0.24 | 13 | 38.46 |
| prl_ZUPOKOTOH | -1.23 | 12 | 25.00 |
| prl_KAGUHUTOM | -1.23 | 10 | 40.00 |
| prl_PUZOPYWIP | -3.53 | 10 | 20.00 |
| prl_DEJYFYMAM | 0.4   | 13 | 38.46 |
| prl_HAGOLYKIS | -1.24 | 9  | 77.78 |
| prl_KEGIWOFUB | 2.76  | 12 | 33.33 |
| prl_TONOLYDAB | -0.24 | 8  | 50.00 |
| prl_NAGUNAPIW | -0.45 | 8  | 50.00 |

---

---

|               |       |    |       |
|---------------|-------|----|-------|
| prl_LYWALYKYG | -2.16 | 8  | 37.50 |
| prl_GYNAKUSYG | 0.76  | 13 | 38.46 |
| prl_JUTYTODET | -0.08 | 11 | 36.36 |
| prl_DITITESUB | -3.16 | 11 | 36.36 |
| prl_SUFUVABAZ | -0.15 | 7  | 71.43 |
| prl_GYBIHEHUW | -2.26 | 12 | 58.33 |
| prl_SIBEJUFEJ | -0.24 | 10 | 40.00 |
| prl_PINUWEBUZ | -1.24 | 10 | 20.00 |
| prl_VIHEHESYZ | 0.8   | 12 | 66.67 |
| prl_GIMIJDEN  | -1.51 | 13 | 23.08 |
| prl_FUHUBEPYH | -2.16 | 9  | 66.67 |
| prl_BEFYJULIP | 0.76  | 11 | 54.55 |
| prl_DYSAFAWOG | -1.24 | 9  | 55.56 |
| prl_TOHEDIMAK | -0.26 | 17 | 41.18 |
| prl_ZUHUNOBUJ | 1.76  | 13 | 53.85 |
| prl_VATAWIPUW | -0.24 | 11 | 36.36 |
| prl_PEFUWEVES | -0.27 | 10 | 80.00 |
| prl_MIHONYMEP | -2.24 | 12 | 58.33 |
| prl_GAFYBOFUK | -1.2  | 9  | 22.22 |
| prl_LEDUTAGOV | -0.24 | 8  | 37.50 |
| prl_SASYTUZUW | 0.4   | 11 | 54.55 |
| prl_TUPYVITUH | 0.8   | 10 | 50.00 |
| prl_WIVEGAJOZ | -2.23 | 14 | 14.29 |
| prl_LOLOVAHUN | 0.76  | 14 | 42.86 |
| prl_ZOGOZYMUK | -1.24 | 10 | 30.00 |
| prl_MIKASAJUD | 0.76  | 11 | 63.64 |
| prl_MEBAFAVOW | 0.79  | 10 | 30.00 |
| prl_LAJOVEPUV | -0.54 | 12 | 58.33 |
| prl_POKOBYSOH | 0.76  | 9  | 66.67 |
| prl_DYBEKELYP | -3.15 | 16 | 12.50 |
| prl_WUVEGAKUT | 0.8   | 12 | 33.33 |
| prl_PYFAHOVIF | -0.15 | 13 | 53.85 |
| prl_WEJUMYMIV | -0.15 | 10 | 80.00 |
| prl_DIJAHABIB | -2.15 | 19 | 57.89 |
| prl_SYDYZYWEJ | -0.24 | 7  | 28.57 |
| prl_SUHONUTIL | -0.24 | 20 | 20.00 |
| prl_VEWYGOJIL | -0.18 | 15 | 60.00 |
| prl_LYNUKEPEZ | -1.06 | 10 | 10.00 |
| prl_VUDENESUP | -0.54 | 8  | 25.00 |
| prl_MIPYDYSON | -3.23 | 9  | 33.33 |
| prl_GYFASUJAW | -0.2  | 7  | 57.14 |
| prl_WOTUNYKEM | -1.24 | 11 | 9.09  |
| prl_TEWOWOMUB | -0.04 | 9  | 44.44 |
| prl_FEDIBEJYS | -0.24 | 7  | 42.86 |
| prl_LINOMOHOT | -1.24 | 14 | 21.43 |
| prl_VUSEWAFOH | -0.24 | 11 | 63.64 |
| prl_BOJOZAPIN | 0.76  | 12 | 33.33 |
| prl_VYSUDAZYB | -0.24 | 8  | 37.50 |
| prl_SYNAHYZOB | -1.15 | 9  | 55.56 |
| prl_FALUJYPYZ | -0.23 | 9  | 44.44 |
| prl_MAVEMEMAF | -3.23 | 12 | 25.00 |

---

---

|               |       |    |       |
|---------------|-------|----|-------|
| prl_SENUBUWIZ | -2.26 | 14 | 35.71 |
| prl_WEHELASEB | -2.59 | 9  | 22.22 |
| prl_SEMOWIHOH | 0.76  | 15 | 46.67 |
| prl_KUDILOBEN | 0.93  | 11 | 54.55 |
| prl_GAZUFISYN | -0.26 | 7  | 57.14 |
| prl_WUHOTYZIF | -2.23 | 13 | 38.46 |
| prl_MYSUFIFED | -1.24 | 9  | 66.67 |
| prl_SEFUKEHOZ | -1.18 | 14 | 50.00 |
| prl_TIWEWADUD | -0.15 | 10 | 50.00 |
| prl_JIPAZUHOB | -0.24 | 9  | 55.56 |
| prl_NYTYZYBAD | 0.76  | 7  | 42.86 |
| prl_BUSUMONUJ | -2.14 | 15 | 46.67 |
| prl_LITAPUPET | -3.23 | 14 | 42.86 |
| prl_TYFASOSOD | -1.24 | 9  | 33.33 |
| prl_DAHYFETIS | -2.15 | 12 | 41.67 |
| prl_GOHANOPYV | 1.05  | 10 | 10.00 |
| prl_JESOWEHOT | -1.26 | 7  | 42.86 |
| prl_DIJUZEPE  | -1.17 | 9  | 44.44 |
| prl_NYDYGISAW | -1.16 | 10 | 50.00 |
| prl_DILYTUWOS | -1.04 | 10 | 40.00 |
| prl_LYHATIMOM | -0.24 | 9  | 22.22 |
| prl_LETEGUGYP | -0.24 | 9  | 33.33 |
| prl_BUNOFIWT  | -1.15 | 11 | 27.27 |
| prl_KAZANIFOZ | 0.76  | 7  | 57.14 |
| prl_BYVYBIDIH | 0.82  | 8  | 25.00 |
| prl_SUVUMIDYP | -1.23 | 10 | 50.00 |
| prl_LIFYNOZIM | -2.26 | 9  | 44.44 |
| prl_BYHAMUDIS | -1.23 | 13 | 46.15 |
| prl_JUZOTISUH | -1.45 | 15 | 40.00 |
| prl_HYBANAZEB | 0.76  | 7  | 85.71 |
| prl_TYSITUGYJ | -0.15 | 14 | 64.29 |
| prl_LIKOTALAG | -0.24 | 8  | 25.00 |
| prl_ZOVIBASYJ | -2.26 | 9  | 44.44 |
| prl_FYTUNAGEJ | -0.24 | 15 | 26.67 |
| prl_BEHUDESIJ | -1.24 | 8  | 37.50 |
| prl_SEPYZUTIS | 0.76  | 11 | 36.36 |
| prl_VUSUFYPAT | -0.15 | 13 | 53.85 |
| prl_FYGOWEKYV | -0.24 | 9  | 11.11 |
| prl_VIVIFULOK | -3.23 | 16 | 37.50 |
| prl_TOWIKETEG | -2.53 | 9  | 44.44 |
| prl_DIFILETIS | -2.24 | 11 | 54.55 |
| prl_TIWUNETYM | -2.45 | 11 | 36.36 |
| prl_JABUWOBE  | -1.94 | 22 | 9.09  |
| prl_LUPUMEJIL | 0.76  | 9  | 33.33 |
| prl_MEJUVEMIZ | -0.15 | 11 | 27.27 |
| prl_SALOPINON | -1.24 | 16 | 37.50 |
| prl_HILYMUF   | -0.04 | 10 | 30.00 |
| prl_DUBOSIHEJ | -3.16 | 15 | 33.33 |
| prl_TILINEMYF | -1.16 | 13 | 30.77 |
| prl_KYLINEBIV | -0.27 | 7  | 57.14 |
| prl_VALOTUTES | -0.15 | 9  | 44.44 |

---

---

|                |       |    |       |
|----------------|-------|----|-------|
| prl_PITUMUVON  | −0.2  | 10 | 40.00 |
| prl_MYVOSIVAS  | −1.26 | 15 | 46.67 |
| prl_KUBEVUGUW  | −0.15 | 10 | 40.00 |
| prl_MEMUSOFIT  | −0.24 | 9  | 66.67 |
| prl_FATUMOHYW  | −0.04 | 8  | 25.00 |
| prl_VIGIHETEN  | −2.04 | 12 | 58.33 |
| prl_NUJUDYTUJ  | 0.76  | 11 | 63.64 |
| prl_HYTYHOFOH  | −1.23 | 15 | 20.00 |
| prl_KAZEKYGIT  | −0.54 | 15 | 46.67 |
| prl_MEFAGUVYG  | −1.15 | 11 | 63.64 |
| prl_NIKIFYPYM  | −1.24 | 10 | 50.00 |
| prl_NINAGULOL  | −1.24 | 8  | 50.00 |
| prl_KENINAHHEL | 0.76  | 11 | 36.36 |
| prl_SEHUZOZYF  | −0.24 | 8  | 37.50 |
| prl_VASYVALUV  | −1.16 | 7  | 57.14 |
| prl_KALEZUPOB  | −1.24 | 7  | 42.86 |
| prl_SEJODEBIN  | −0.6  | 9  | 44.44 |
| prl_PUPATIPOP  | −0.23 | 12 | 50.00 |
| prl_GETULADEJ  | −1.24 | 19 | 31.58 |
| prl_WETALYBYW  | −1.24 | 7  | 57.14 |
| prl_LOTOPOTUJ  | −0.15 | 12 | 25.00 |
| prl_WANIBOBOB  | 1.76  | 15 | 40.00 |
| prl_MULIPYZYZ  | −0.24 | 7  | 14.29 |
| prl_FIHEBUDYZ  | 0.79  | 9  | 22.22 |
| prl_TAVATYNYD  | −0.24 | 10 | 20.00 |
| prl_DYLYNOMAB  | −3.23 | 8  | 50.00 |
| prl_HEDOTEBYW  | −2.07 | 15 | 26.67 |
| prl_HIGIWWYVID | 1.8   | 19 | 36.84 |
| prl_HALUTAGAL  | −0.24 | 10 | 40.00 |
| prl_VIHOTOTAN  | −1.2  | 11 | 27.27 |
| prl_VEBYWOFAD  | −0.24 | 9  | 55.56 |
| prl_JELYMOFEG  | −1.15 | 12 | 58.33 |
| prl_KYNILIFAP  | −0.12 | 7  | 57.14 |
| prl_WUSOPANIK  | −1.24 | 13 | 46.15 |
| prl_FESUBYBYP  | −0.24 | 18 | 33.33 |
| prl_BESOKIVIK  | −0.27 | 7  | 42.86 |
| prl_FUFADEHIK  | −2.04 | 14 | 28.57 |
| prl_ZIVEDUNYN  | −0.24 | 11 | 18.18 |
| prl_LIFYPEZOT  | −1.24 | 14 | 28.57 |
| prl_LADABYDIN  | 0.85  | 11 | 18.18 |
| prl_LOBETILIP  | −3.44 | 21 | 38.10 |
| prl_MEHUFABAD  | −0.15 | 10 | 50.00 |
| prl_LAGUSIJIG  | −0.24 | 16 | 31.25 |
| prl_GUTYWYWEG  | 0.85  | 15 | 53.33 |
| prl_WUVIHEKYK  | −1.24 | 14 | 50.00 |
| prl_TIZIBAZEB  | −2.45 | 19 | 42.11 |
| prl_GOBYPAHAG  | −0.24 | 16 | 25.00 |
| prl_FOSAWUWEG  | −2.23 | 9  | 22.22 |
| prl_WIFYLOTUM  | −1.2  | 7  | 57.14 |
| prl_GUFAKEMOM  | −1.26 | 13 | 38.46 |
| prl_LOZEPOKAF  | −0.15 | 14 | 28.57 |

---

---

|                |       |    |       |
|----------------|-------|----|-------|
| prl_PAGOLEGYL  | −0.2  | 12 | 58.33 |
| prl_DAMYLYHUK  | −1.24 | 9  | 66.67 |
| prl_JAHAMASUM  | −0.2  | 8  | 62.50 |
| prl_TEVILIVAL  | −0.15 | 17 | 64.71 |
| prl_LANUJANYB  | 1.82  | 18 | 55.56 |
| prl_WEJIMIMYK  | −0.2  | 7  | 42.86 |
| prl_WAZAPABYT  | −0.15 | 7  | 42.86 |
| prl_LOFUJYZIW  | 0.76  | 13 | 46.15 |
| prl_HEWUJIK    | −2.16 | 8  | 62.50 |
| prl_FAZONONIS  | 0.85  | 16 | 25.00 |
| prl_VAKONNOZUZ | −0.24 | 13 | 38.46 |
| prl_TAPYHOLAT  | −0.24 | 12 | 25.00 |
| prl_DUSAMUZYS  | −2.14 | 11 | 45.45 |
| prl_TUMANEP    | 0.76  | 15 | 46.67 |
| prl_NAGYBEWED  | −2.23 | 11 | 36.36 |
| prl_KEBAFOBIG  | −1.24 | 11 | 36.36 |
| prl_POWAGAZEZ  | −0.24 | 12 | 41.67 |
| prl_GYFYZUHUL  | −1.23 | 8  | 50.00 |
| prl_WANAJIBUL  | −0.22 | 23 | 52.17 |
| prl_KAKISANIJ  | −3.17 | 14 | 21.43 |
| prl_PUSAFOJAL  | −1.23 | 7  | 28.57 |
| prl_VEDADESYL  | −0.41 | 7  | 42.86 |
| prl_SUWILUPIF  | 0.76  | 13 | 38.46 |
| prl_POZASAMOF  | −1.6  | 8  | 75.00 |
| prl_VONOVYHET  | −1.14 | 23 | 21.74 |
| prl_VOWIZUSEM  | −0.07 | 7  | 42.86 |
| prl_NOSEZIZAN  | −0.24 | 11 | 9.09  |
| prl_HEBAKABEV  | −2.45 | 9  | 44.44 |
| prl_NUJYVUHOW  | −2.6  | 23 | 13.04 |
| prl_GYTEGIVAK  | −1.24 | 13 | 53.85 |
| prl_LULIDATIT  | −0.24 | 7  | 42.86 |
| prl_DAJYBIBOW  | −1.15 | 10 | 50.00 |
| prl_GOBUMYJEM  | −1.24 | 8  | 62.50 |
| prl_VEPOKOVIL  | −0.24 | 8  | 37.50 |
| prl_LYPOLEZEW  | 0.76  | 11 | 36.36 |
| prl_VAKUVEFEN  | 0.76  | 8  | 12.50 |
| prl_NILUZESAZ  | 1.74  | 20 | 50.00 |
| prl_BAHAGIPED  | −0.24 | 8  | 50.00 |
| prl_WIGOVAFYZ  | 0.79  | 8  | 37.50 |
| prl_POSUHULIZ  | −0.15 | 8  | 50.00 |
| prl_MUJEKYNOJ  | −0.15 | 8  | 37.50 |
| prl_PIFAJIPAL  | −0.24 | 13 | 53.85 |
| prl_JEVUDUWUB  | −1.24 | 12 | 66.67 |
| prl_MEVAZYTYP  | 0.96  | 9  | 11.11 |
| prl_VULYTAGAZ  | 0.76  | 10 | 50.00 |
| prl_HEFUMIHIB  | −0.24 | 14 | 71.43 |
| prl_SUHOTUGIK  | 0.76  | 13 | 53.85 |
| prl_WEPYNOSUW  | 0.76  | 18 | 16.67 |
| prl_LOTIPIPIV  | −0.24 | 7  | 28.57 |
| prl_JYSONEZAW  | −2.16 | 9  | 44.44 |
| prl_FAMONUPIN  | −3.14 | 22 | 18.18 |

---

---

|                |       |    |       |
|----------------|-------|----|-------|
| prl_KOVELYJYP  | −0.15 | 7  | 42.86 |
| prl_MAVOSITUV  | −0.15 | 7  | 42.86 |
| prl_DYPUKAGYS  | −1.16 | 15 | 53.33 |
| prl_DOHODOZYS  | −0.54 | 11 | 72.73 |
| prl_PULOFOUWV  | −0.15 | 7  | 42.86 |
| prl_MAHONYTYF  | −2.26 | 8  | 50.00 |
| prl_SYTYSESAJ  | −0.24 | 8  | 12.50 |
| prl_WAFAWETAP  | −0.51 | 9  | 33.33 |
| prl_PYKEHUJAF  | 0.76  | 9  | 11.11 |
| prl_DIPAPIGIB  | −1.14 | 22 | 22.73 |
| prl_JOGOGIGIM  | −1.24 | 13 | 23.08 |
| prl_BIDUVIFEB  | −0.41 | 7  | 57.14 |
| prl_JOBFAHEF   | −0.24 | 7  | 57.14 |
| prl_PIKUPEGIJ  | −1.24 | 10 | 50.00 |
| prl_HOLAVUGOF  | −1.26 | 10 | 40.00 |
| prl_VATOGESYM  | −0.24 | 8  | 62.50 |
| prl_ZIFISAJAZ  | 0.41  | 14 | 14.29 |
| prl_NILEDUNIS  | 0.73  | 9  | 55.56 |
| prl_HYHYPOWYT  | −0.27 | 8  | 50.00 |
| prl_PYVELATIJ  | −3.03 | 10 | 60.00 |
| prl_PUKIZAPON  | 0.73  | 16 | 43.75 |
| prl_WAKIMOJEP  | −0.23 | 12 | 41.67 |
| prl_GYWAFOTYT  | −2.53 | 7  | 42.86 |
| prl_JEKAGALEN  | 0.76  | 15 | 40.00 |
| prl_BIMALASOV  | −1.23 | 11 | 45.45 |
| prl_PYTUHIPAK  | 0.55  | 9  | 11.11 |
| prl_SAHYPAFEV  | −1.15 | 10 | 40.00 |
| prl_FUMALIKUP  | −0.15 | 9  | 44.44 |
| prl_ZYSEBALIV  | −1.24 | 9  | 44.44 |
| prl_BYVONABUH  | 0.75  | 27 | 29.63 |
| prl_TUZEBAUD   | 0.8   | 18 | 44.44 |
| prl_DEZYNOZIN  | −0.24 | 9  | 44.44 |
| prl_BAVIMOSYW  | 0.79  | 9  | 22.22 |
| prl_FEJEFOVEW  | −2.24 | 15 | 53.33 |
| prl_FAFEDONAV  | −1.24 | 7  | 57.14 |
| prl_VAJYHABUJ  | −1.45 | 10 | 60.00 |
| prl_JIBYBUKOV  | −0.51 | 13 | 38.46 |
| prl_HYBADUJOF  | −1.45 | 12 | 33.33 |
| prl_PASIKUKOW  | −0.24 | 9  | 33.33 |
| prl_NUDUWOGAD  | 0.76  | 10 | 60.00 |
| prl_BYJYJYLET  | −1.07 | 9  | 33.33 |
| prl_MIWOWIZYD  | −2.17 | 9  | 44.44 |
| prl_ZEMABUGYT  | −3.25 | 20 | 40.00 |
| prl_KOWYJUZIM  | −1.24 | 9  | 44.44 |
| prl_KYHYDONUZ  | 0.76  | 11 | 36.36 |
| prl_JEKYPIVOM  | 0.85  | 7  | 42.86 |
| prl_PYNIGUWES  | −2.23 | 12 | 33.33 |
| prl_TINOSYSTEM | 0.85  | 15 | 40.00 |
| prl_FIWYTOLOL  | 0.4   | 9  | 44.44 |
| prl_TYWUFIMUL  | −1.16 | 8  | 62.50 |
| prl_DAPADIWIF  | 0.8   | 11 | 54.55 |

---

---

|               |       |    |       |
|---------------|-------|----|-------|
| prl_JUWEWUNOZ | 0.82  | 11 | 54.55 |
| prl_JYMUNAMAJ | -2.23 | 9  | 22.22 |
| prl_FOSULODEG | -0.15 | 8  | 37.50 |
| prl_TOZULIGAS | -3.23 | 13 | 30.77 |
| prl_GYFYSYKOW | -0.54 | 7  | 42.86 |
| prl_JIPIWIFYN | -0.6  | 8  | 50.00 |
| prl_FELAKINEJ | -1.15 | 11 | 72.73 |
| prl_KIFEBAPON | 0.76  | 17 | 29.41 |
| prl_GOHABAWEL | -0.15 | 11 | 36.36 |
| prl_SATITYKYW | -0.24 | 8  | 50.00 |
| prl_SAGADULIZ | -0.15 | 9  | 33.33 |
| prl_TYPILIVOK | 0.76  | 14 | 57.14 |
| prl_BIWUKOFUW | 0.76  | 10 | 50.00 |
| prl_JOTEGEDET | -1.23 | 16 | 25.00 |
| prl_HATEBAGYD | 0.76  | 9  | 55.56 |
| prl_DEJEZAPAP | -2.23 | 13 | 15.38 |
| prl_DESUGIVEK | -0.04 | 12 | 41.67 |
| prl_BETYNIGUM | 0.76  | 12 | 16.67 |
| prl_WUJASAHIW | -1.24 | 10 | 20.00 |
| prl_BEWIVIGOB | -1.07 | 10 | 20.00 |
| prl_HIVEHAVYV | 1.76  | 9  | 55.56 |
| prl_VEVAMUGYB | -1.26 | 8  | 37.50 |
| prl_FEHOVOSIZ | 0.76  | 7  | 14.29 |
| prl_GELEFEMAS | -3.53 | 12 | 25.00 |
| prl_NUWEWOWOJ | -3.19 | 12 | 33.33 |
| prl_VUZUBILIJ | 0.46  | 8  | 62.50 |
| prl_JEPUJYKOT | -2.08 | 9  | 22.22 |
| prl_VYGOLAJYB | -2.11 | 10 | 60.00 |
| prl_TIHYVILOD | -3.48 | 13 | 23.08 |
| prl_GYKIVAPOK | -2.23 | 15 | 53.33 |
| prl_SAPEBOVIW | -1.2  | 12 | 58.33 |
| prl_KIVYKINOW | 0.05  | 10 | 50.00 |
| prl_VISIWIPUM | -2.16 | 17 | 17.65 |
| prl_BIBOPUNOB | -0.6  | 11 | 54.55 |
| prl_WOPATULYG | -1.23 | 21 | 28.57 |
| prl_ZANIBYLIP | -2.15 | 17 | 52.94 |
| prl_DIPANUGAF | -1.12 | 9  | 44.44 |
| prl_FYMOLOFAK | -1.6  | 7  | 57.14 |
| prl_DAJADOZUW | -1.26 | 12 | 50.00 |
| prl_WOVYGEDUZ | -2.23 | 13 | 46.15 |
| prl_DYZATULEN | -1.2  | 14 | 57.14 |
| prl_JUDYKOSOM | -0.24 | 9  | 22.22 |
| prl_GOKYFYTYB | -0.26 | 12 | 50.00 |
| prl_NABYSANAK | -0.26 | 16 | 31.25 |
| prl_VIPAPIJOG | -0.15 | 12 | 50.00 |
| prl_FAMYTIFOJ | 0.46  | 13 | 46.15 |
| prl_DUPAVYPIK | 0.46  | 7  | 57.14 |
| prl_POTELUPIJ | 0.85  | 15 | 40.00 |
| prl_KIFUVYVAT | -3.19 | 12 | 33.33 |
| prl_HUKAZINUK | 0.76  | 11 | 54.55 |
| prl_FUSUWUDED | -1.14 | 14 | 14.29 |

---

---

|               |       |    |       |
|---------------|-------|----|-------|
| prl_PAKOBUMUV | 0.46  | 9  | 11.11 |
| prl_ZAZIVYHAL | −4.53 | 12 | 25.00 |
| prl_VUKATUJUL | 0.55  | 11 | 18.18 |
| prl_VAKEWEVYV | −0.15 | 13 | 53.85 |
| prl_KEJIWITOF | −0.18 | 7  | 42.86 |
| prl_VUJITOSOL | 1.76  | 16 | 43.75 |
| prl_JYFETONID | −0.24 | 14 | 42.86 |
| prl_LAJIHOHYD | −1.24 | 18 | 27.78 |
| prl_KISATEPAV | 0.79  | 7  | 28.57 |
| prl_FOJEDAMUP | 0.76  | 10 | 50.00 |
| prl_SEJUHIMUS | −1.24 | 7  | 57.14 |
| prl_FIBEGYNAV | −1.24 | 29 | 24.14 |
| prl_NUPABADED | −1.54 | 13 | 46.15 |
| prl_MESOKOJOZ | −0.24 | 8  | 50.00 |
| prl_MYNAPUTAH | −0.16 | 7  | 42.86 |
| prl_DANUNUZYT | −0.15 | 14 | 28.57 |
| prl_WESOPYPYM | 0.76  | 9  | 55.56 |
| prl_DILYVASAL | −1.2  | 8  | 25.00 |
| prl_JODEPYVID | 0.76  | 9  | 22.22 |
| prl_WAVIVYDEG | −3.19 | 13 | 53.85 |
| prl_TIFEJUDYF | −0.24 | 13 | 38.46 |
| prl_HOJETOBIT | −0.24 | 15 | 60.00 |
| prl_WUVYBYGAZ | 0.76  | 12 | 25.00 |
| prl_MOVUDEVIT | −1.26 | 15 | 33.33 |
| prl_LEWESIBEG | −2.16 | 14 | 21.43 |
| prl_WOZAGUWAJ | −1.24 | 12 | 41.67 |
| prl_GODAZEPYP | −1.2  | 12 | 58.33 |
| prl_SOFILYNAL | −0.24 | 10 | 50.00 |
| prl_DYNALAMIL | −0.15 | 16 | 43.75 |
| prl_KUPITIMIZ | −3.23 | 21 | 28.57 |
| prl_KYJYMYMOB | −2.07 | 10 | 60.00 |
| prl_MIDYNYWUH | −2.14 | 23 | 17.39 |
| prl_HAGYKOLYL | 0.76  | 10 | 40.00 |
| prl_POLATAPAS | −1.15 | 12 | 25.00 |
| prl_PESUTIJIV | 0.96  | 8  | 50.00 |
| prl_TAZUVAHAD | −3.16 | 7  | 14.29 |
| prl_LAKUZUJAD | −2.54 | 18 | 33.33 |
| prl_MOWIPUDIV | 0.76  | 14 | 42.86 |
| prl_MYBOGALYH | −0.24 | 7  | 71.43 |
| prl_MEDYPAGAH | −1.23 | 8  | 25.00 |
| prl BUMUPOVEB | −3.49 | 11 | 27.27 |
| prl_ZOJAKABAL | −0.16 | 11 | 36.36 |
| prl_PIVUJANUW | −3.53 | 9  | 44.44 |
| prl_JEKEHEZIB | −1.24 | 14 | 42.86 |
| prl_WEGIBIPIK | 0.76  | 8  | 50.00 |
| prl_FEMEFOSYL | 1.96  | 13 | 23.08 |
| prl_ZINASIPUT | −0.18 | 7  | 71.43 |
| prl_FAKEVOGEP | 1.46  | 10 | 30.00 |
| prl_KUVYFADEM | 1.73  | 9  | 44.44 |
| prl_FEFOMIZIN | −3.15 | 17 | 17.65 |
| prl_TEMATOWIB | −0.24 | 10 | 40.00 |

---



---

|               |       |    |       |
|---------------|-------|----|-------|
| prl_JABAPAVAW | −1.18 | 13 | 46.15 |
| prl_BAKUPEPYT | −1.12 | 8  | 50.00 |
| prl_MOMIGOZAF | −2.23 | 11 | 45.45 |

---
